# Supplementary material for: Solid-state silica gel-catalyzed synthesis of fluorescent polysubstituted 1,4- and 1,2-dihydropyridines
Source: Royal Society of Chemistry journal article supplement (doi:10.1039/d2ob02119f), 2023-01-01
Supplement: d2ob02119f1.pdf [file d2ob02119f1.pdf]

## Solid-State Silica Gel-Catalyzed Synthesis of Fluorescent Polysubstituted 1,4- and 1,2-Dihydropyridines

Jovana Aleksić,<sup>1\*</sup> Milovan Stojanović,<sup>1</sup> Jakša Bošković<sup>2</sup> and Marija Baranac-Stojanović<sup>2\*</sup>

<sup>1</sup> *University of Belgrade - Institute of Chemistry, Technology and Metallurgy - Center for Chemistry, Njegoševa 12, P.O.Box 473, 11000 Belgrade, Serbia*

<sup>2</sup> *University of Belgrade - Faculty of Chemistry, Studentski trg 12-16, P.O.Box 158, 11000 Belgrade, Serbia*

### Supporting Information

#### Table of Contents

|                                                                                                                                 |     |
|---------------------------------------------------------------------------------------------------------------------------------|-----|
| <b>Scheme S1.</b> Possible products that could be obtained by the reaction of two molecules<br>of diene <b>1</b> .....          | S2  |
| Copies of <sup>1</sup> H NMR and <sup>13</sup> C NMR spectra of synthesized compounds.....                                      | S3  |
| Absolute energies and x, y, z coordinates of optimized structures<br>at the M062X/6-311+G(d,p) level of theory at 373.15 K..... | S88 |

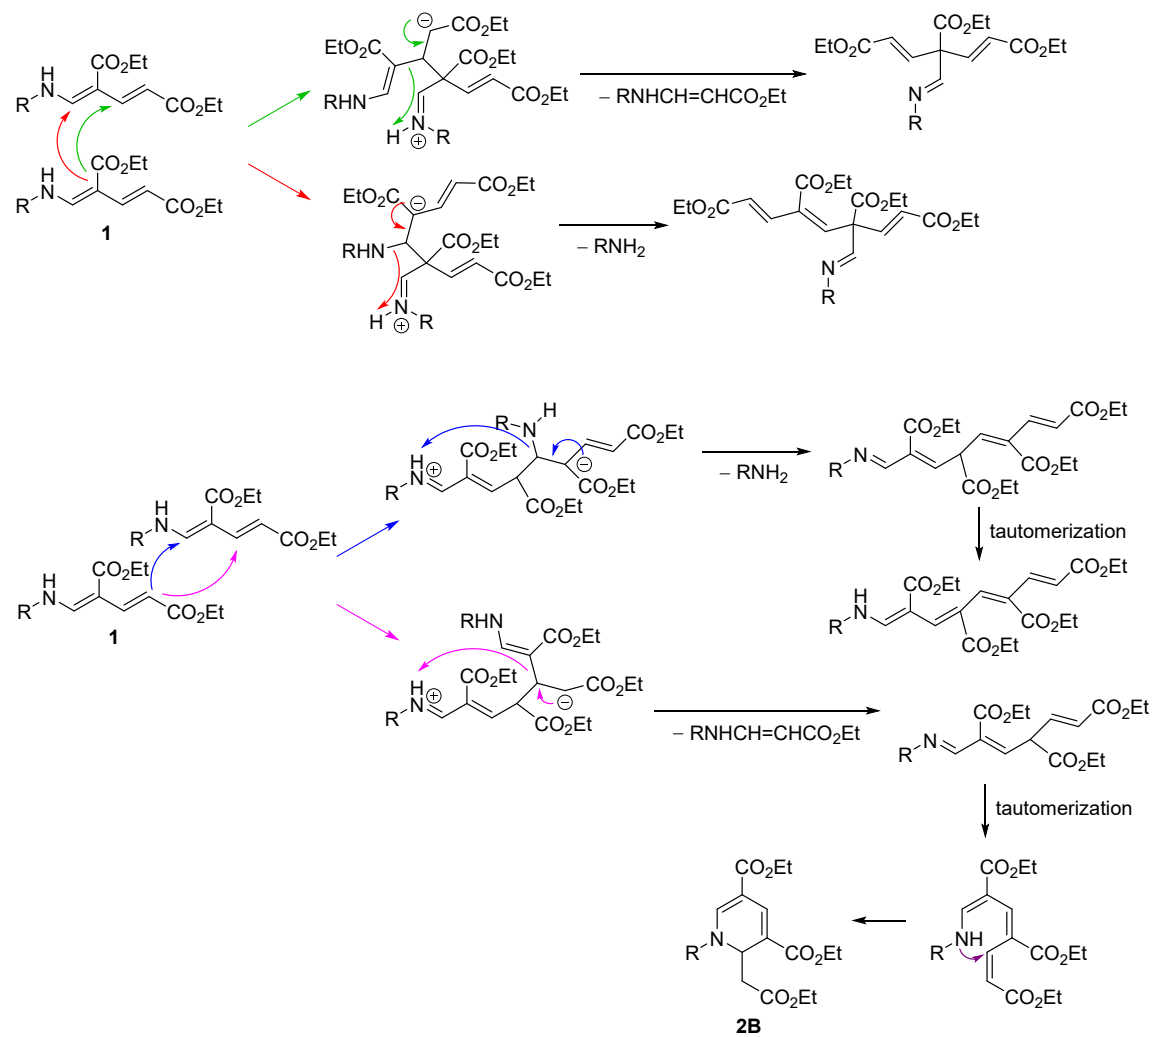

**Scheme S1.** Possible products that could be obtained by the reaction of two molecules of diene **1**.

## **Copies of $^1\text{H}$ NMR and $^{13}\text{C}$ NMR spectra of synthesized compounds**

The signal at 155 ppm, which is visible in several  $^{13}\text{C}$  NMR spectra, comes from electronic noise.

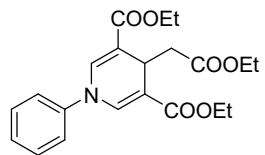

2aA

7.578  
7.442  
7.422  
7.403  
7.288  
7.269  
7.251  
7.236  
7.217

4.278  
4.266  
4.248  
4.230  
4.213  
4.062  
4.044  
4.026  
4.008

2.602  
2.590

1.325  
1.308  
1.290  
1.196  
1.178  
1.161

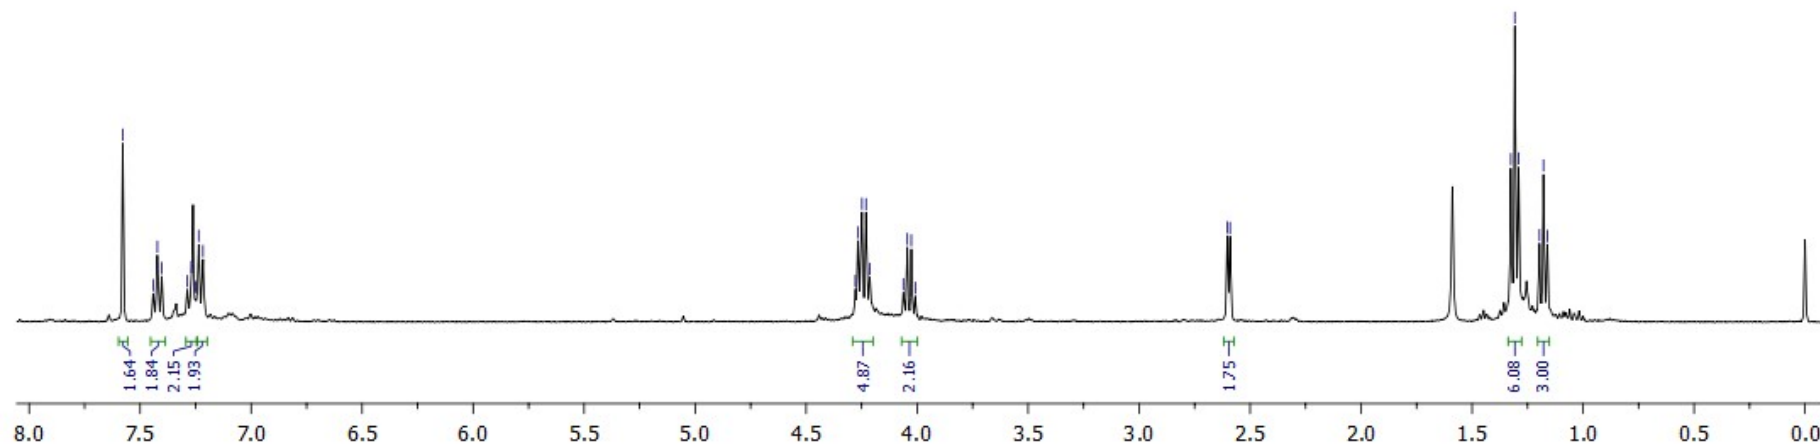

$^1\text{H}$  NMR (400.1 MHz,  $\text{CDCl}_3$ )

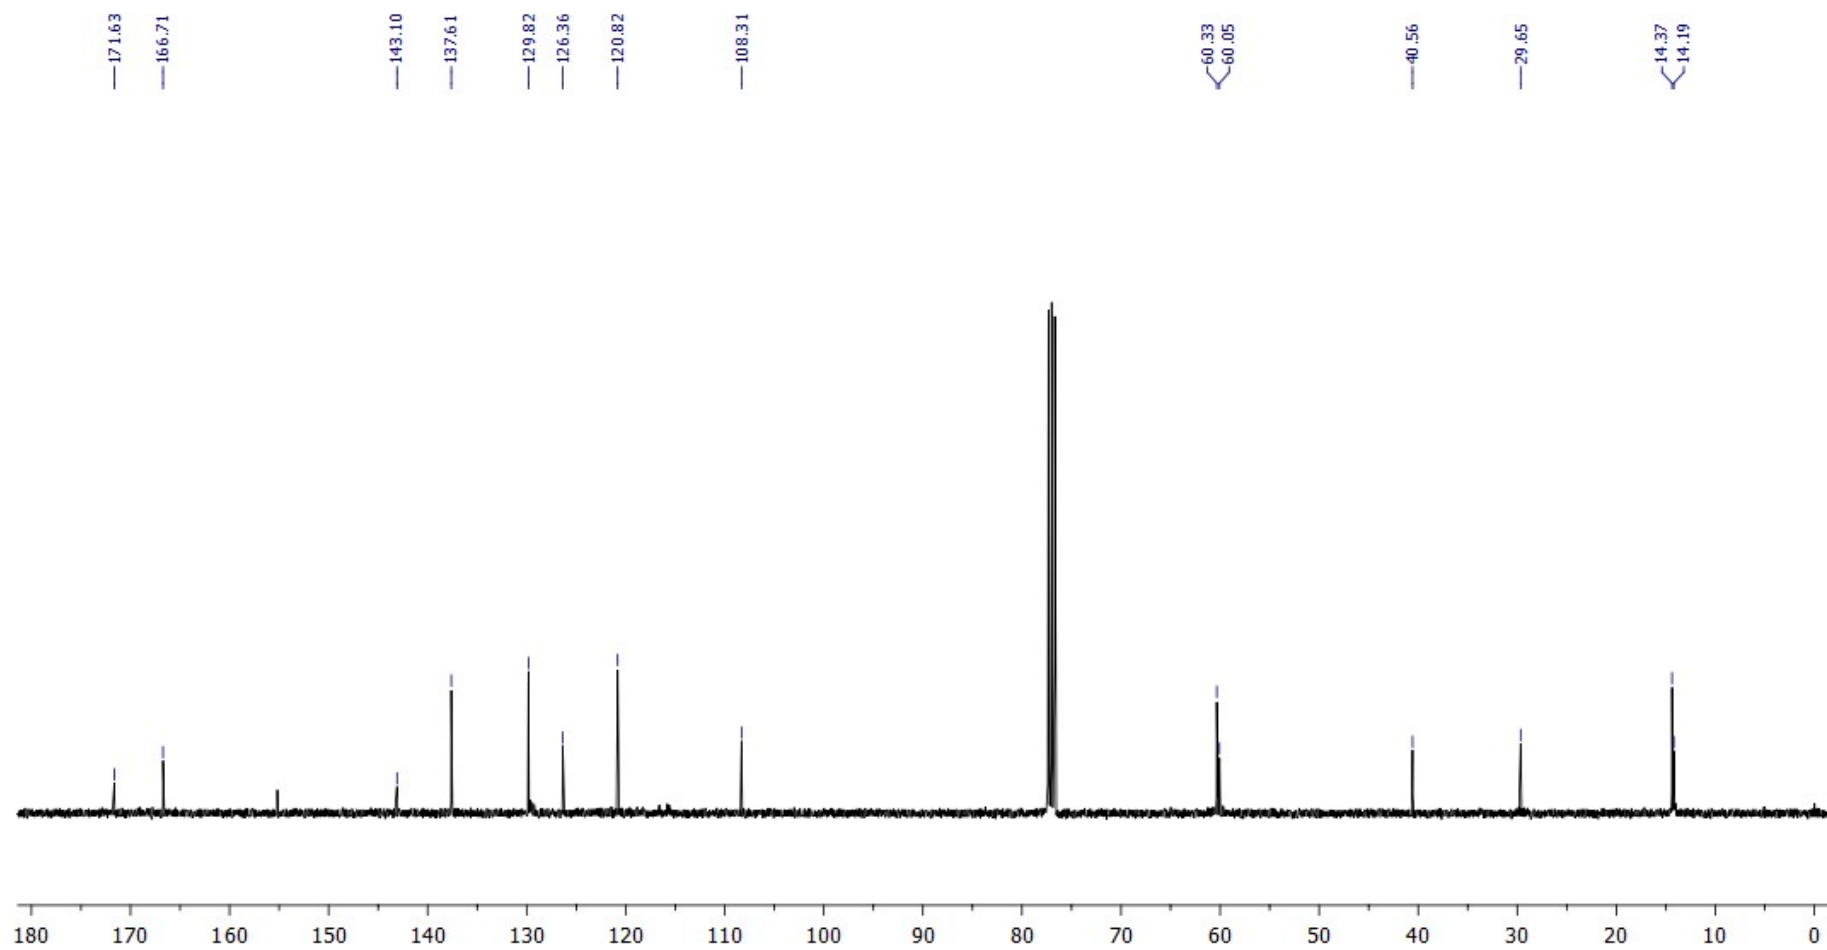

$^{13}\text{C}\{^1\text{H}\}$  NMR (100.6 MHz,  $\text{CDCl}_3$ )

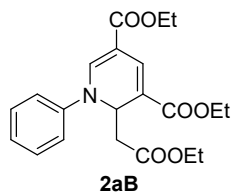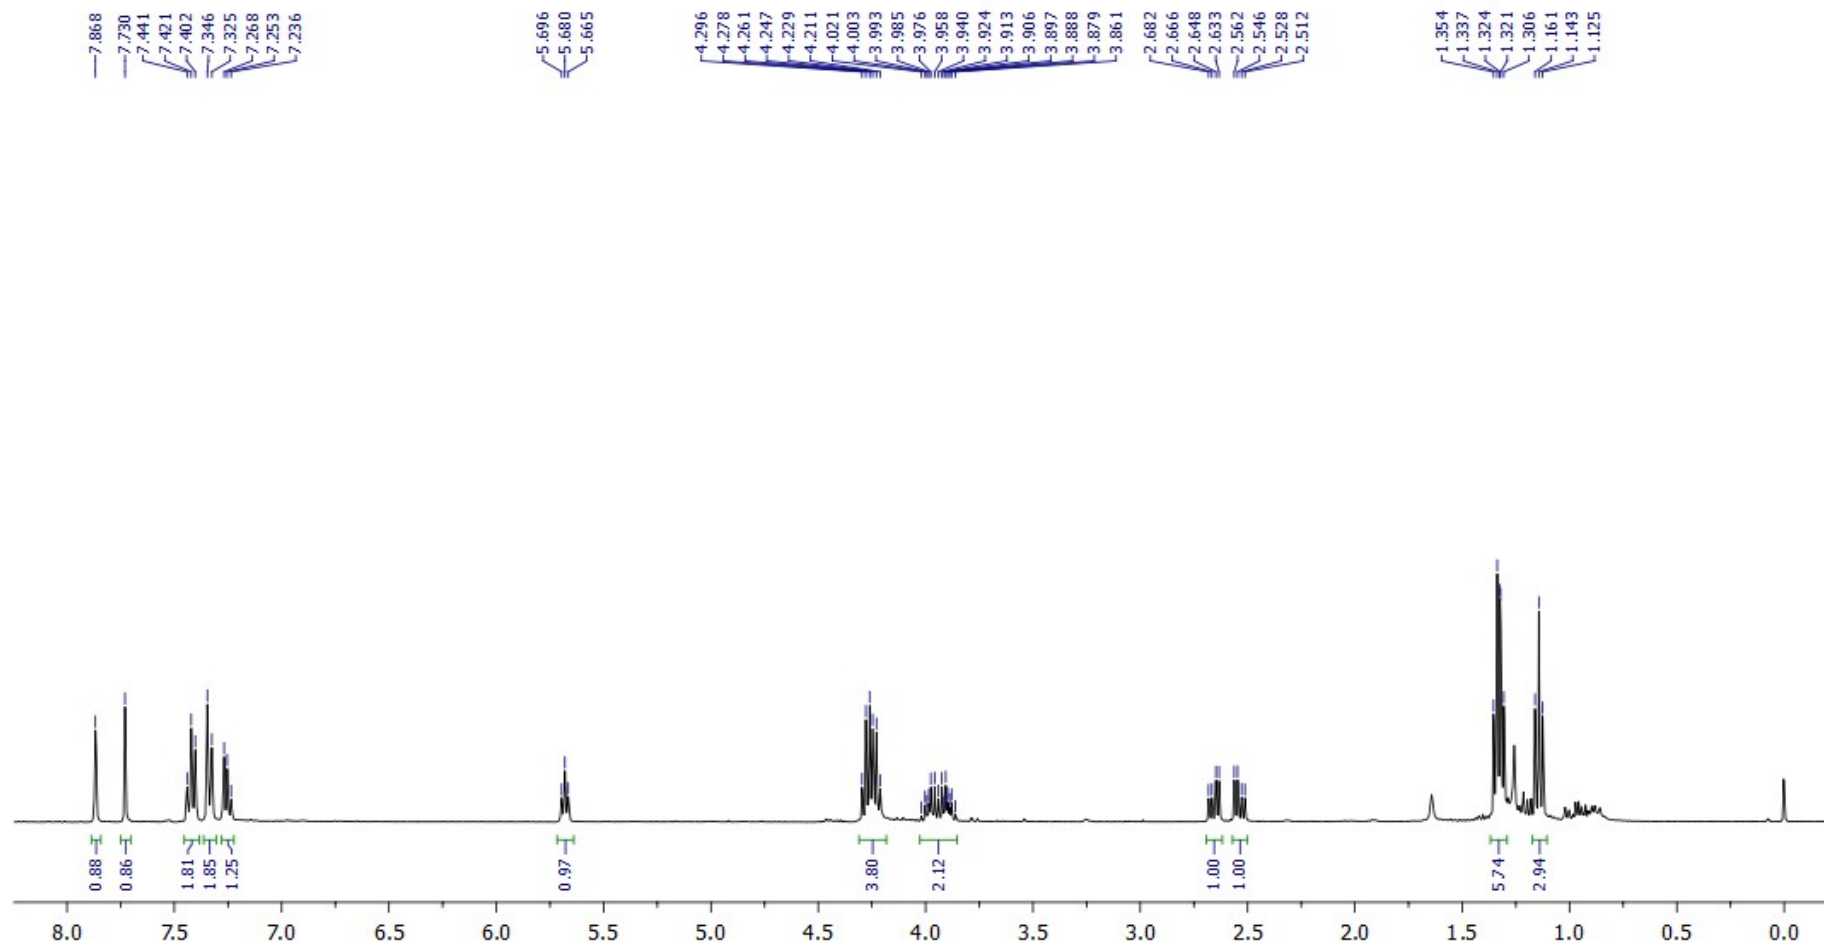

$^1\text{H NMR}$  (400.1 MHz,  $\text{CDCl}_3$ )

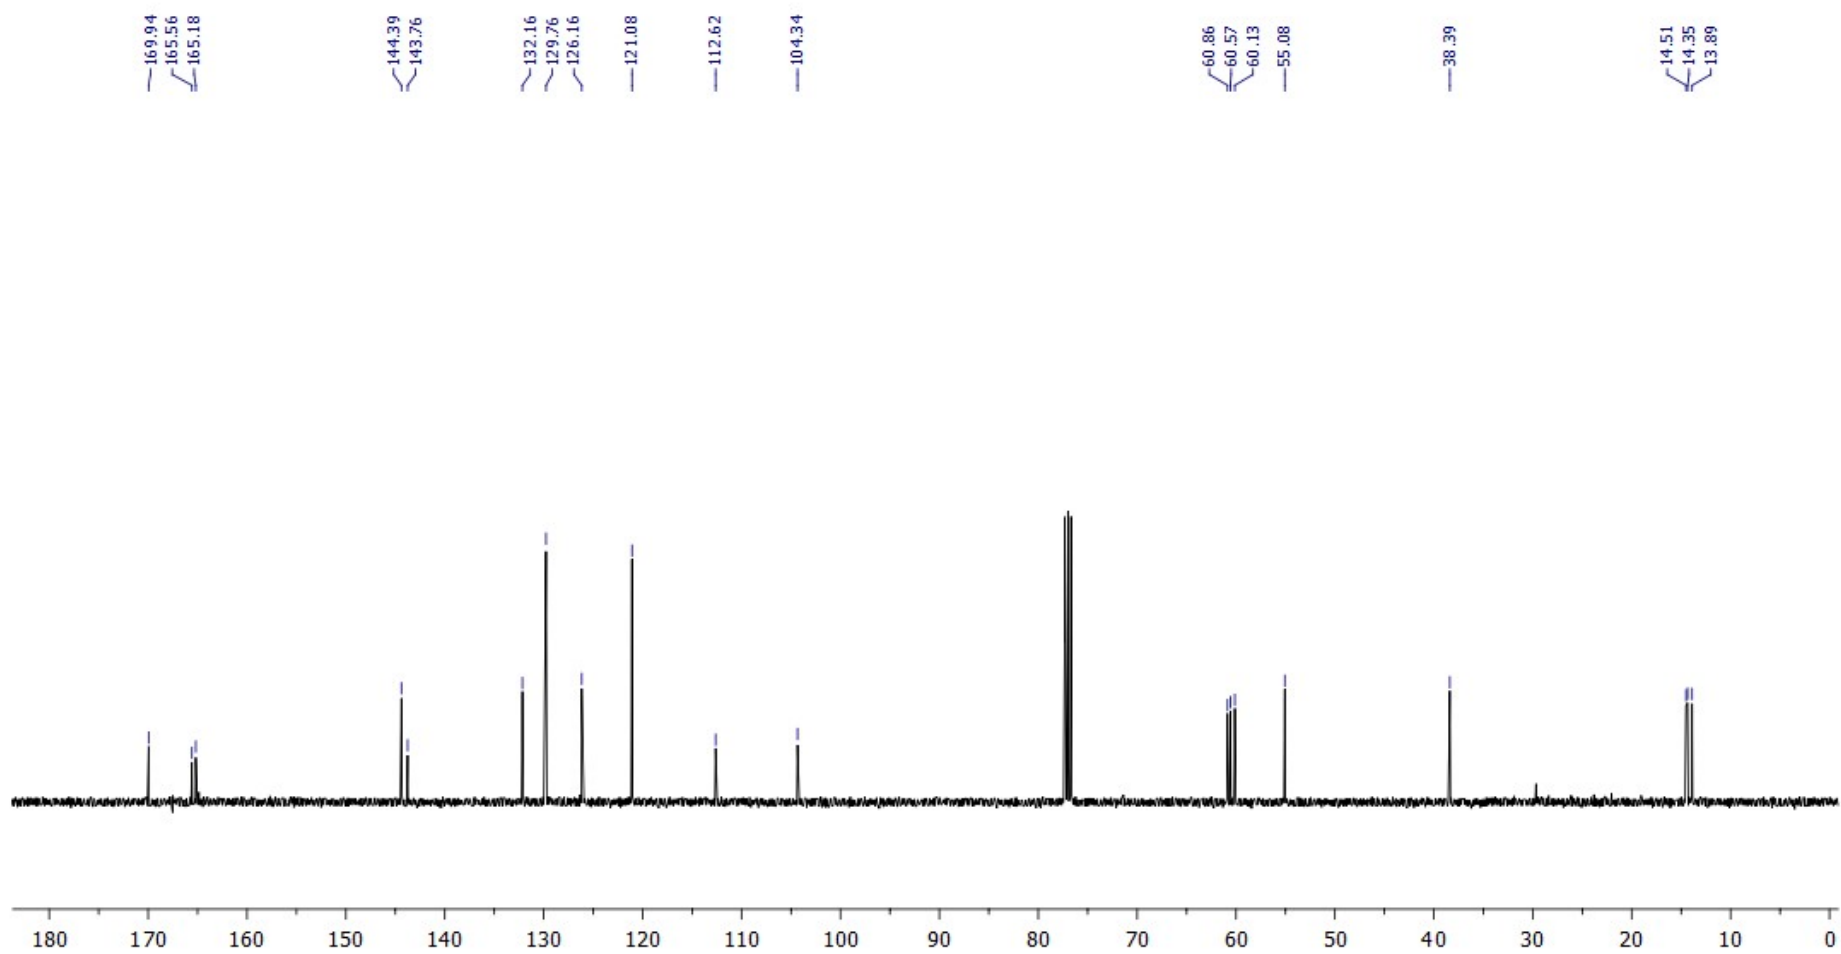

$^{13}\text{C}\{^1\text{H}\}$  NMR (100.6 MHz,  $\text{CDCl}_3$ )

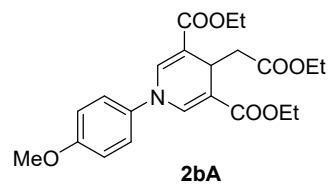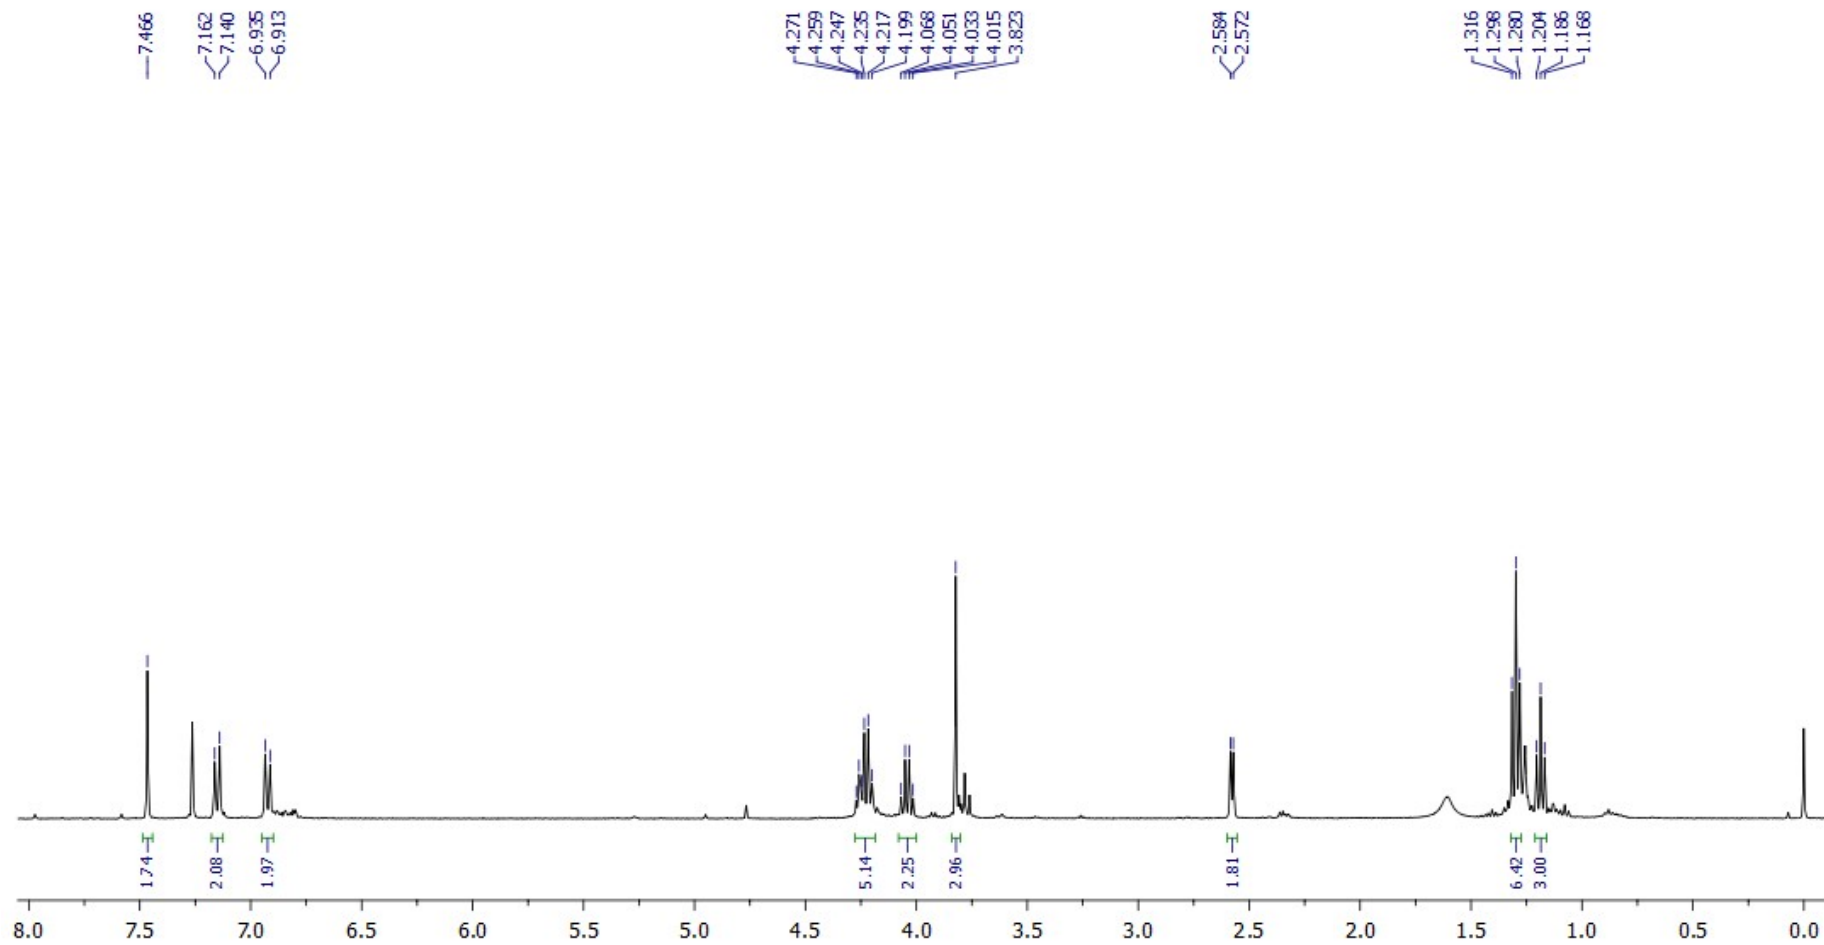

<sup>1</sup>H NMR (400.1 MHz, CDCl<sub>3</sub>)



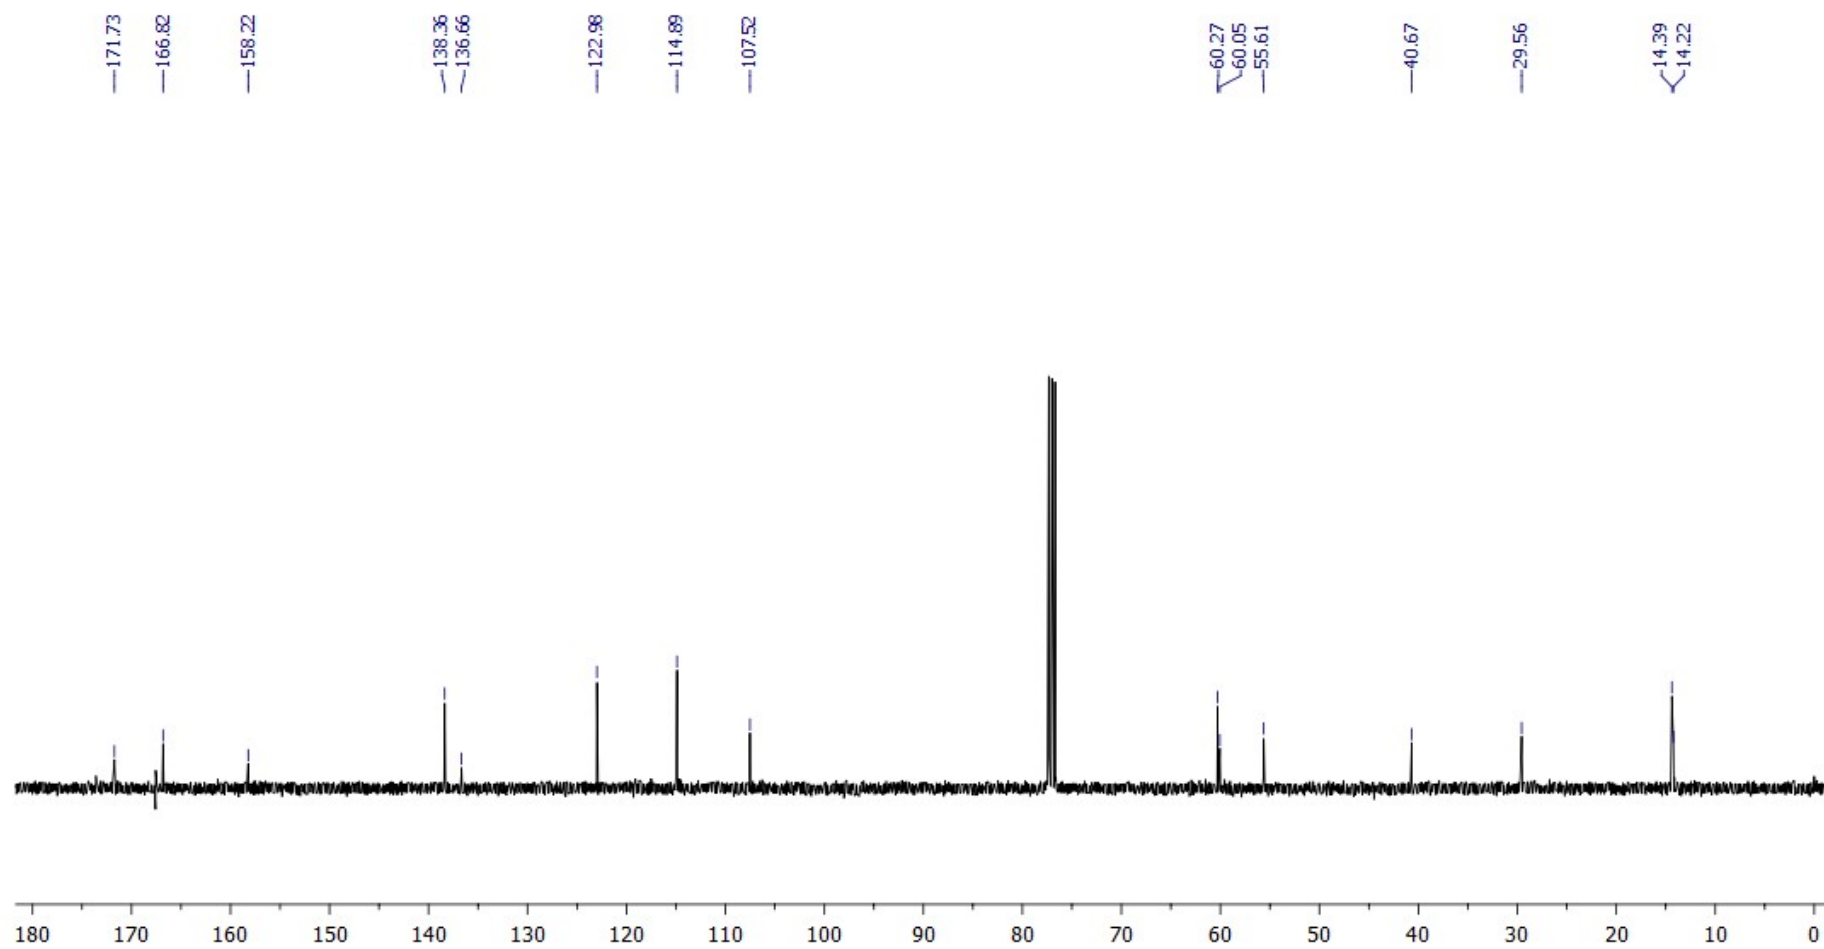

$^{13}\text{C}\{^1\text{H}\}$  NMR (100.6 MHz,  $\text{CDCl}_3$ )

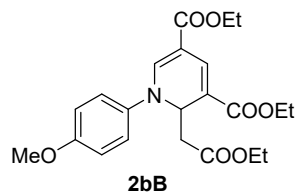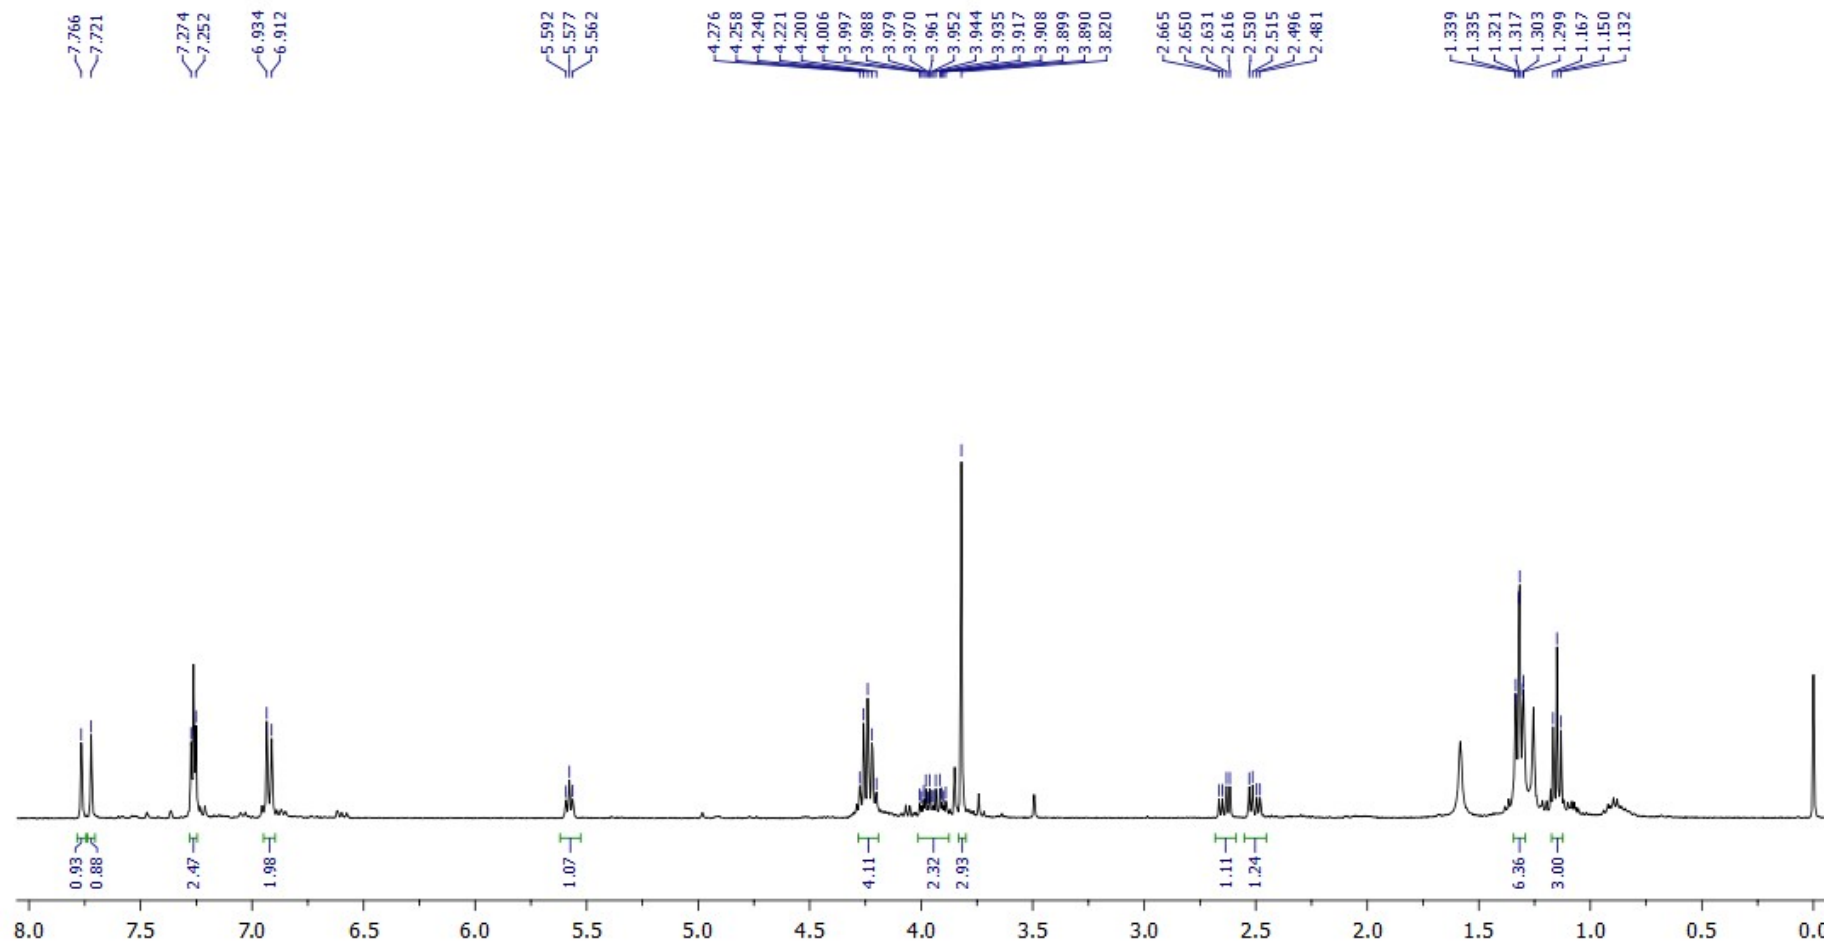

<sup>1</sup>H NMR (400.1 MHz, CDCl<sub>3</sub>)

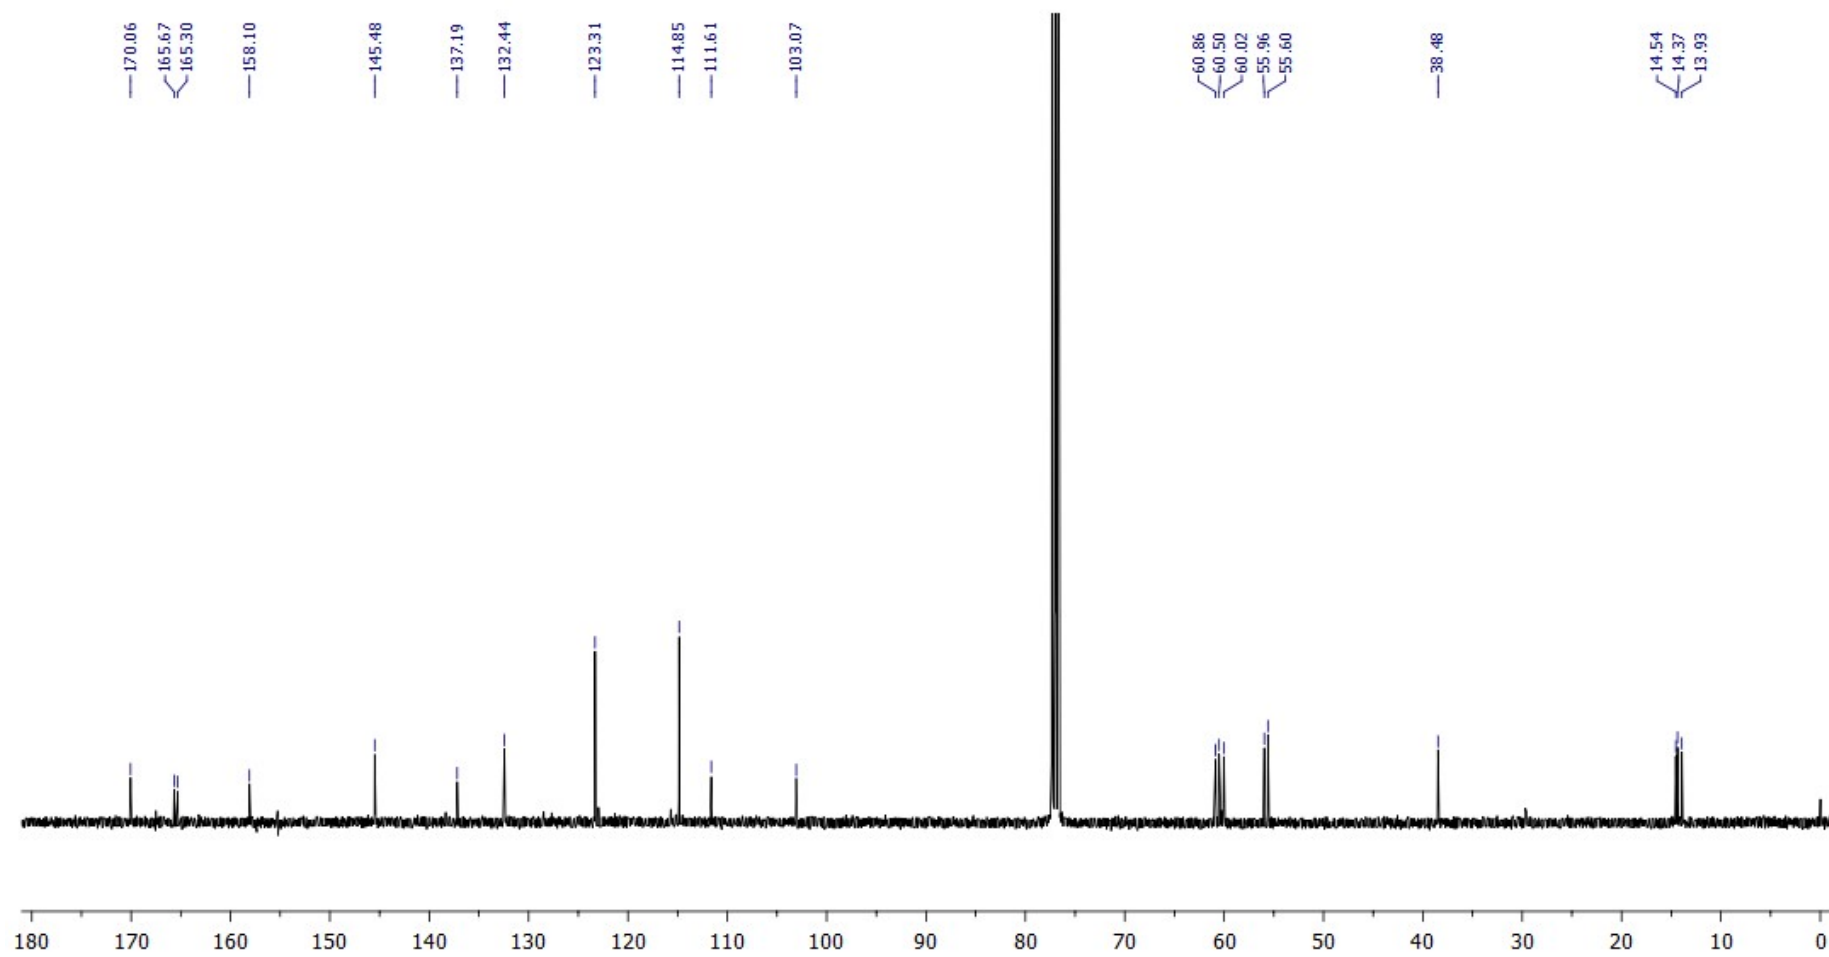

$^{13}\text{C}\{^1\text{H}\}$  NMR (100.6 MHz,  $\text{CDCl}_3$ )

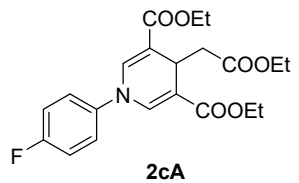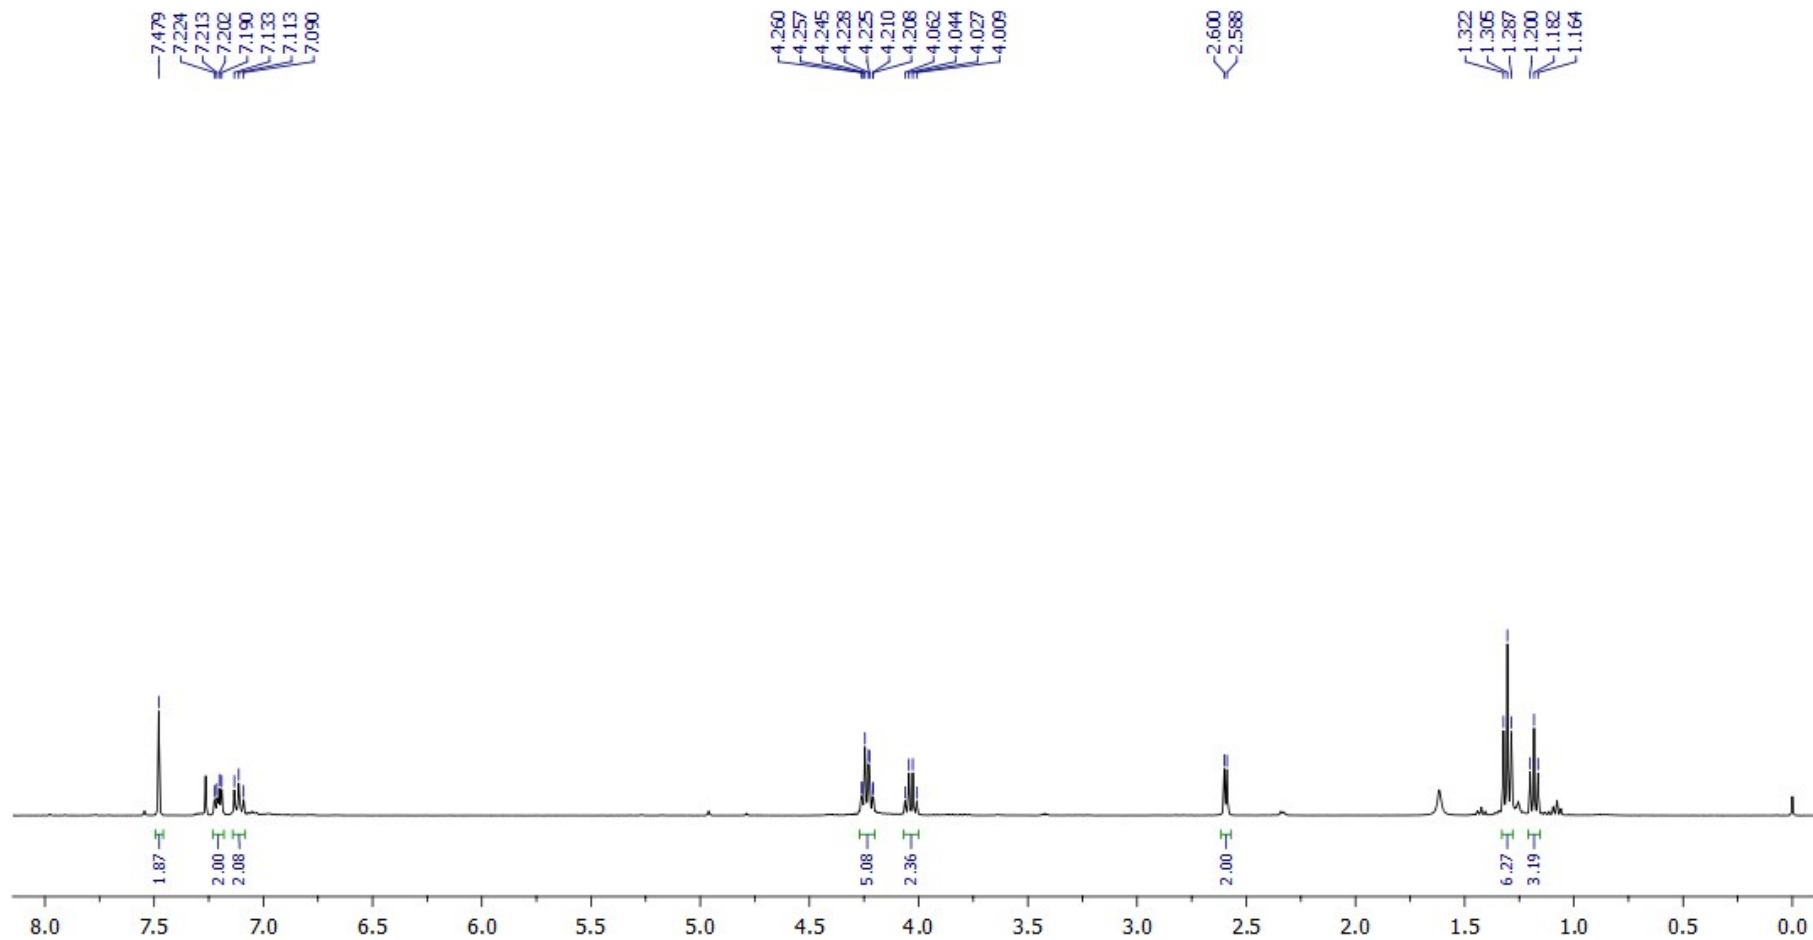

$^1\text{H NMR}$  (400.1 MHz,  $\text{CDCl}_3$ )

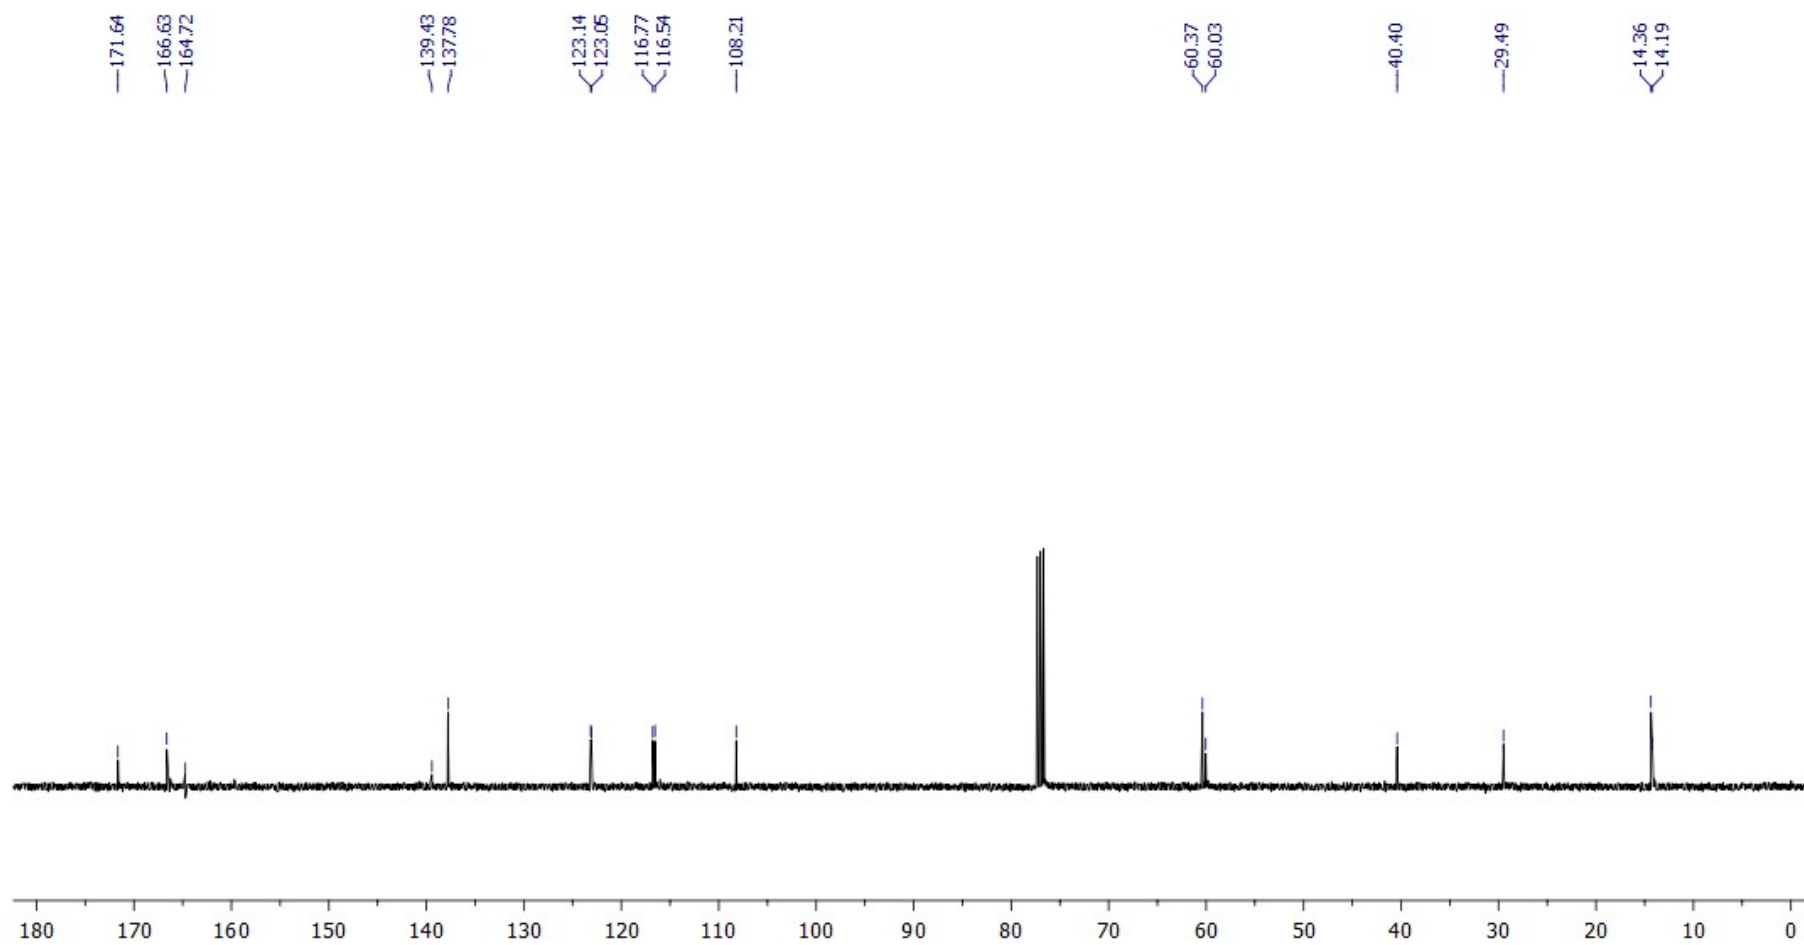

$^{13}\text{C}\{^1\text{H}\}$  NMR (100.6 MHz,  $\text{CDCl}_3$ )

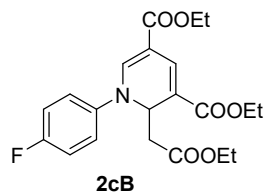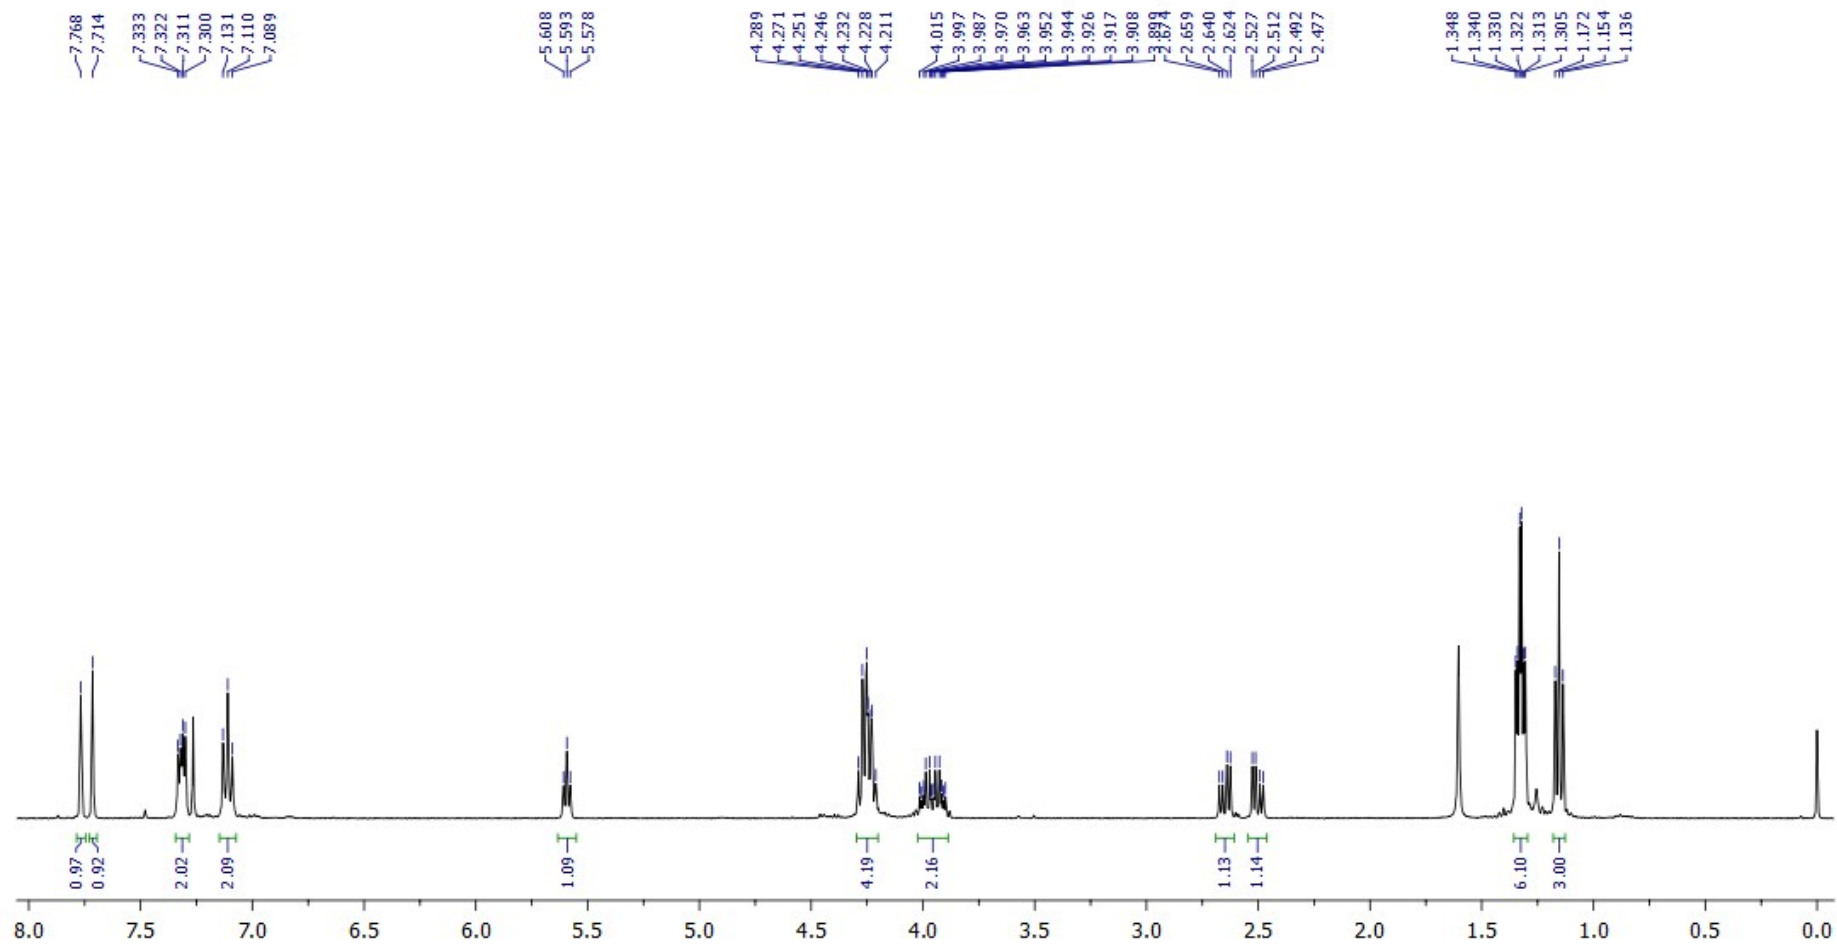

$^1\text{H NMR}$  (400.1 MHz,  $\text{CDCl}_3$ )

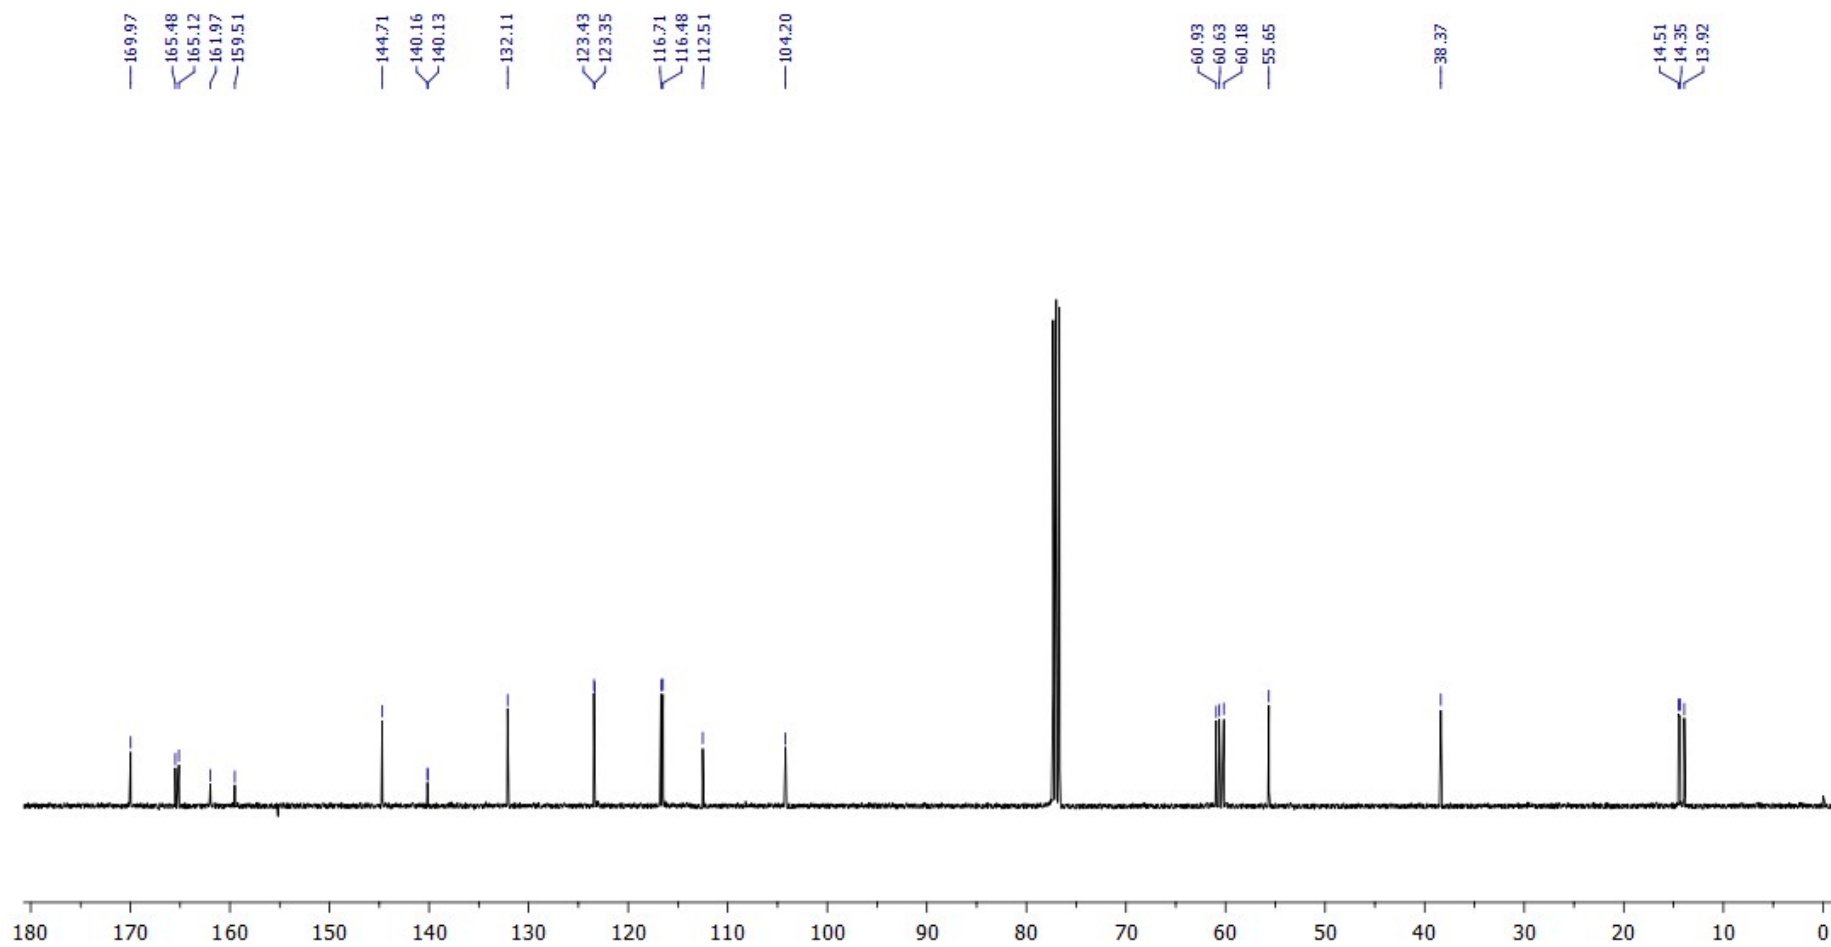

$^{13}\text{C}\{^1\text{H}\}$  NMR (100.6 MHz,  $\text{CDCl}_3$ )

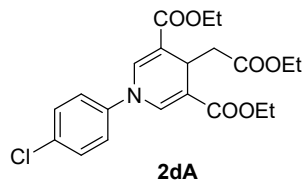

7.515  
7.398  
7.376  
7.179  
7.157

4.279  
4.270  
4.266  
4.252  
4.248  
4.241  
4.234  
4.230  
4.217  
4.213  
4.203  
4.052  
4.035  
4.017  
3.999

2.604  
2.592

1.326  
1.309  
1.291  
1.192  
1.174  
1.156

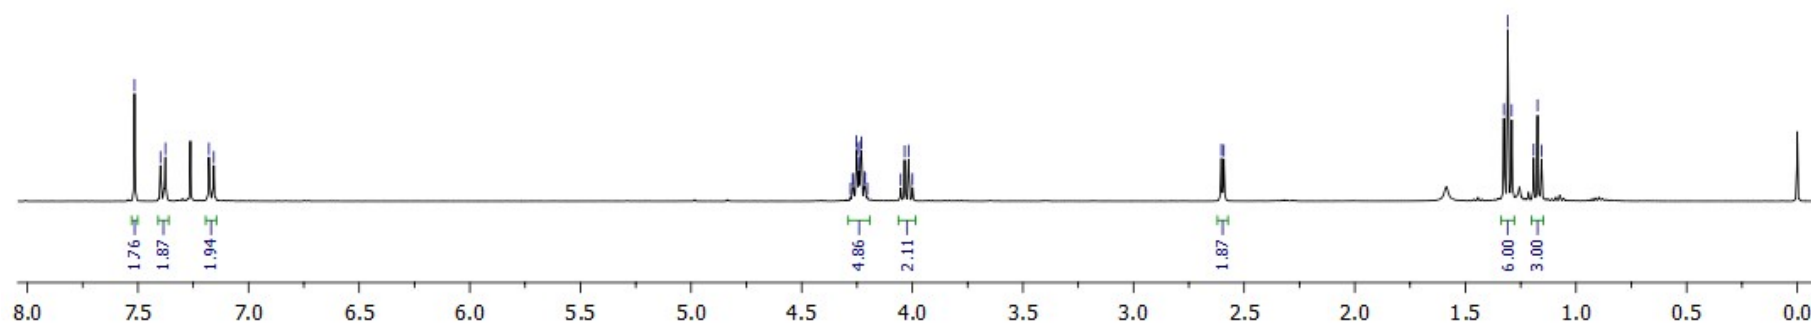

$^1\text{H}$  NMR (400.1 MHz,  $\text{CDCl}_3$ )



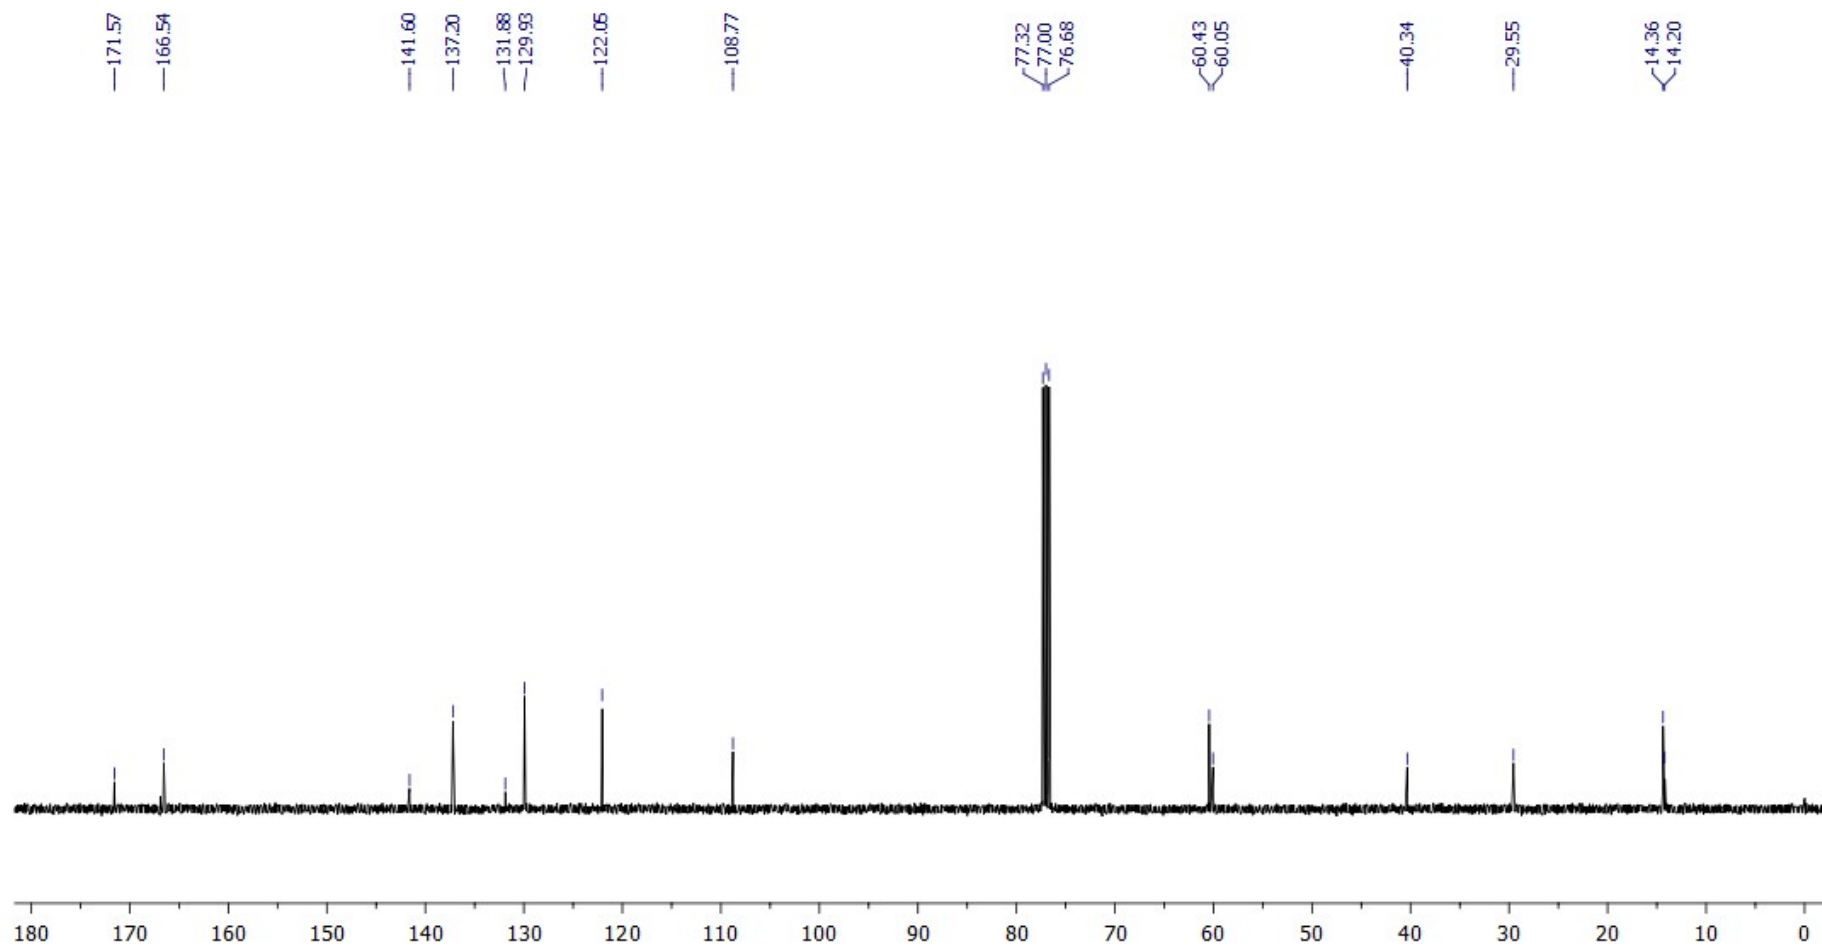

$^{13}\text{C}\{^1\text{H}\}$  NMR (100.6 MHz,  $\text{CDCl}_3$ )

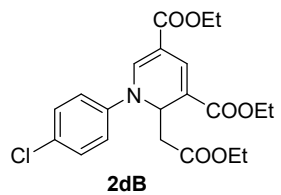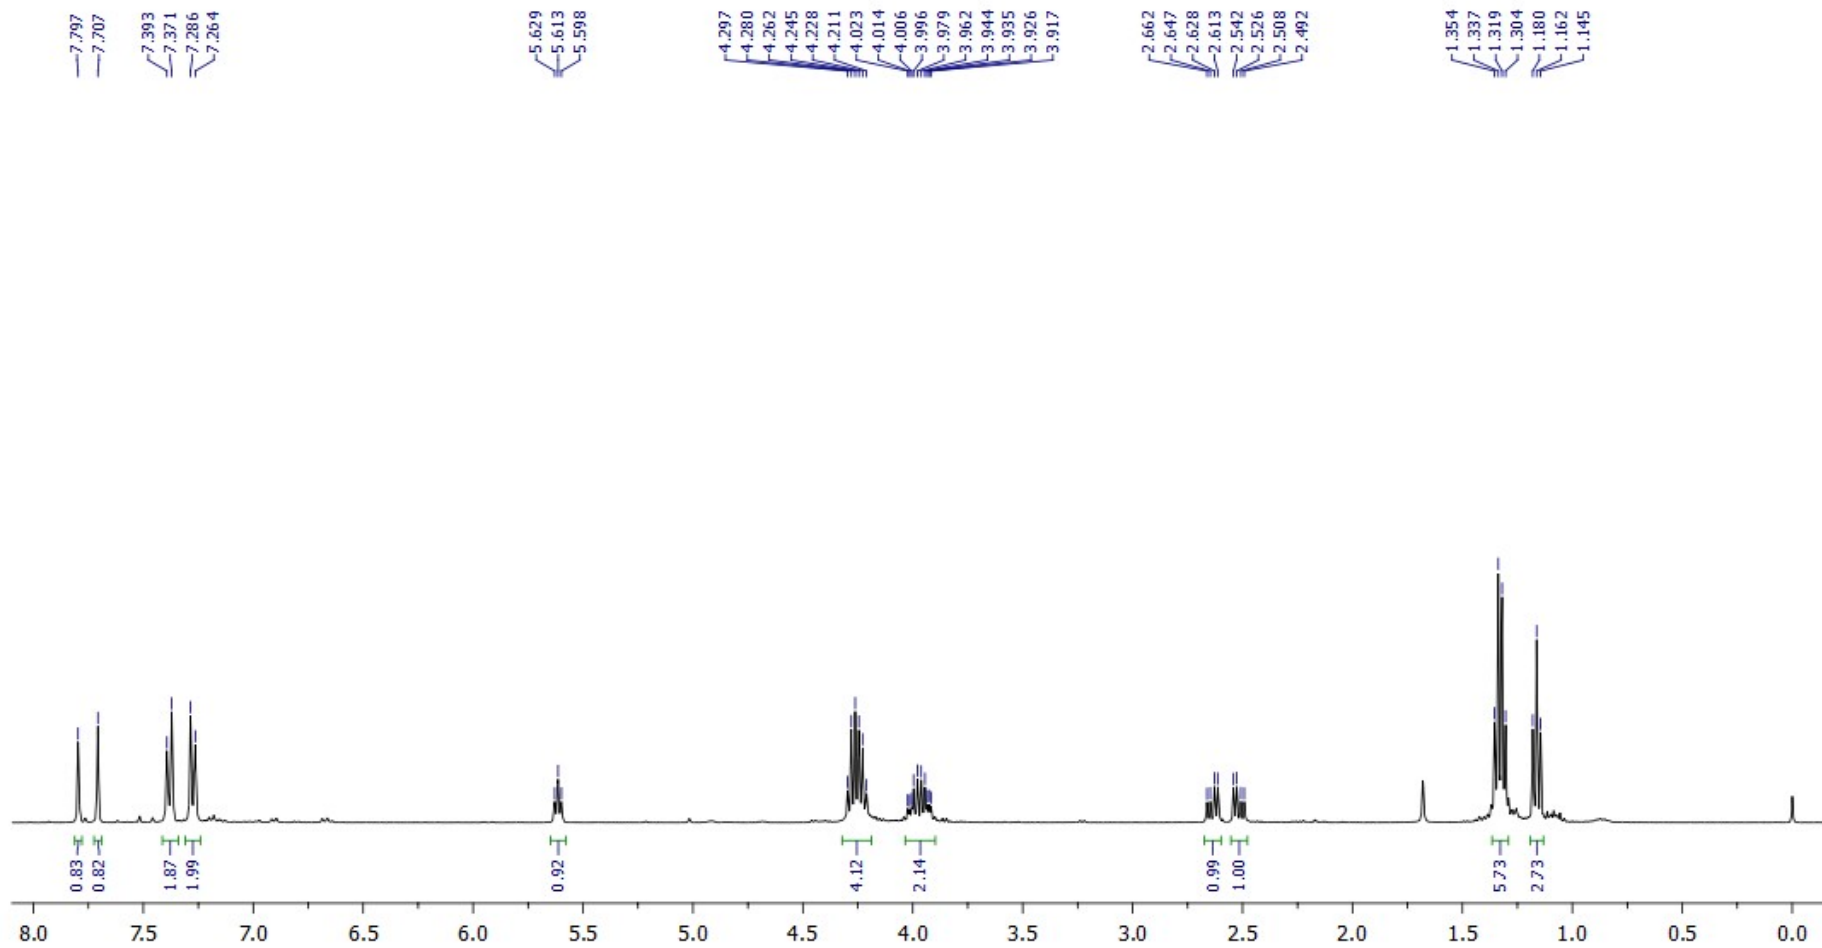

<sup>1</sup>H NMR (400.1 MHz, CDCl<sub>3</sub>)

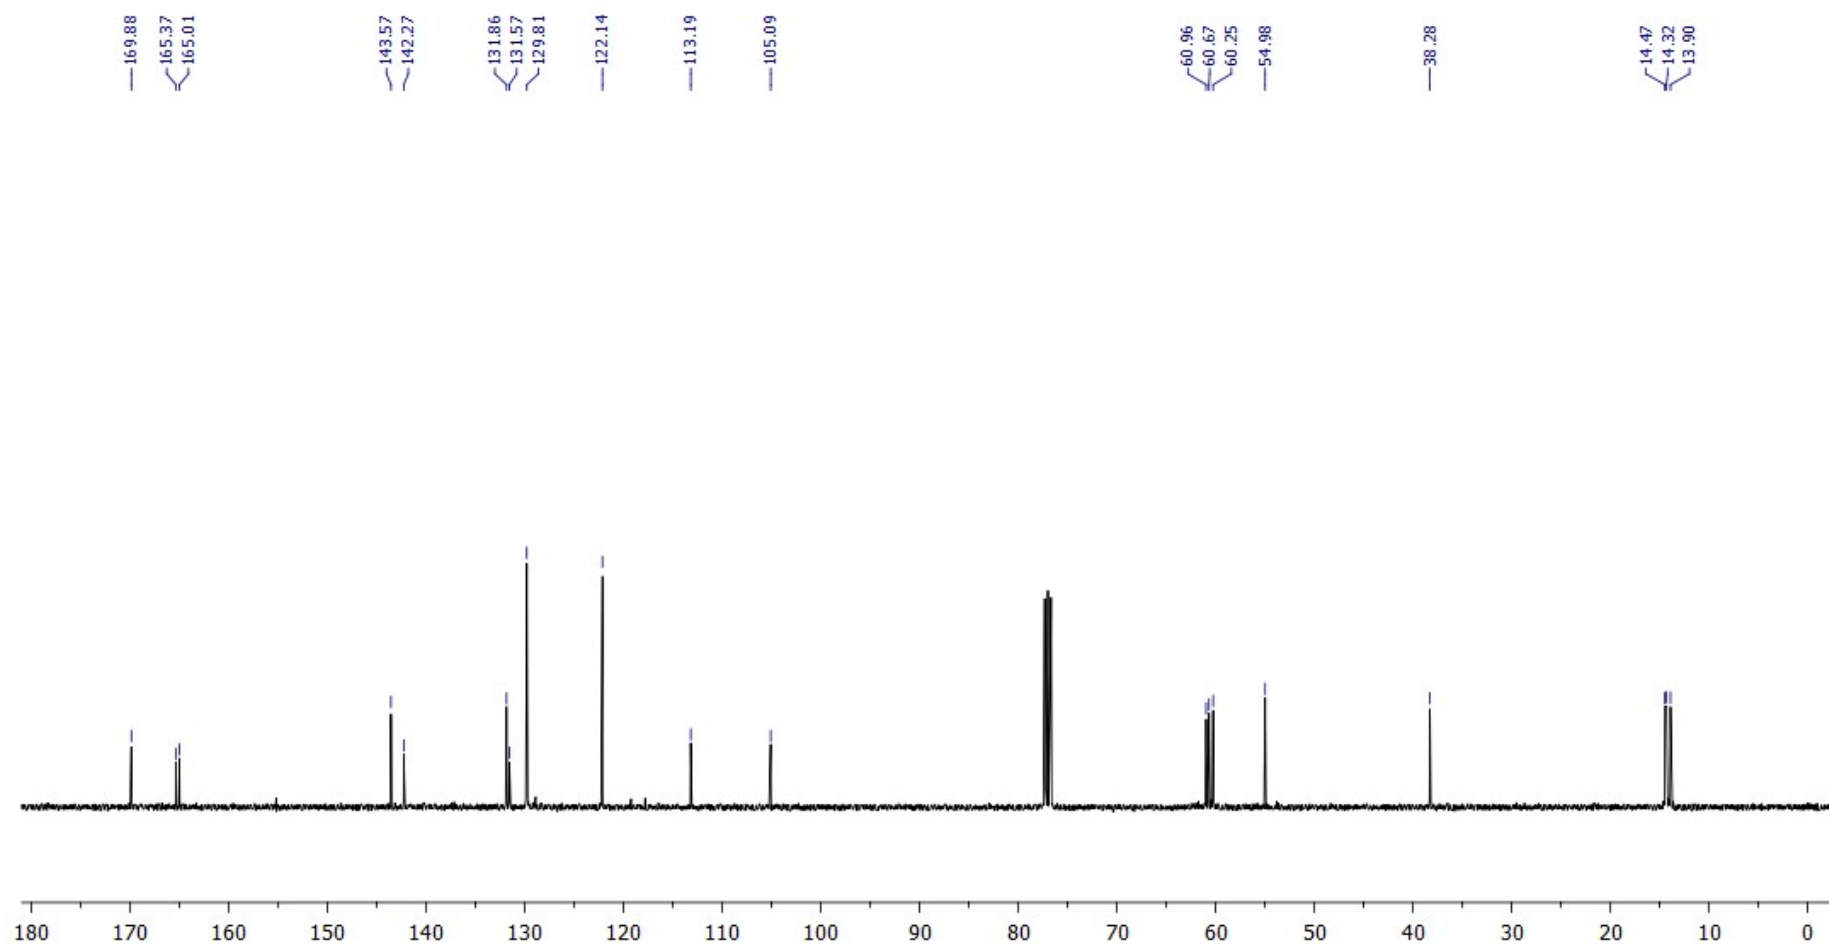

$^{13}\text{C}\{^1\text{H}\}$  NMR (100.6 MHz,  $\text{CDCl}_3$ )

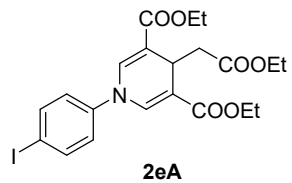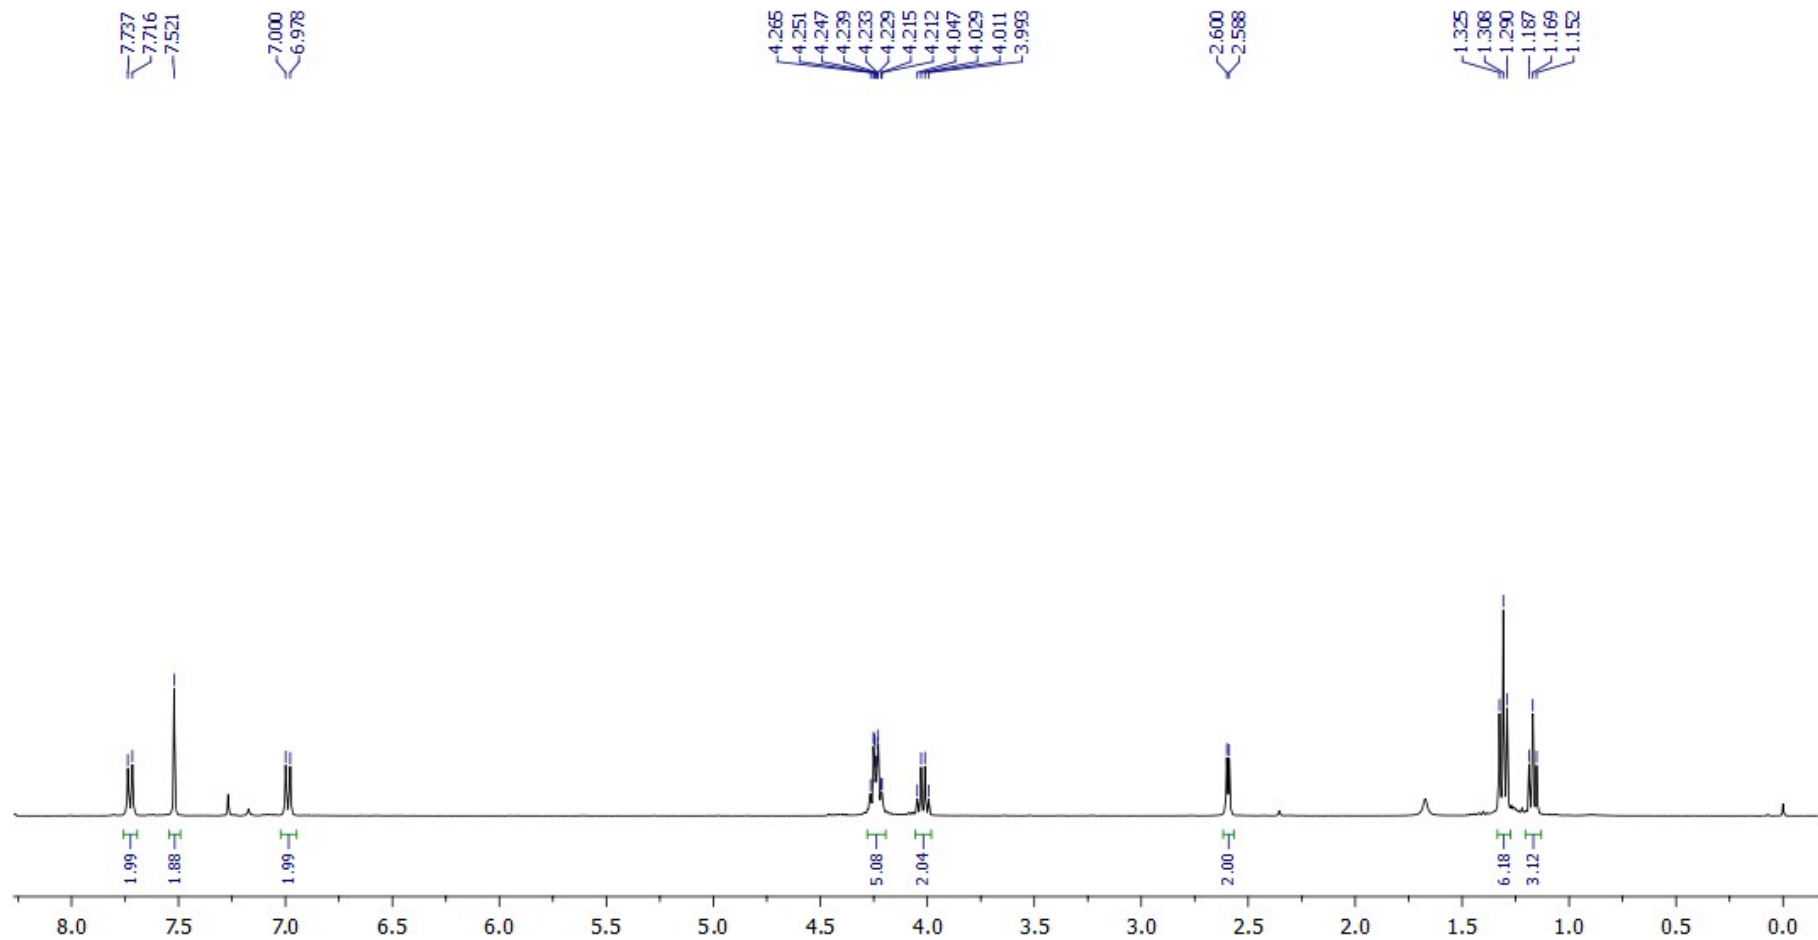

$^1\text{H}$  NMR (400.1 MHz,  $\text{CDCl}_3$ )

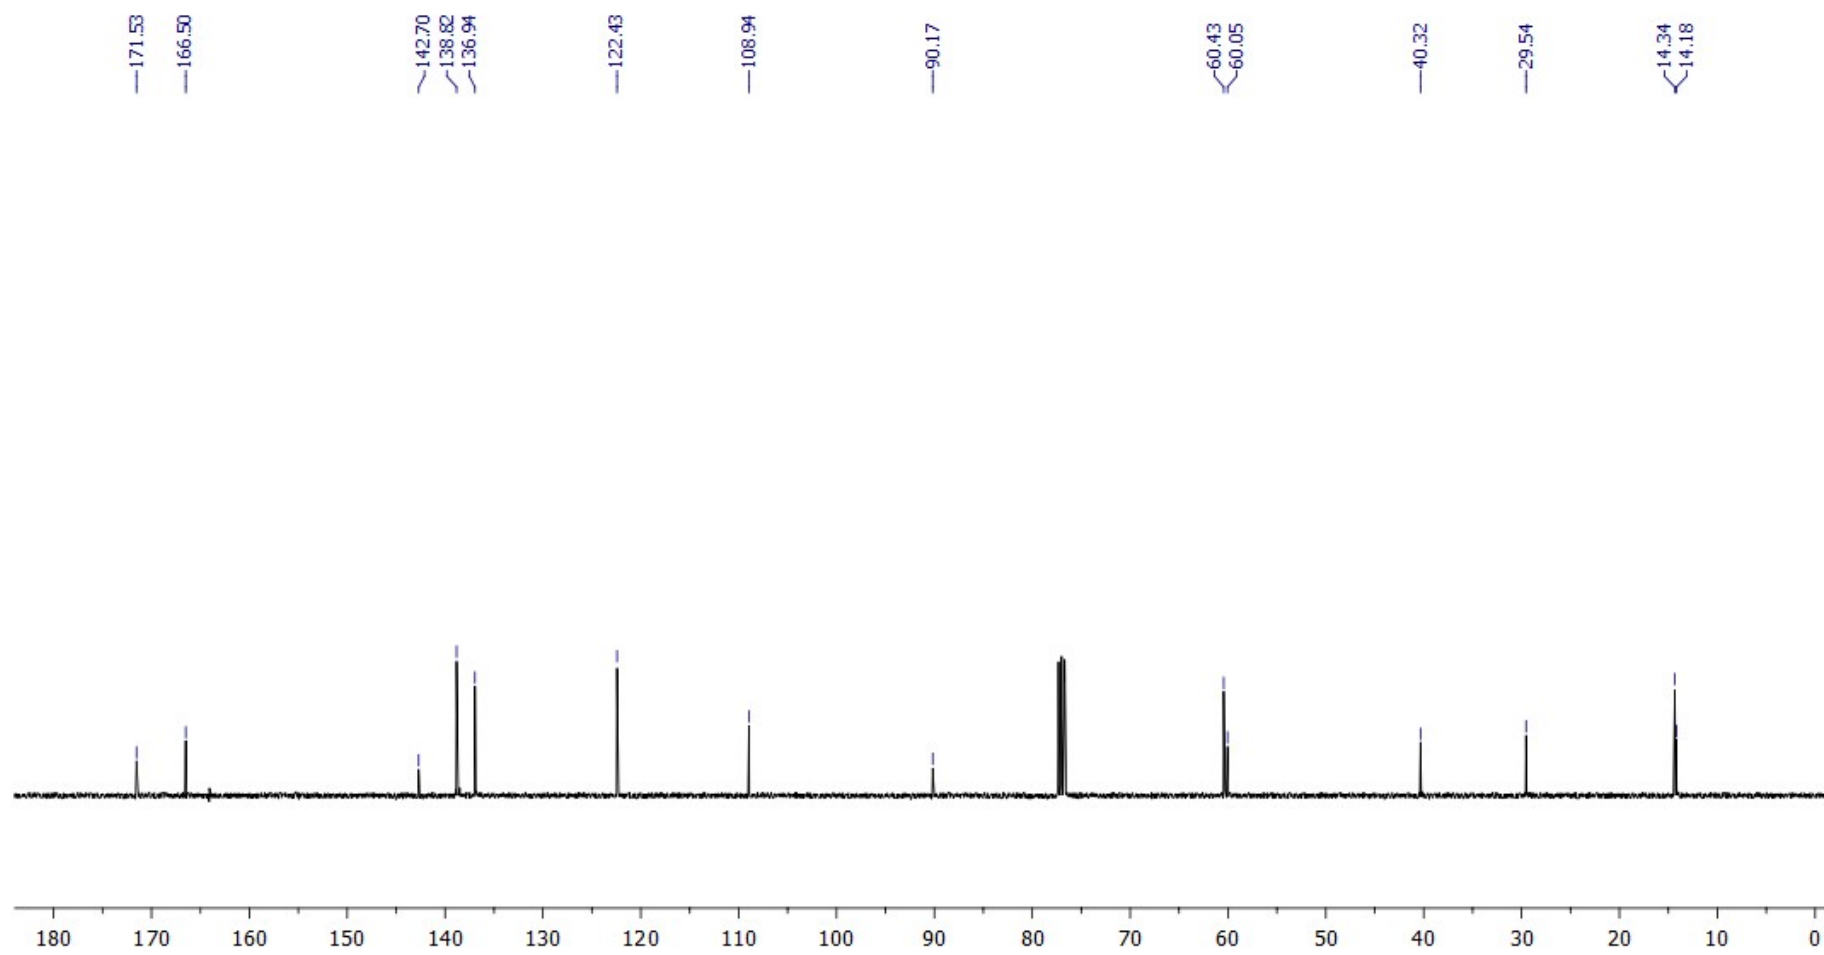

$^{13}\text{C}\{^1\text{H}\}$  NMR (100.6 MHz,  $\text{CDCl}_3$ )

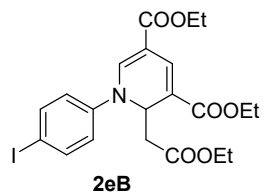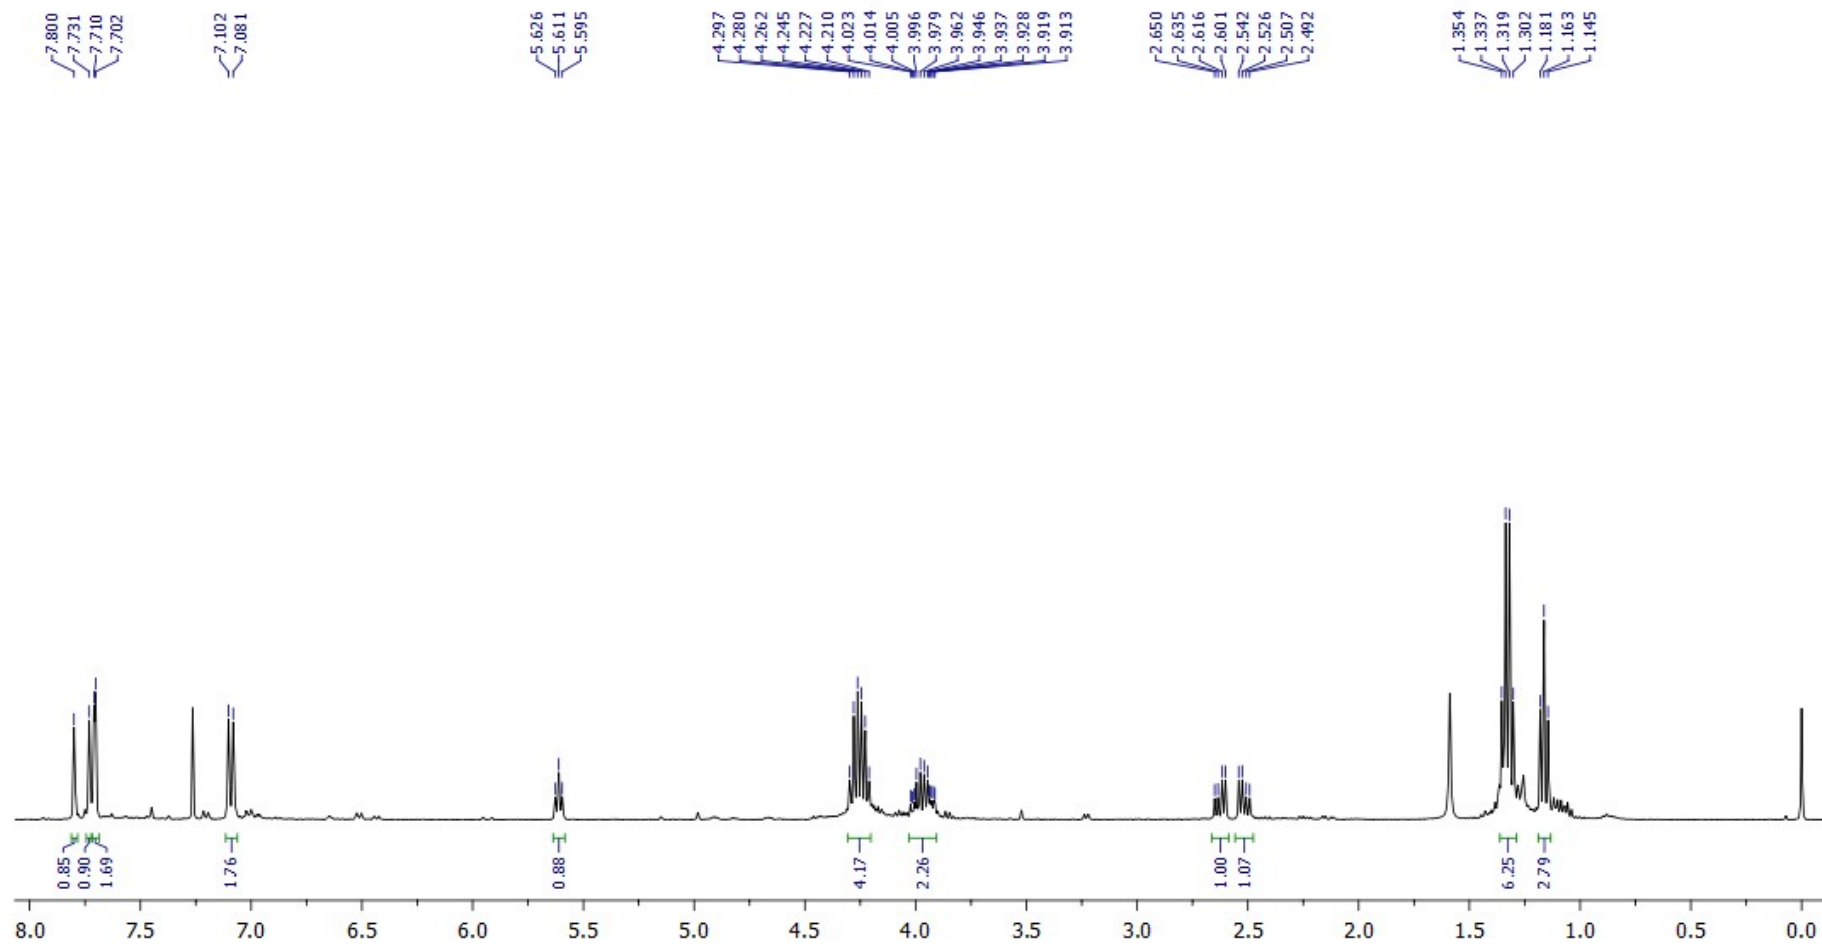

$^1\text{H NMR}$  (400.1 MHz,  $\text{CDCl}_3$ )

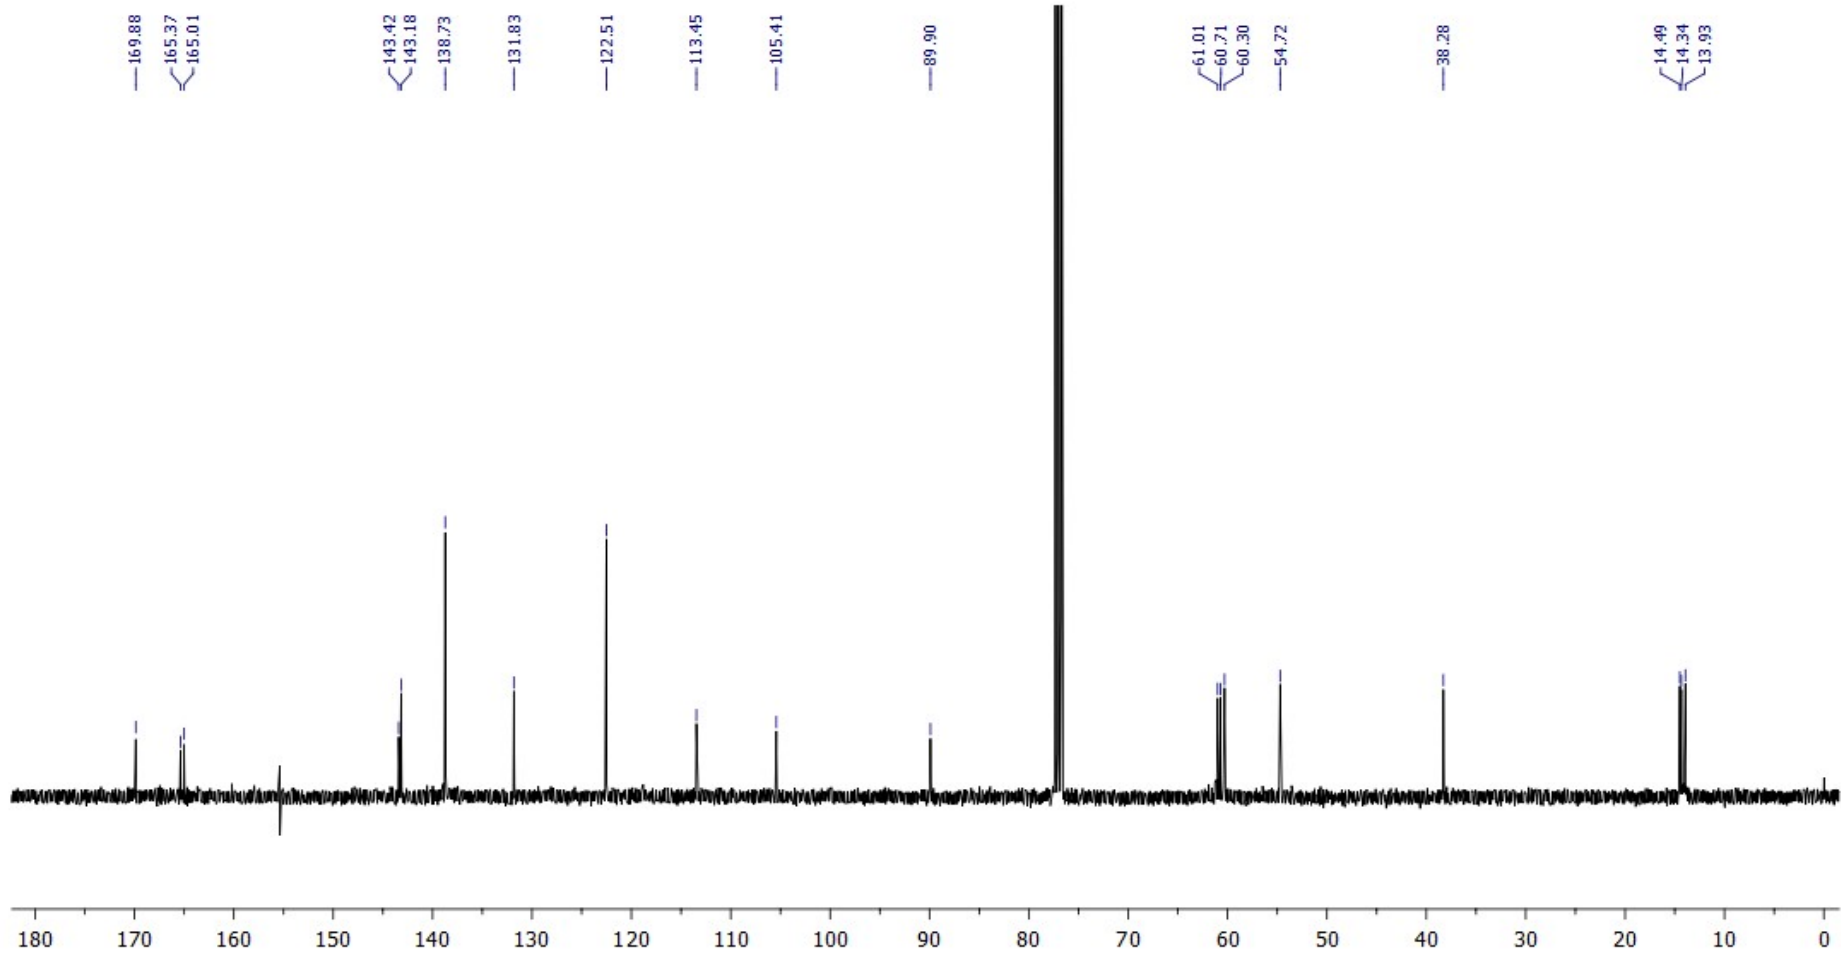

$^{13}\text{C}\{^1\text{H}\}$  NMR (100.6 MHz,  $\text{CDCl}_3$ )

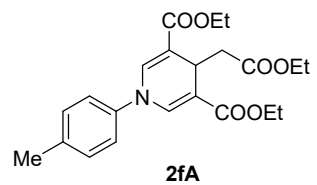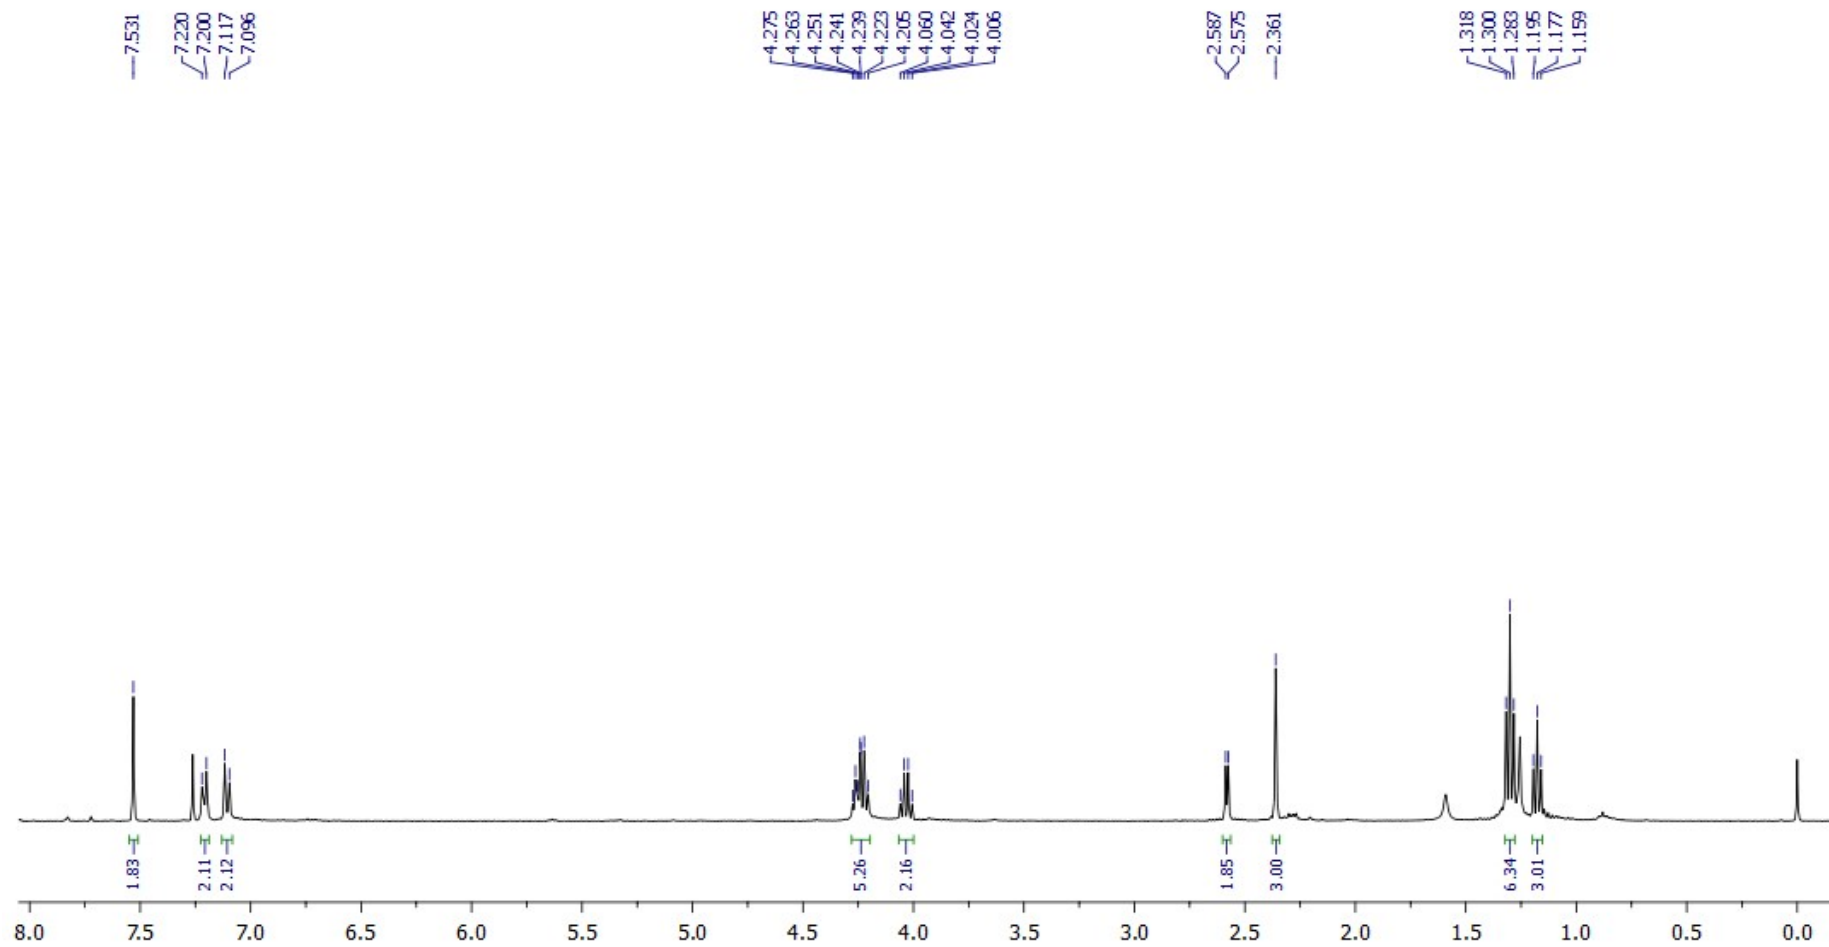

$^1\text{H NMR}$  (400.1 MHz,  $\text{CDCl}_3$ )



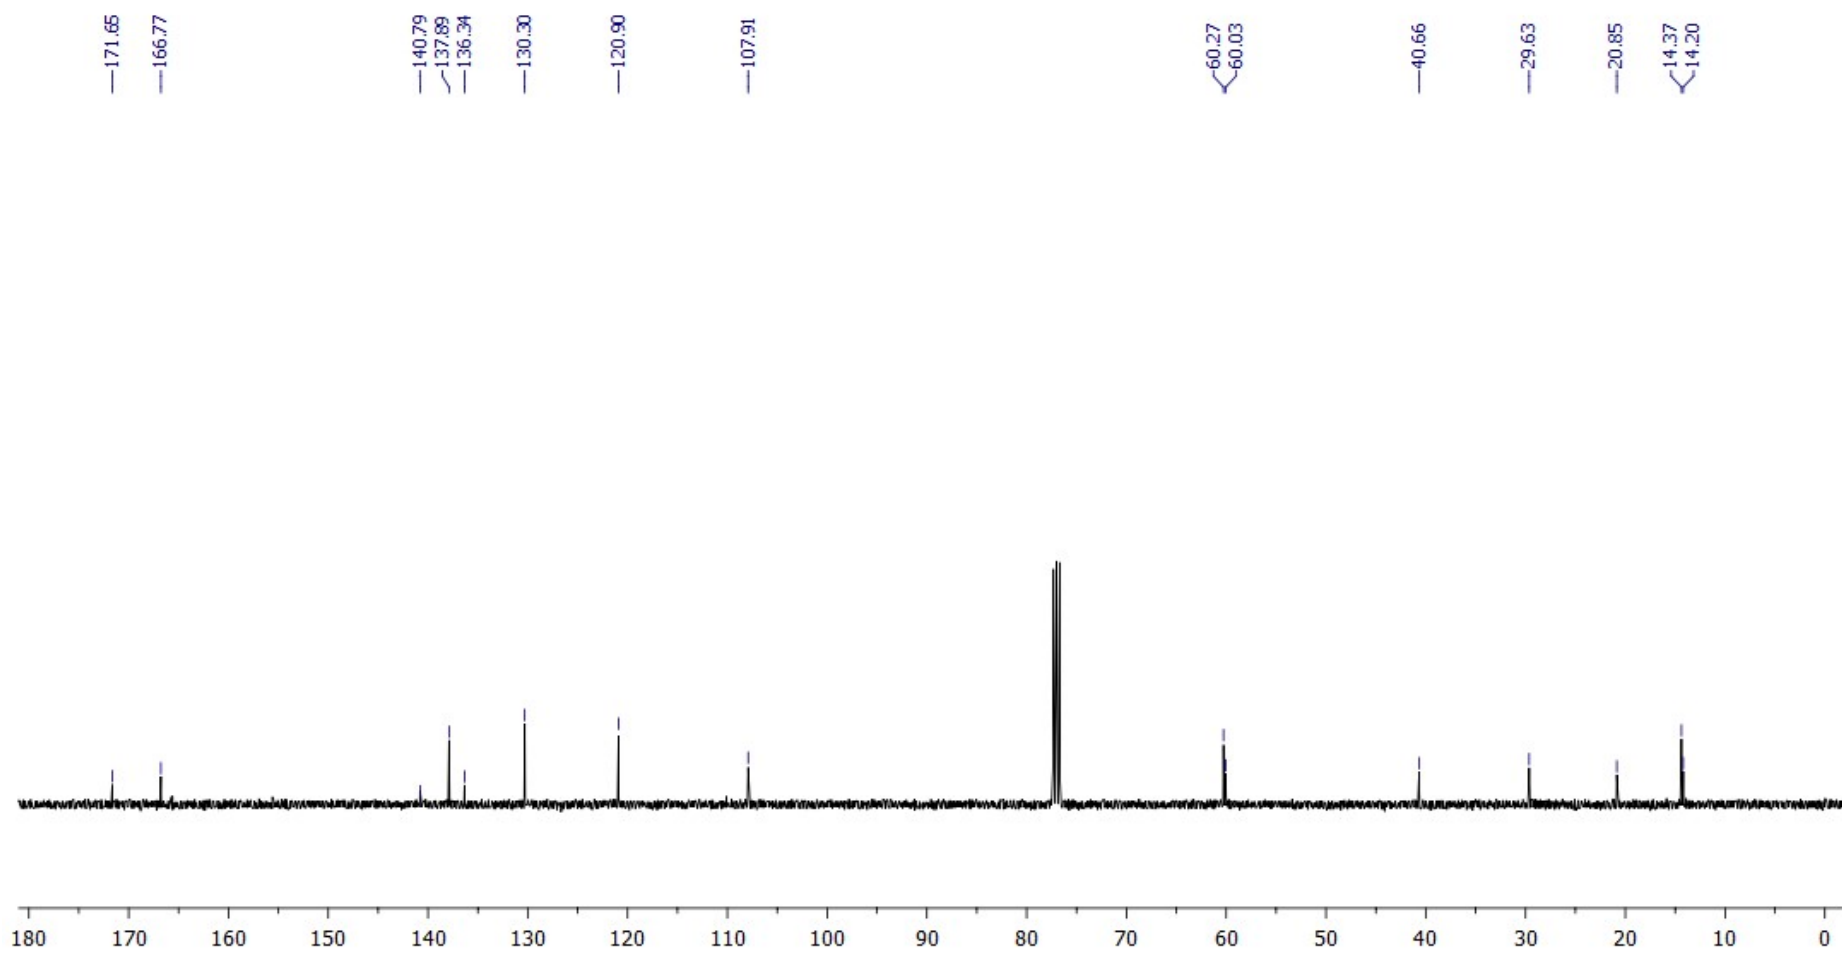

$^{13}\text{C}\{^1\text{H}\}$  NMR (100.6 MHz,  $\text{CDCl}_3$ )

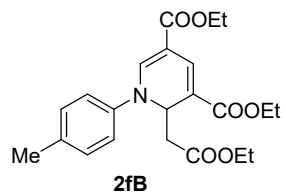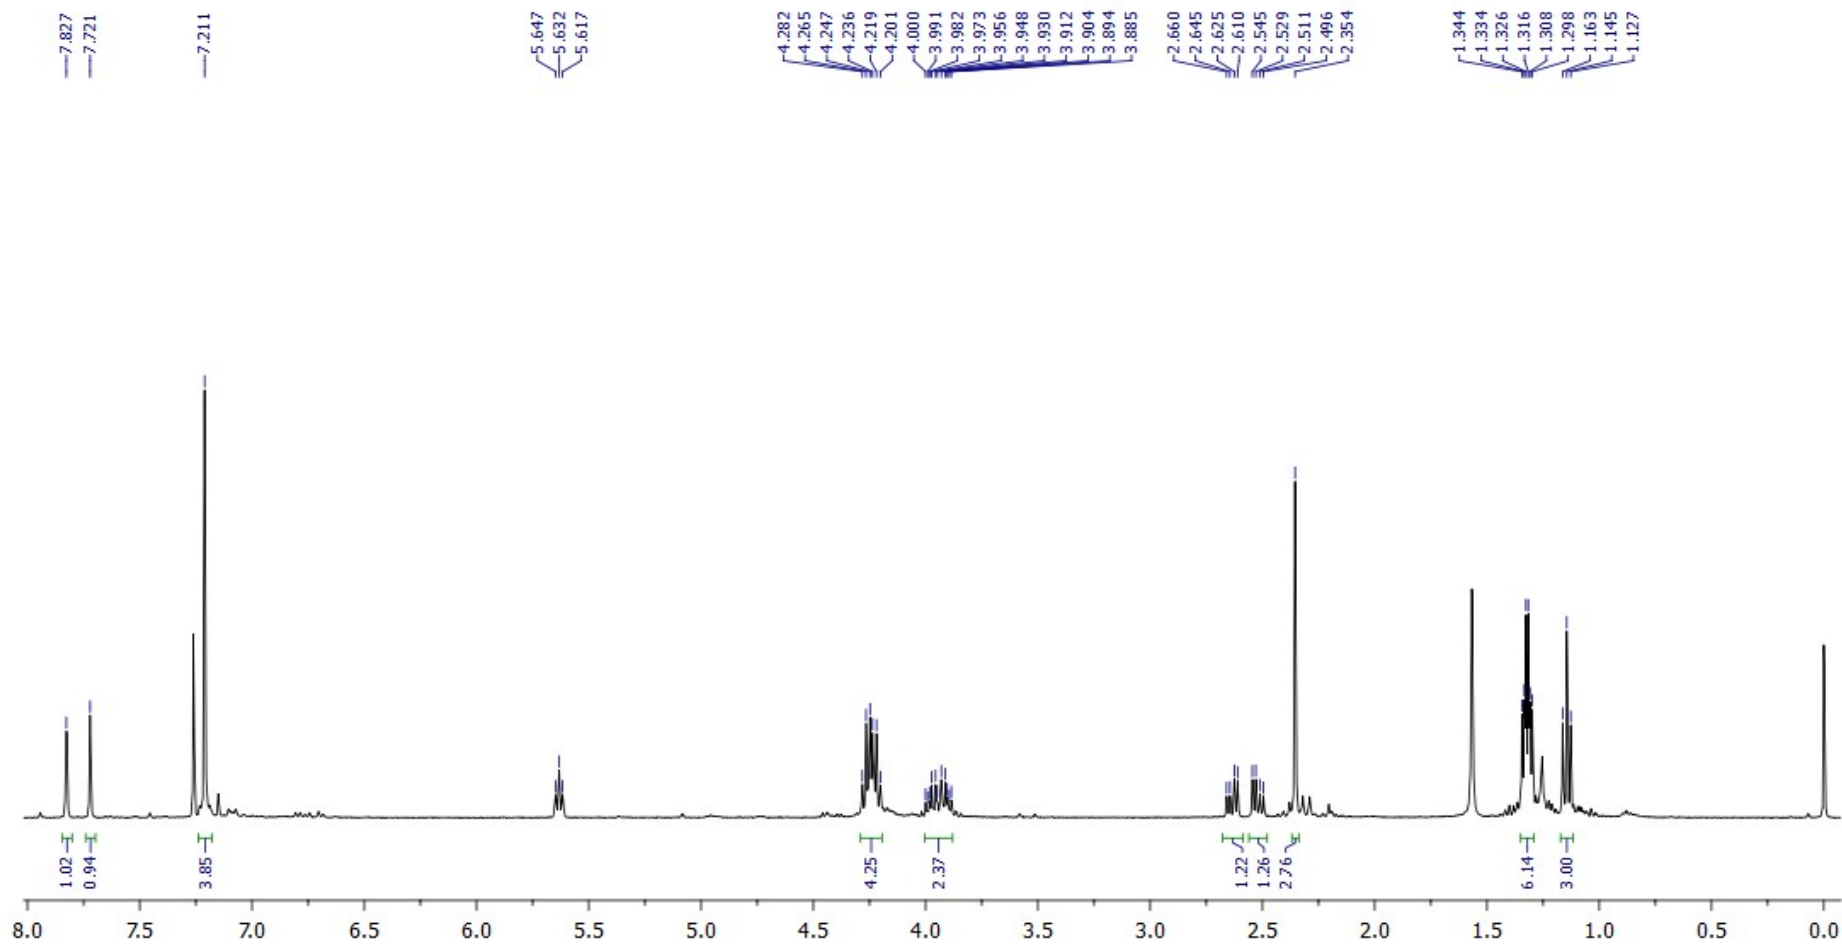

<sup>1</sup>H NMR (400.1 MHz, CDCl<sub>3</sub>)

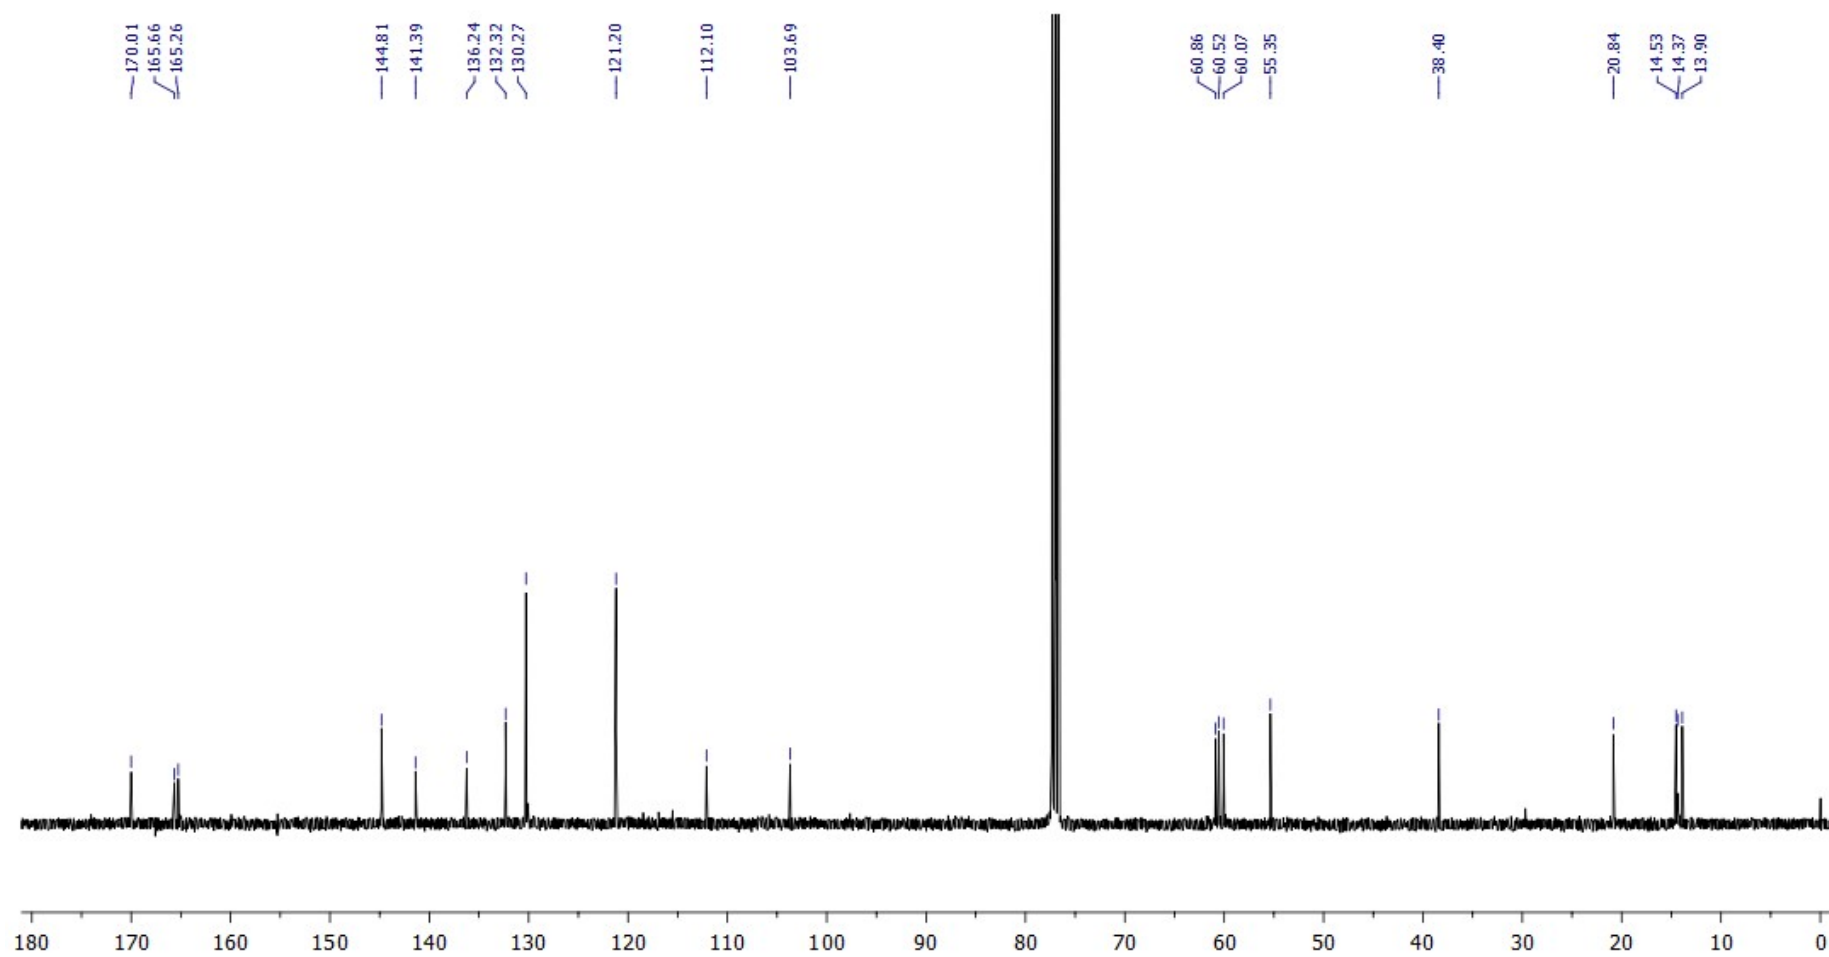

$^{13}\text{C}\{^1\text{H}\}$  NMR (100.6 MHz,  $\text{CDCl}_3$ )

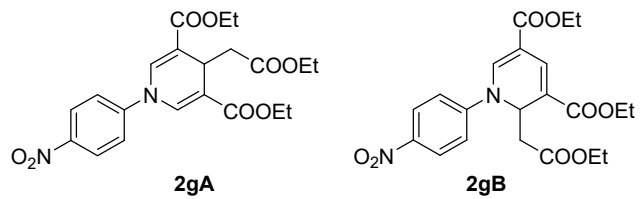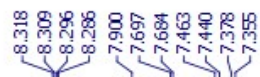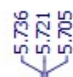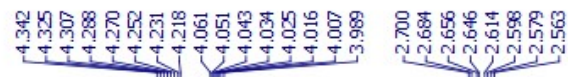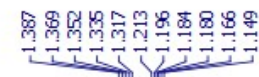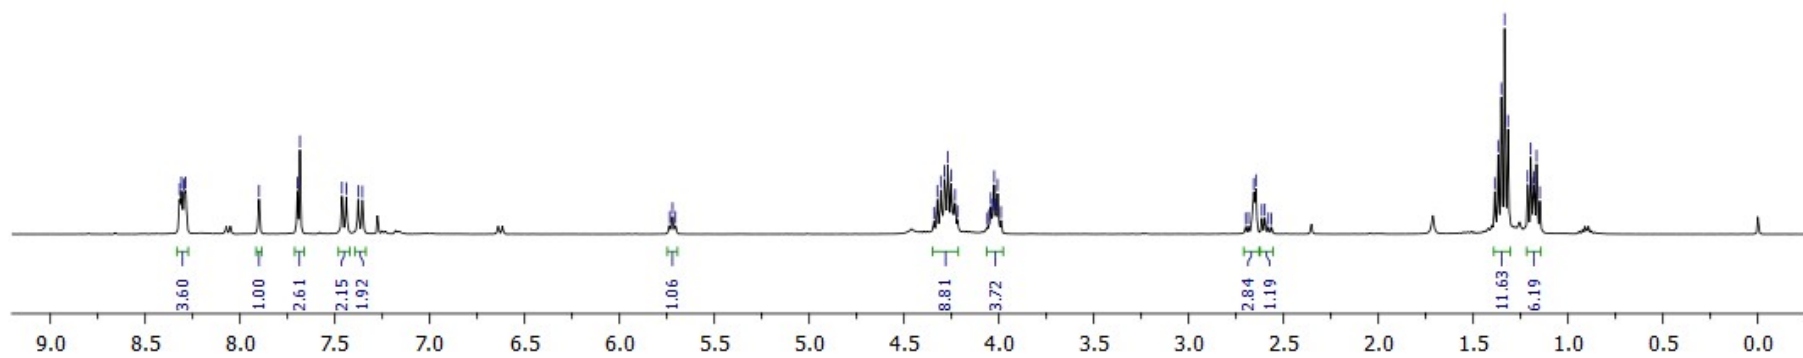

<sup>1</sup>H NMR (400.1 MHz, CDCl<sub>3</sub>)

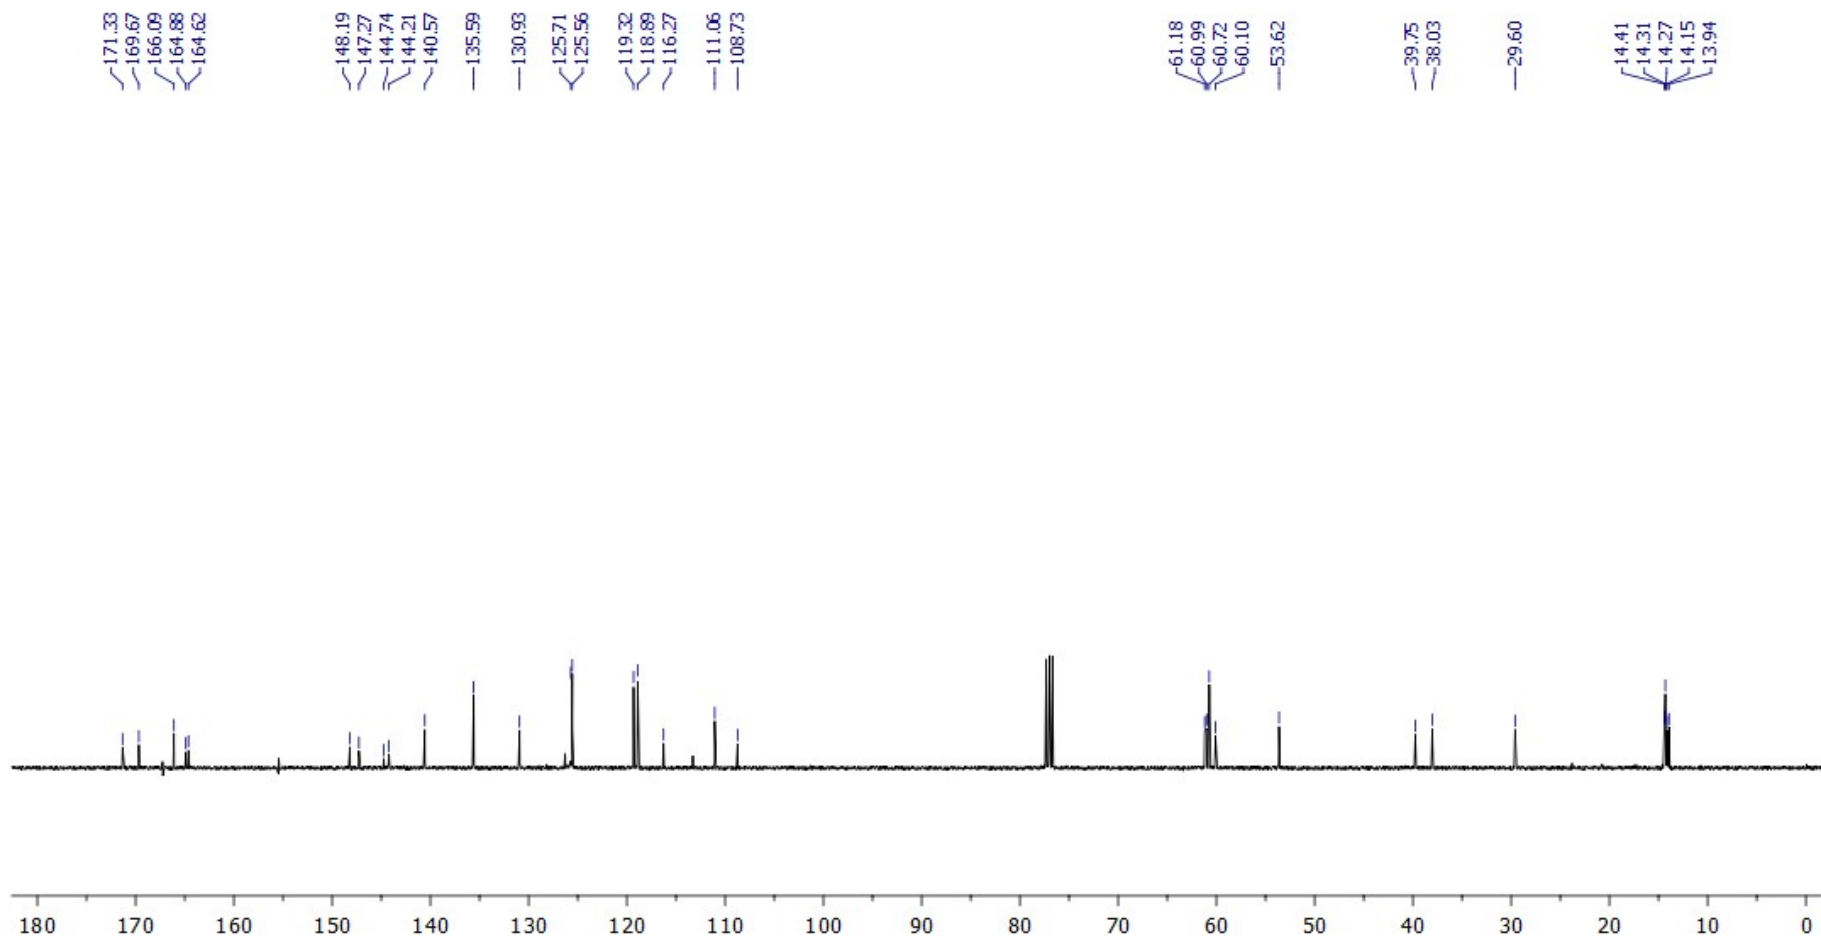

$^{13}\text{C}\{^1\text{H}\}$  NMR (100.6 MHz,  $\text{CDCl}_3$ )

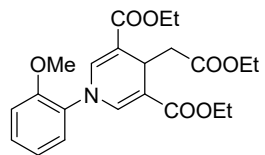

2hA

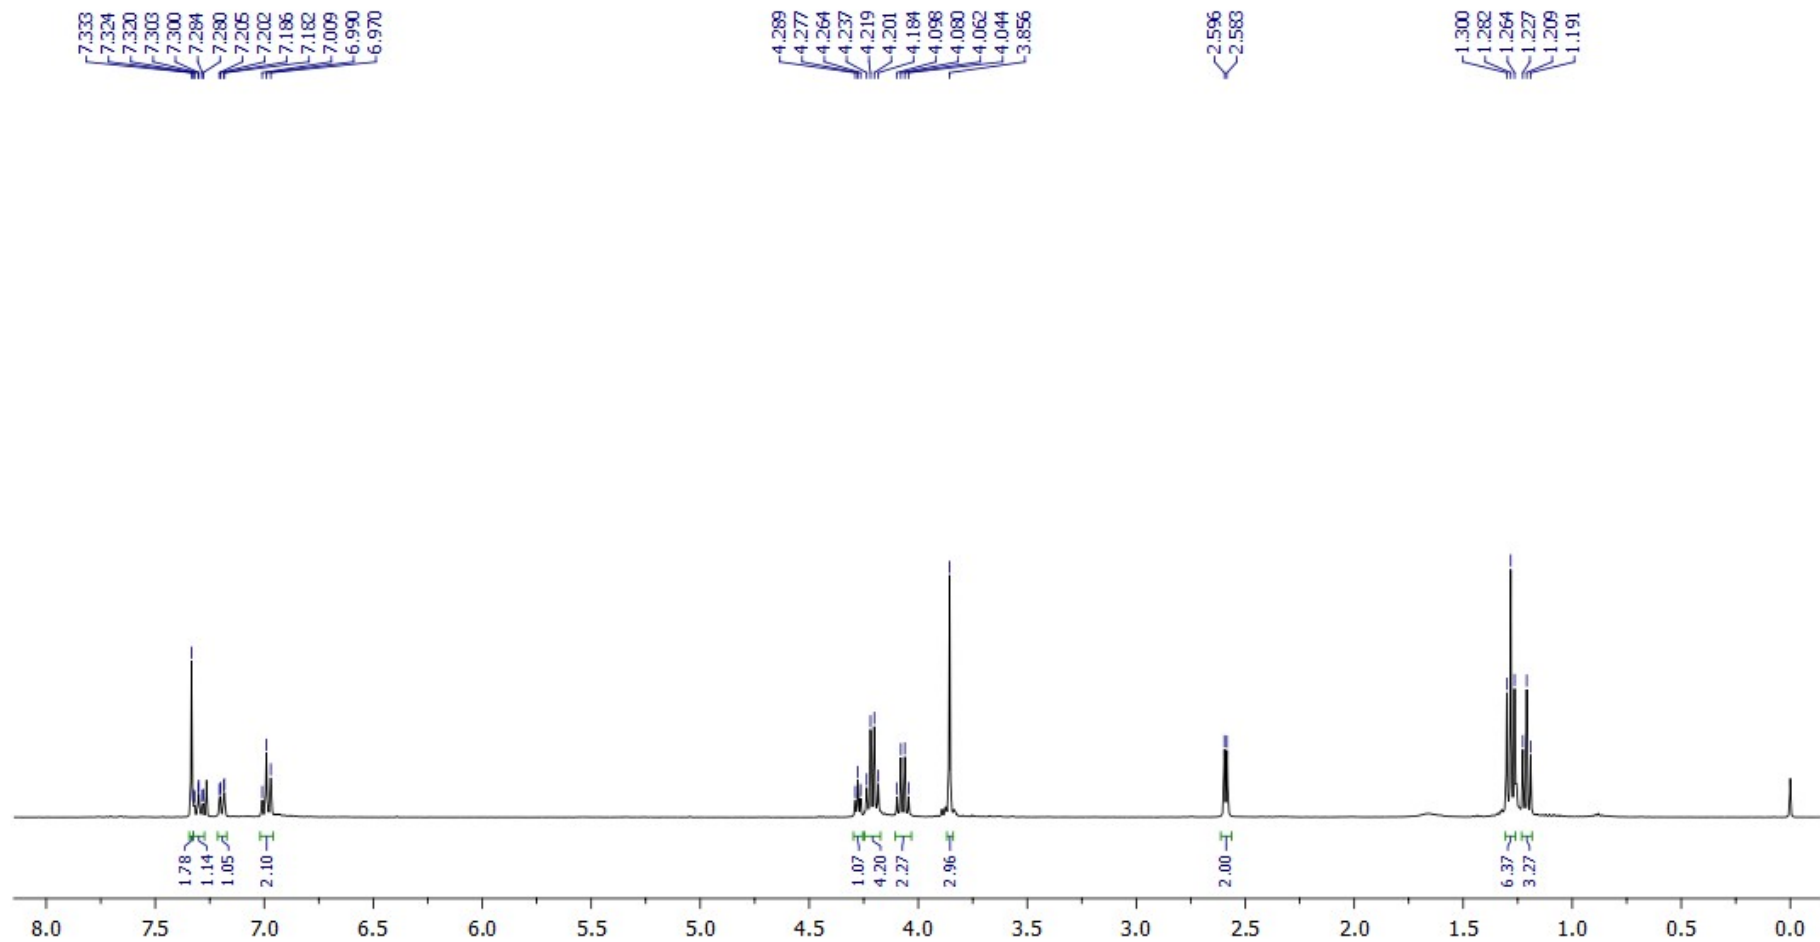

<sup>1</sup>H NMR (400.1 MHz, CDCl<sub>3</sub>)

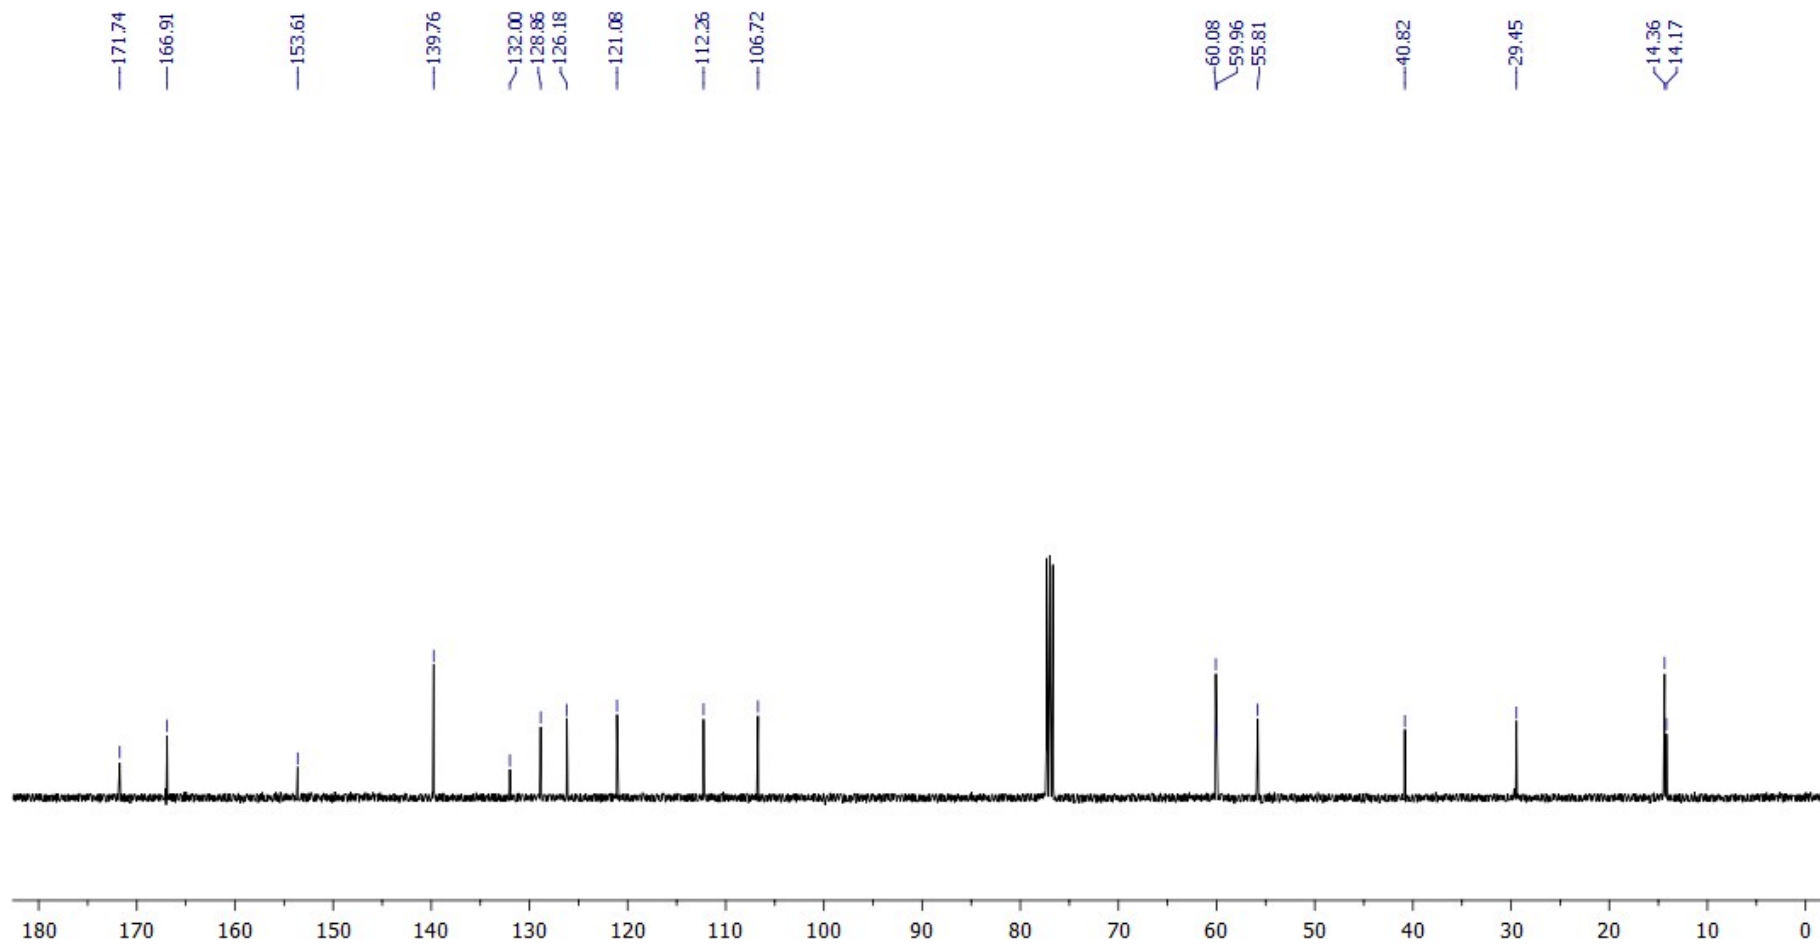

$^{13}\text{C}\{^1\text{H}\}$  NMR (100.6 MHz,  $\text{CDCl}_3$ )

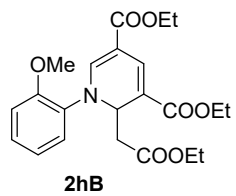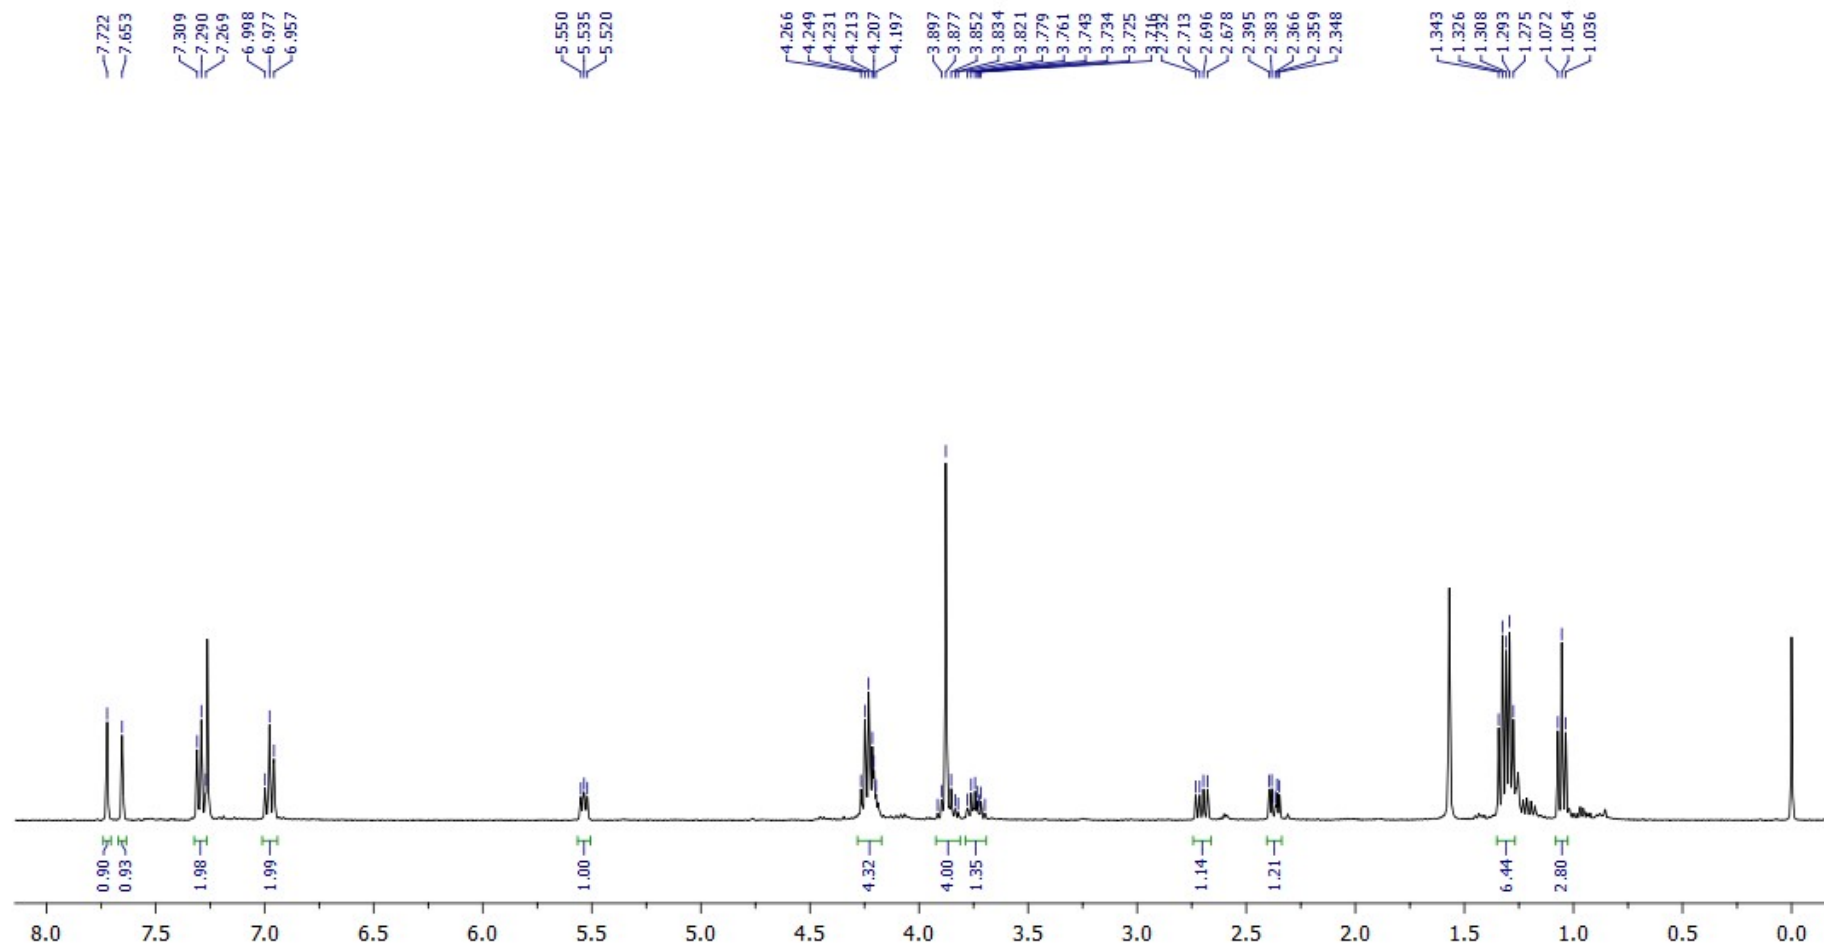

<sup>1</sup>H NMR (400.1 MHz, CDCl<sub>3</sub>)



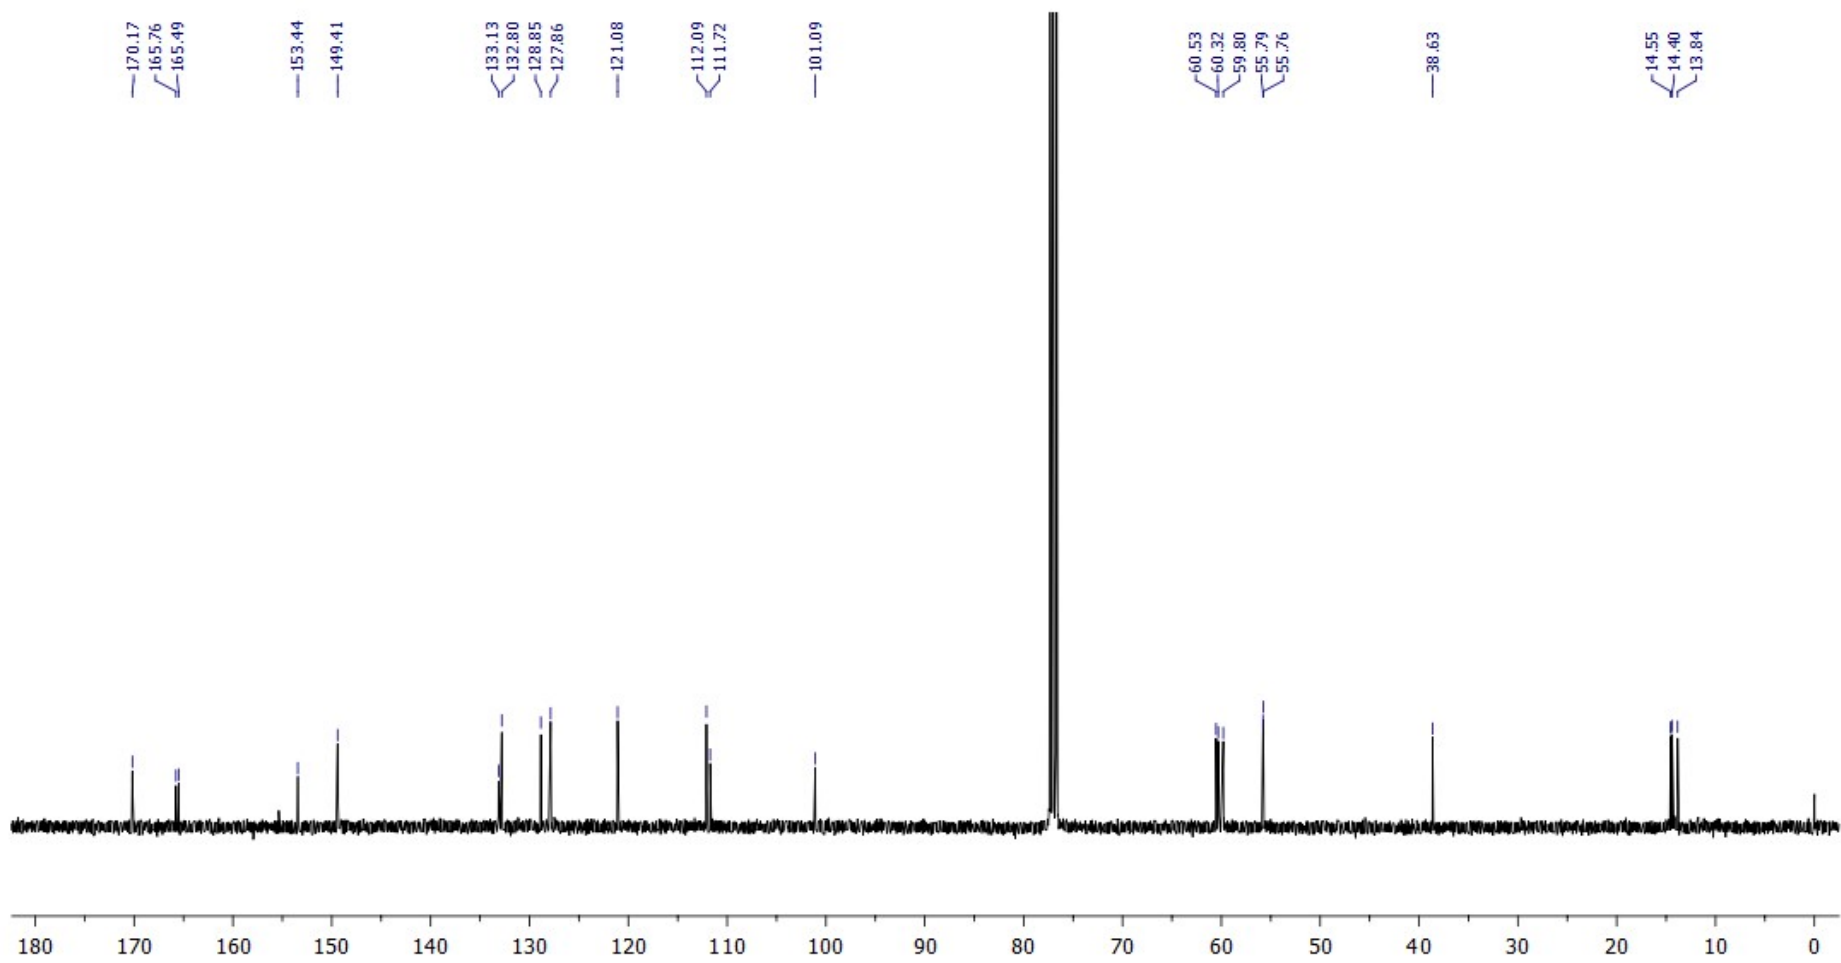

$^{13}\text{C}\{^1\text{H}\}$  NMR (100.6 MHz,  $\text{CDCl}_3$ )

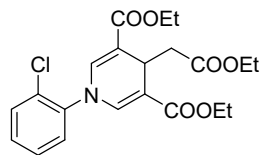

2iA

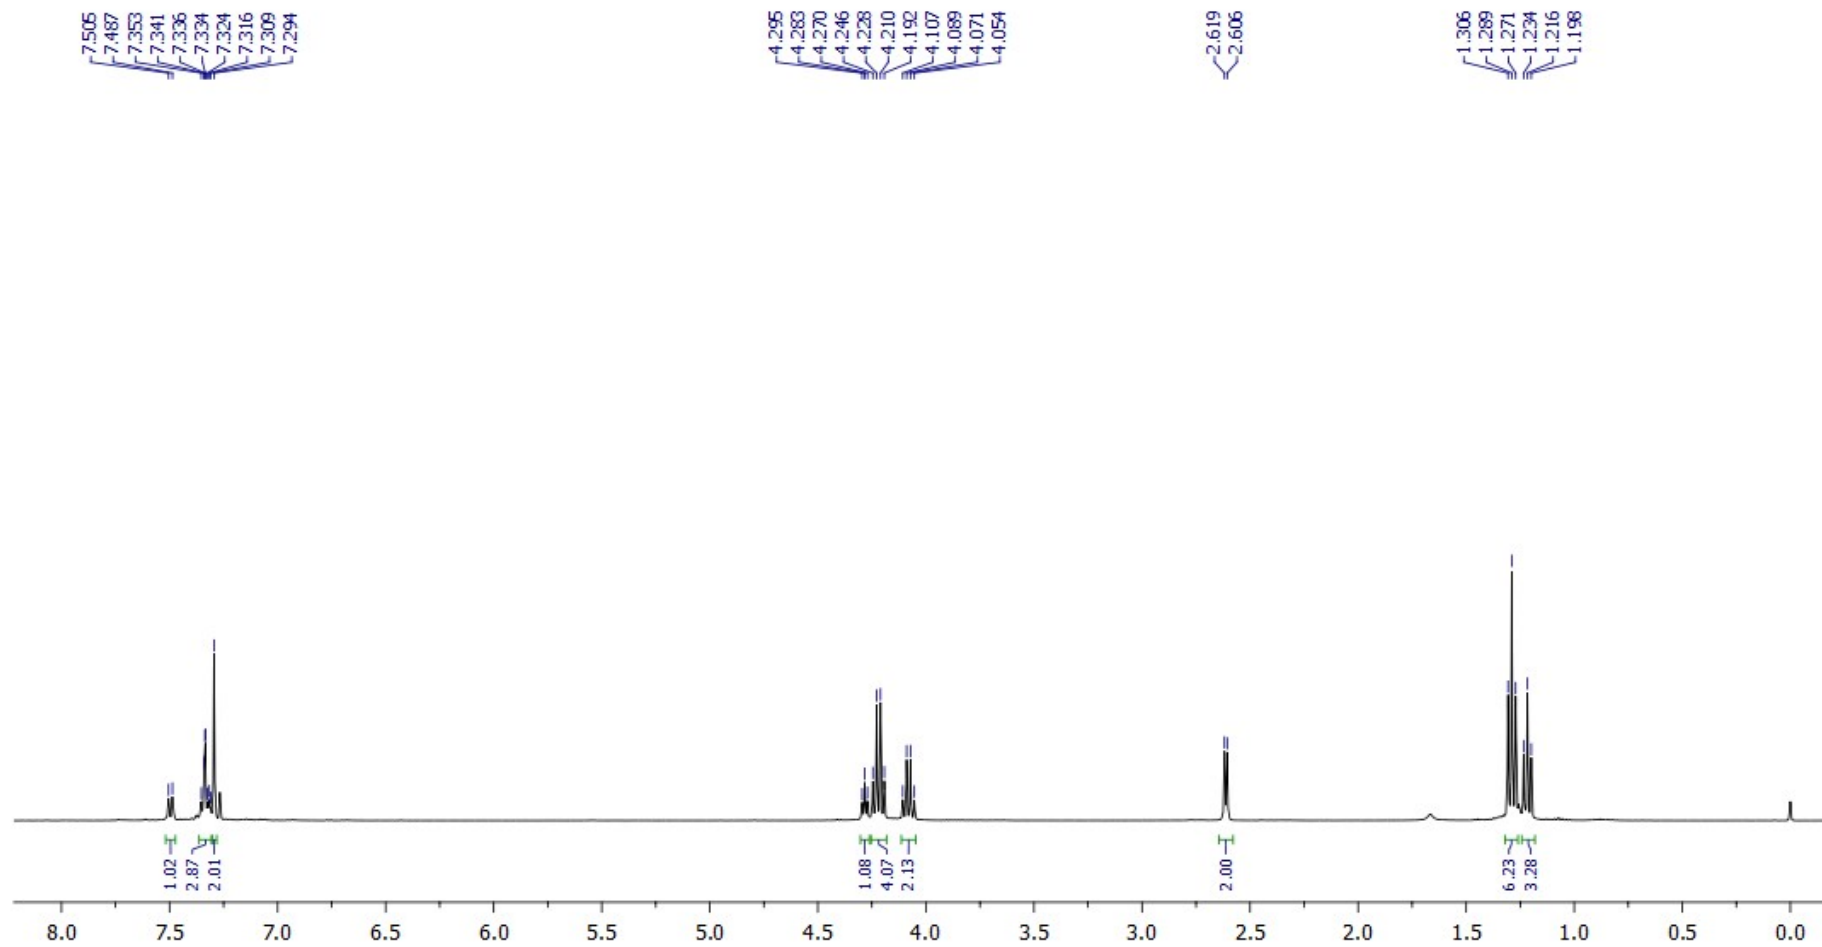

<sup>1</sup>H NMR (400.1 MHz, CDCl<sub>3</sub>)

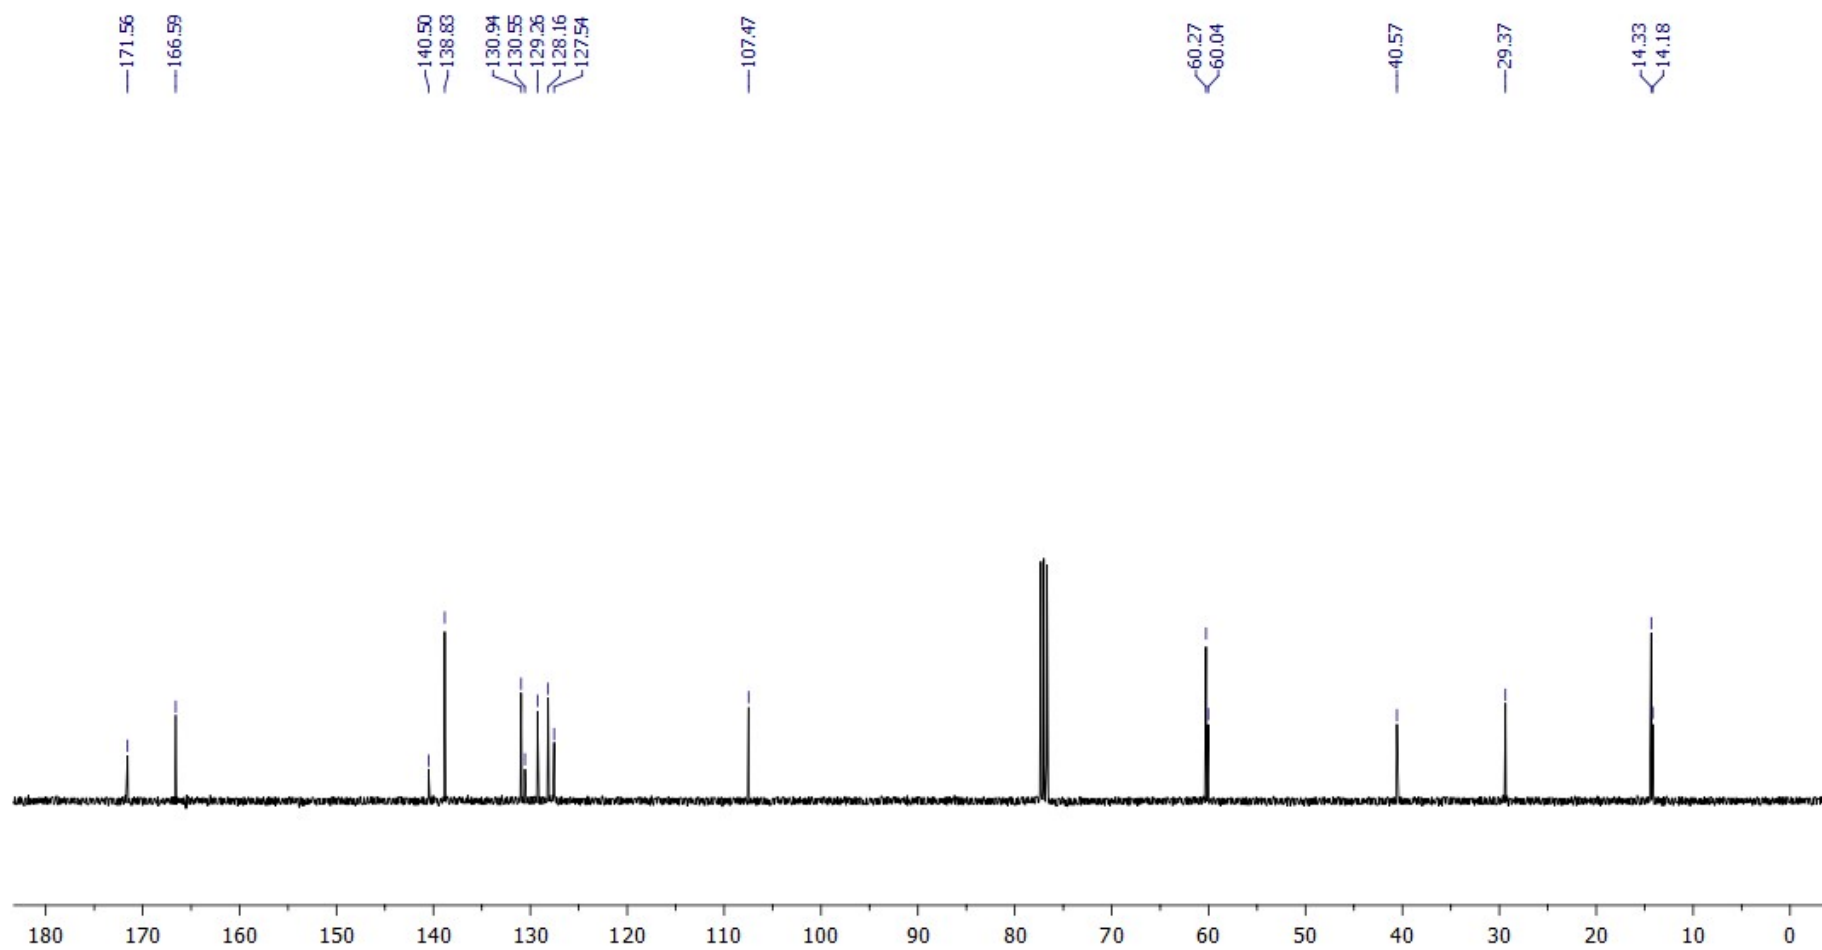

$^{13}\text{C}\{^1\text{H}\}$  NMR (100.6 MHz,  $\text{CDCl}_3$ )

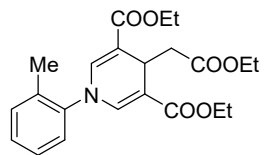

2jA

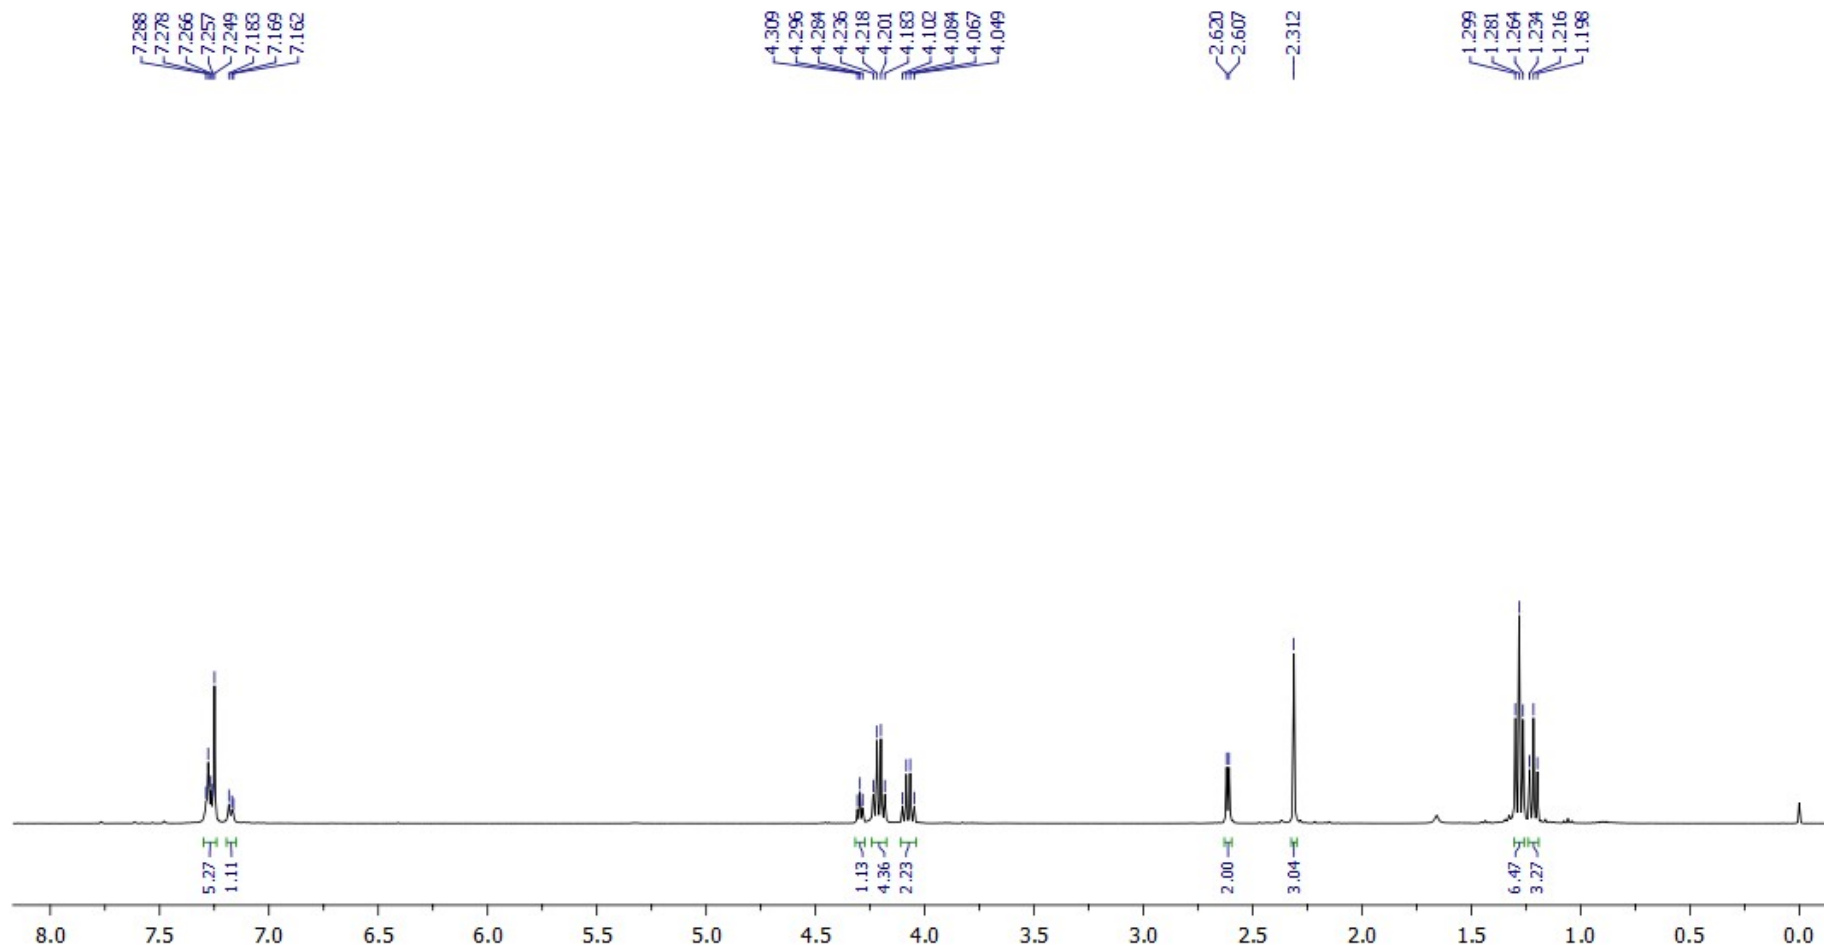

<sup>1</sup>H NMR (400.1 MHz, CDCl<sub>3</sub>)

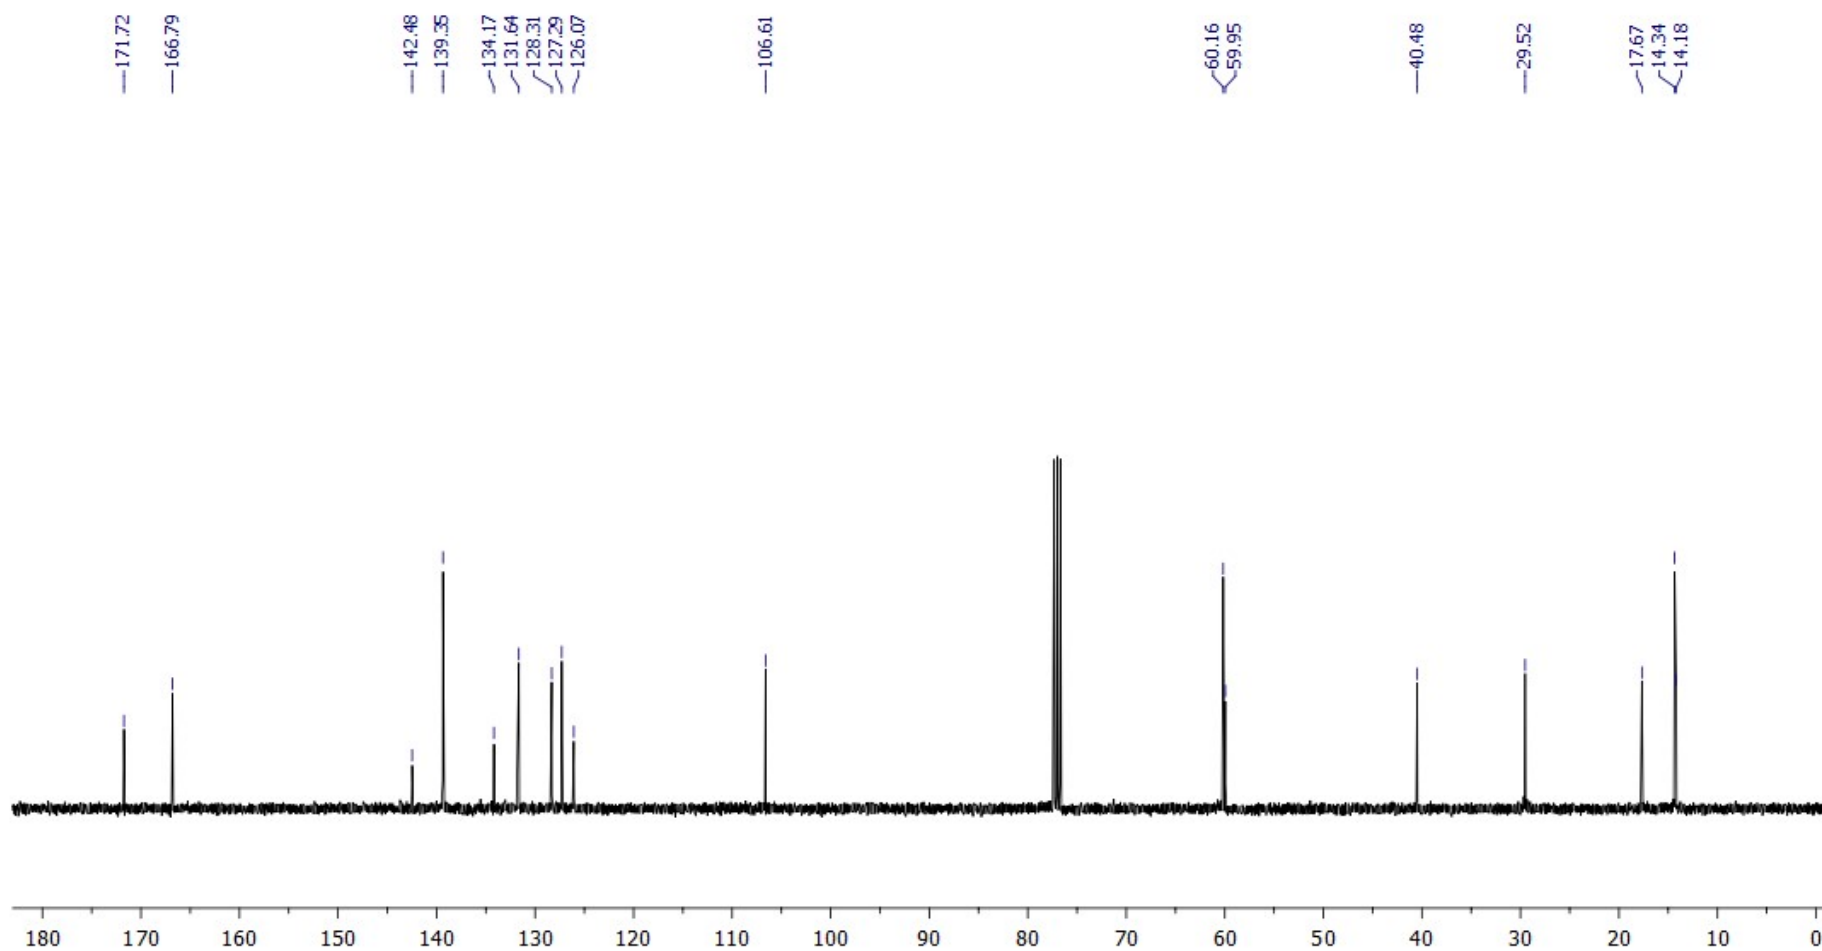

$^{13}\text{C}\{^1\text{H}\}$  NMR (100.6 MHz,  $\text{CDCl}_3$ )

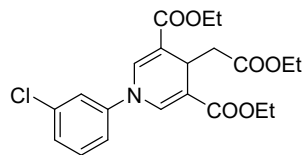

2kA

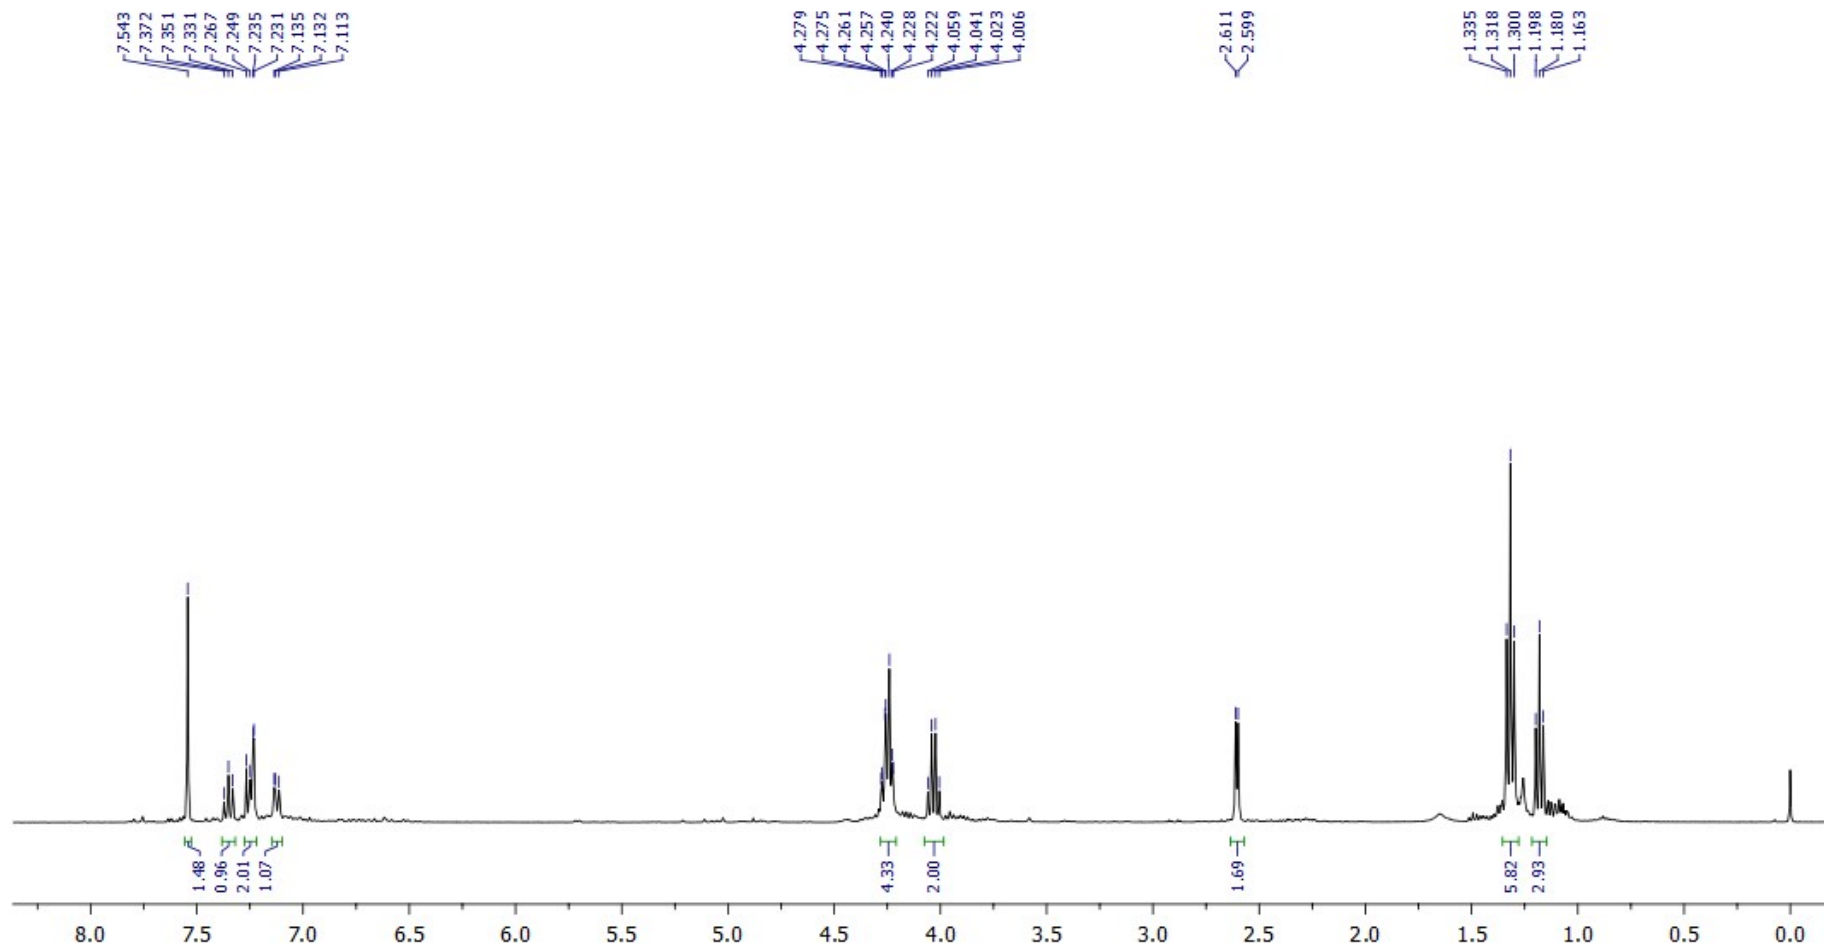

<sup>1</sup>H NMR (400.1 MHz, CDCl<sub>3</sub>)

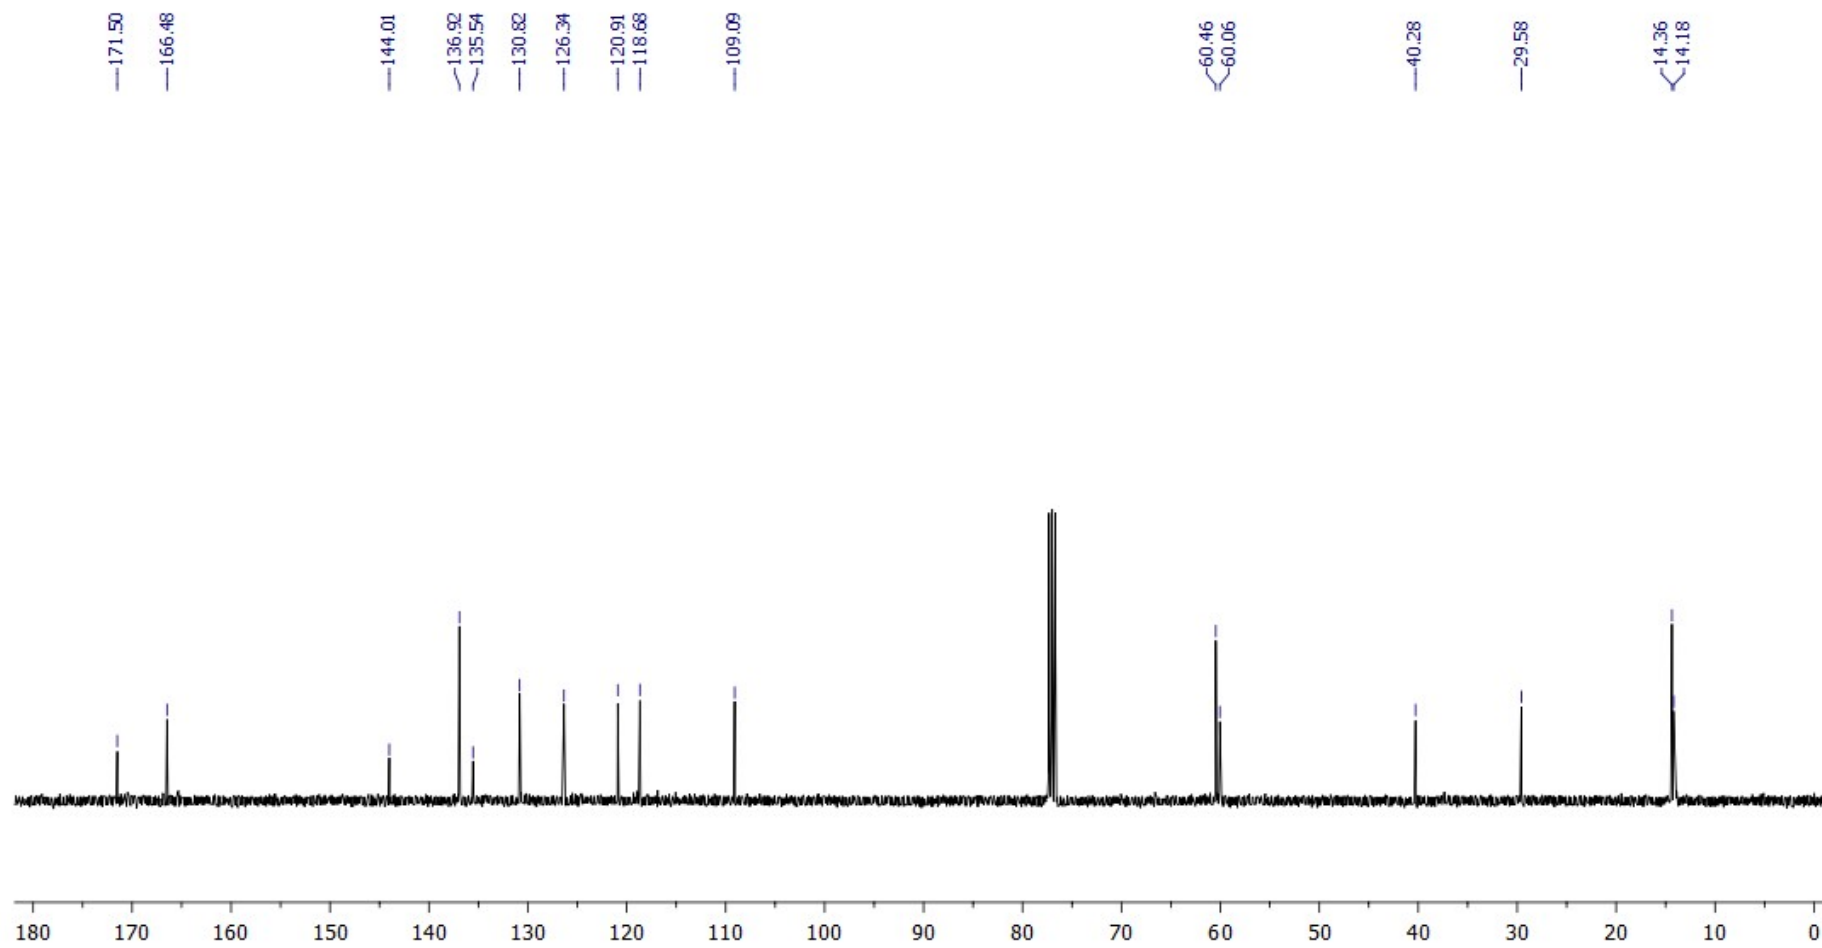

$^{13}\text{C}\{^1\text{H}\}$  NMR (100.6 MHz,  $\text{CDCl}_3$ )

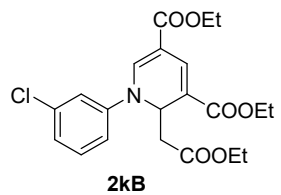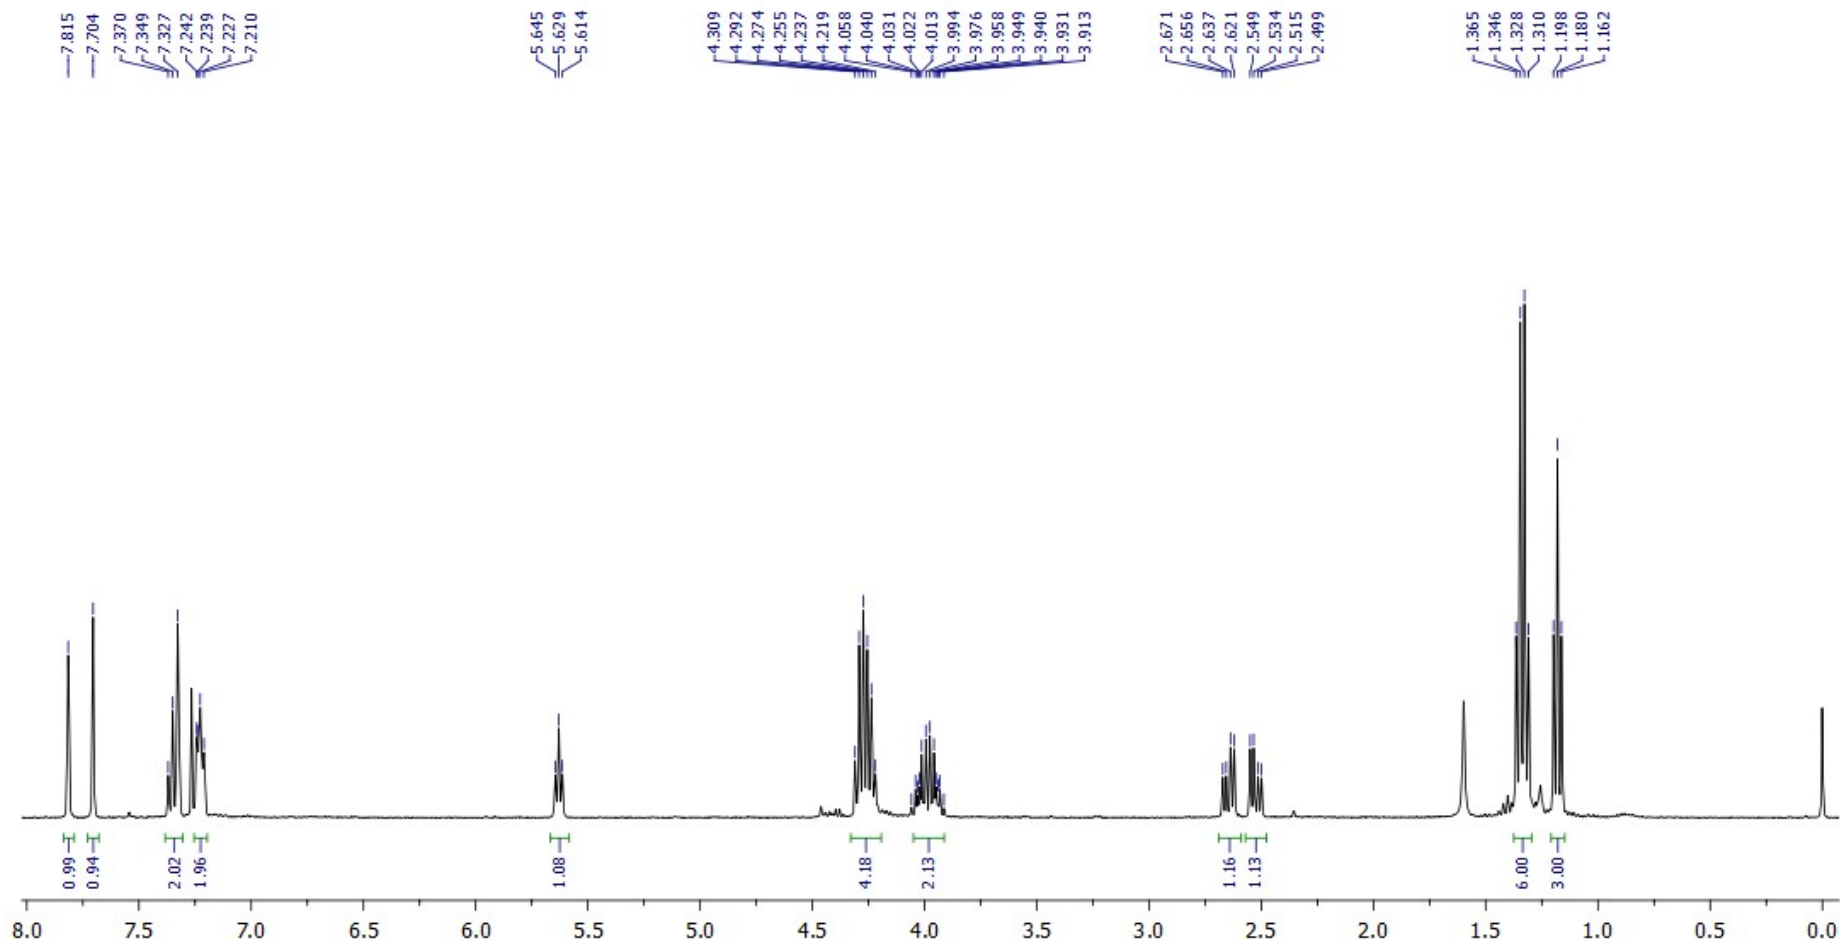

<sup>1</sup>H NMR (400.1 MHz, CDCl<sub>3</sub>)



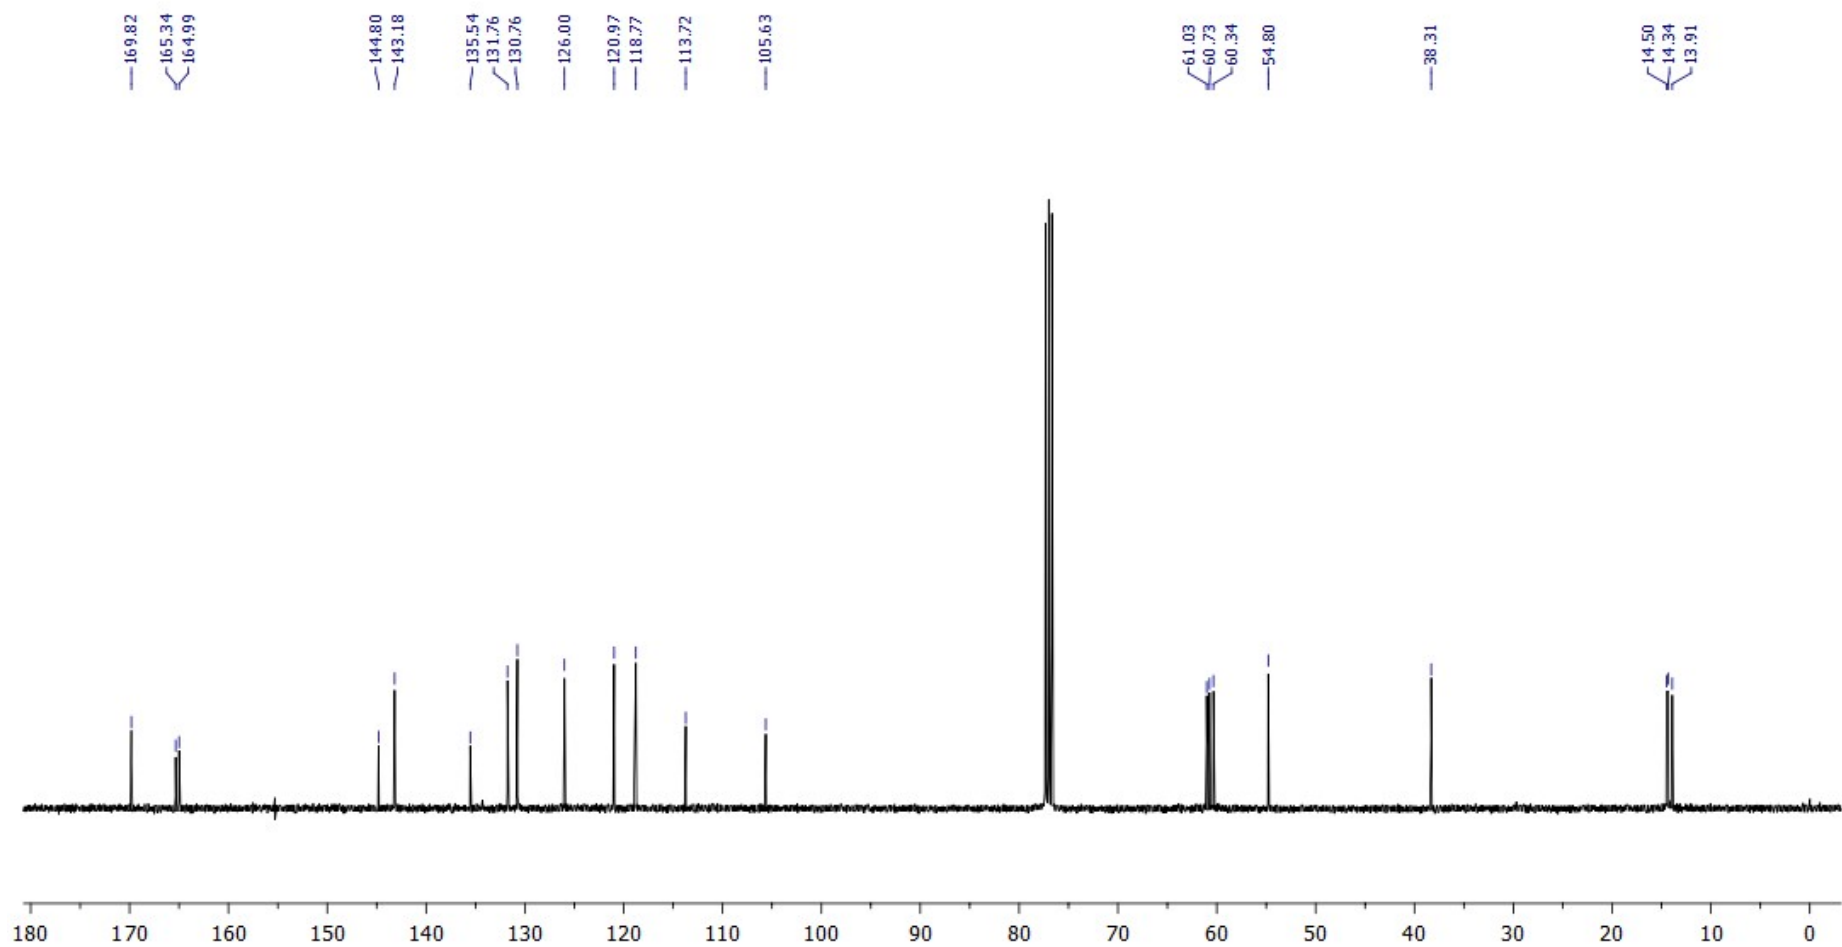

$^{13}\text{C}\{^1\text{H}\}$  NMR (100.6 MHz,  $\text{CDCl}_3$ )

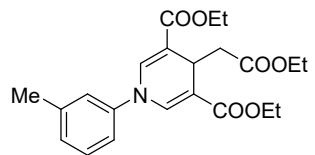

2IA

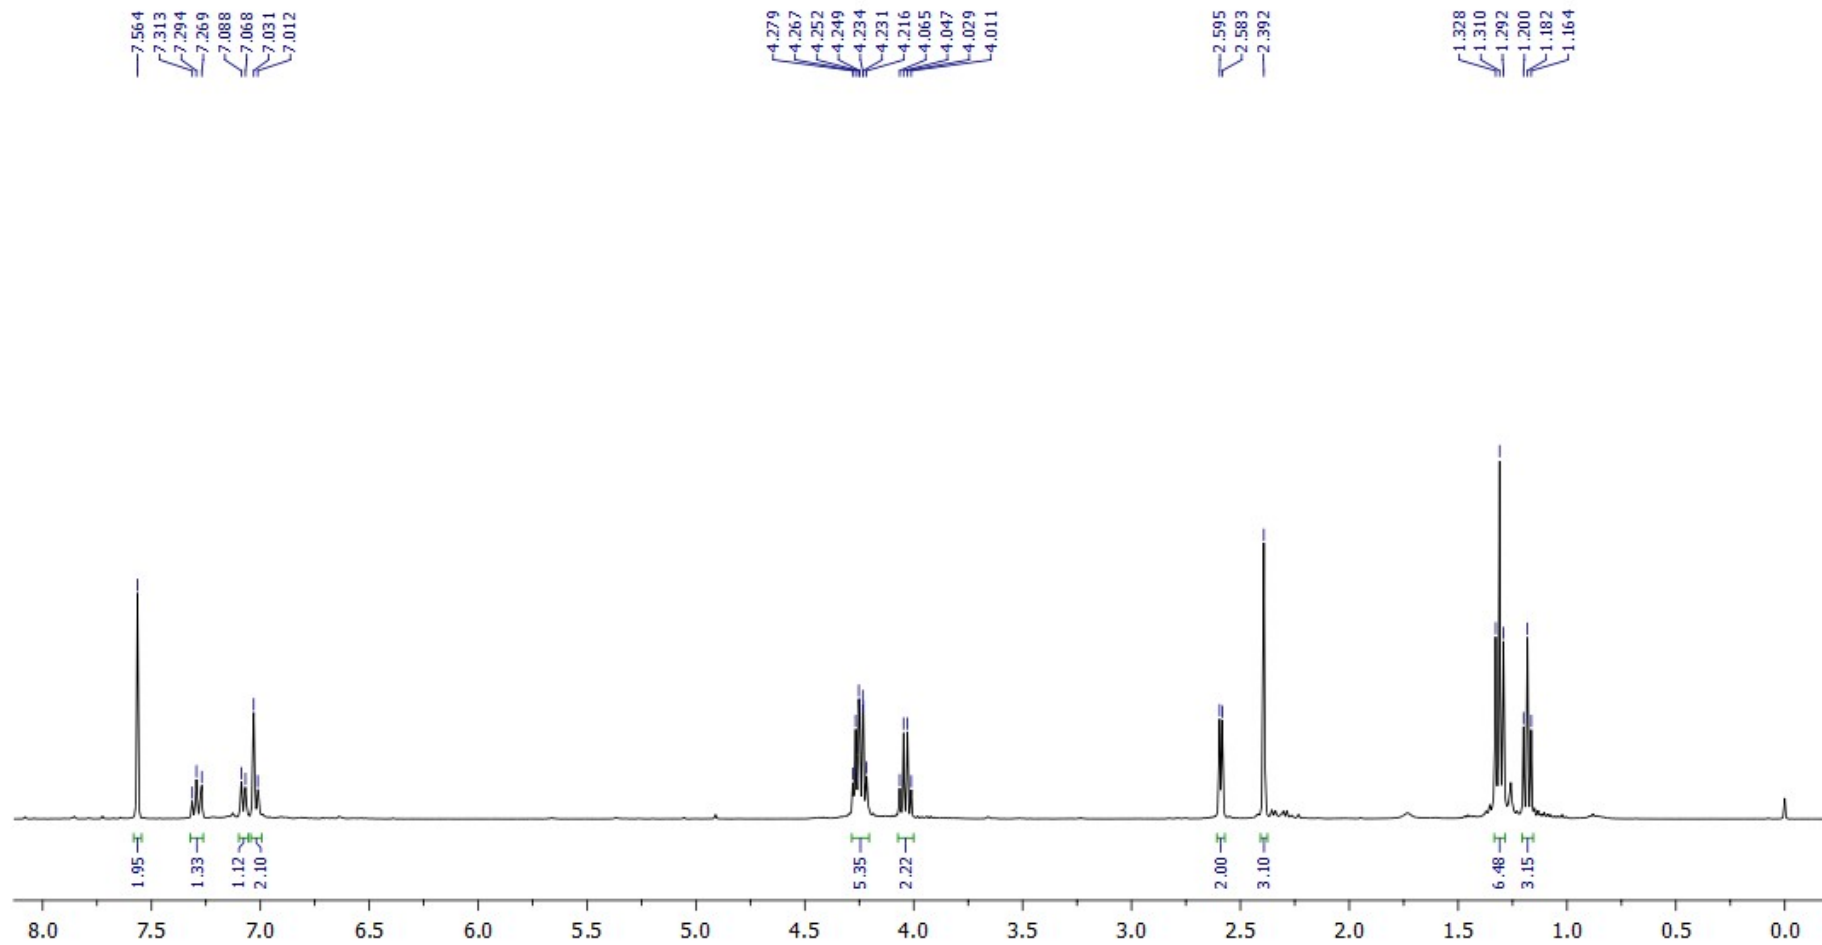

<sup>1</sup>H NMR (400.1 MHz, CDCl<sub>3</sub>)

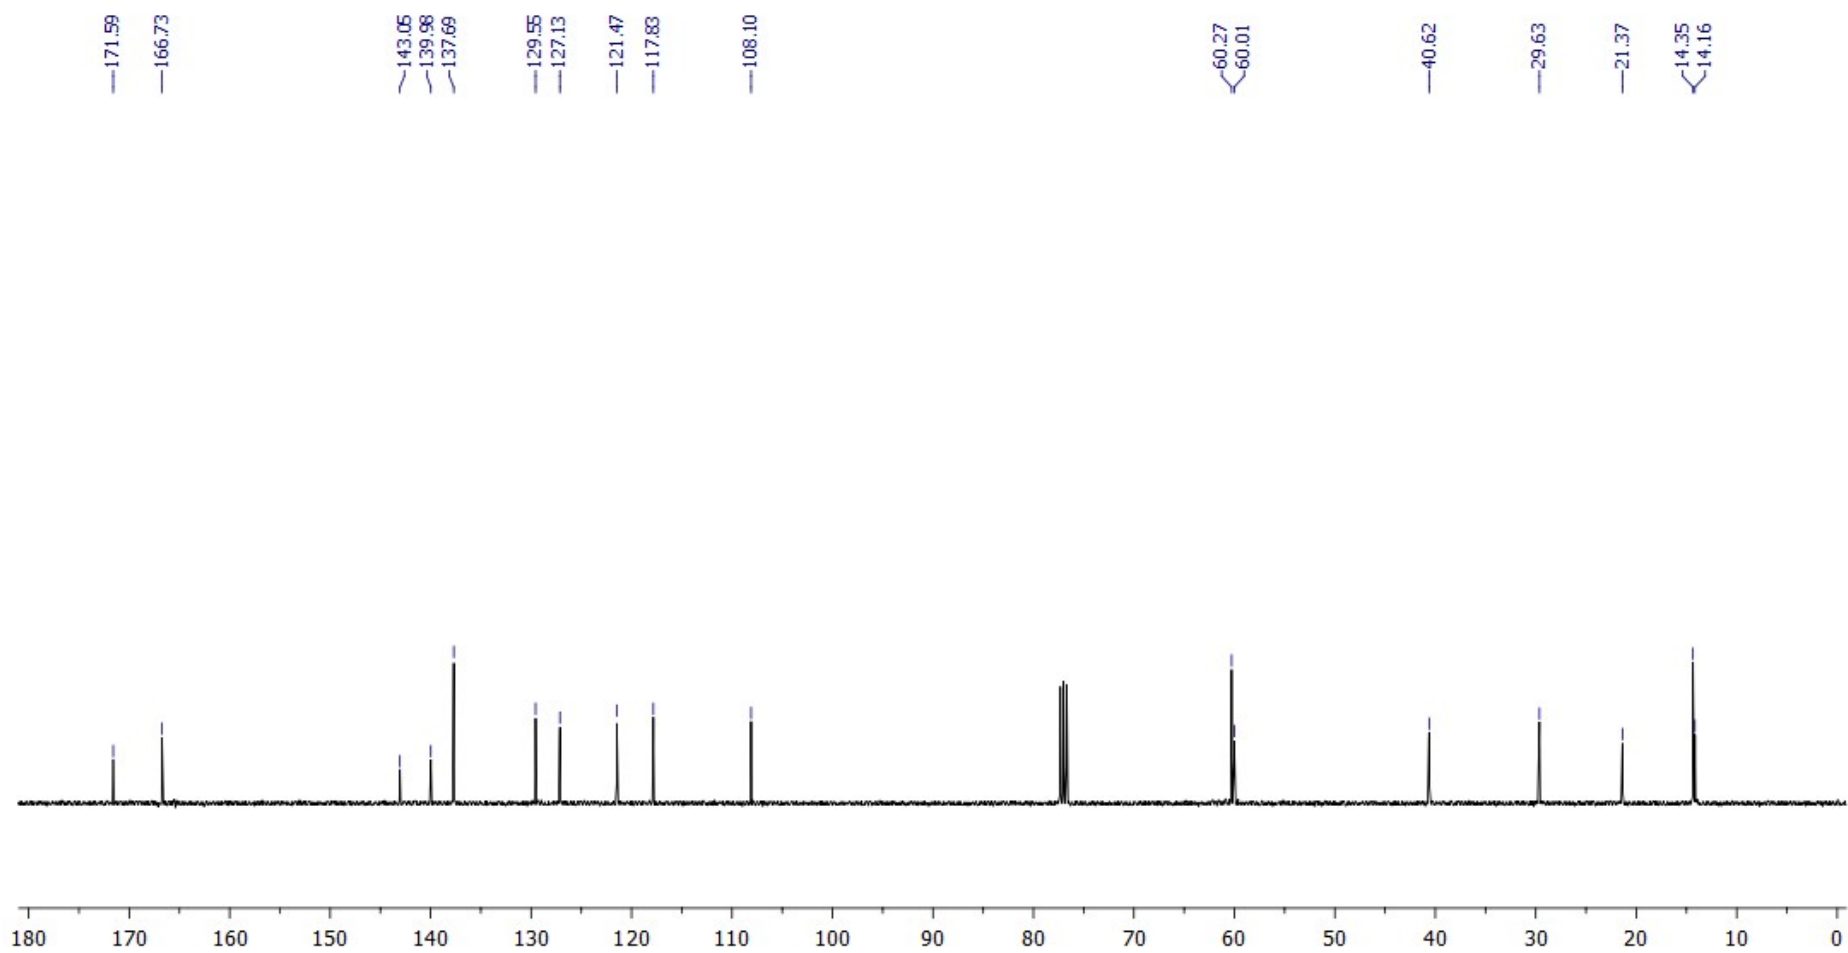

$^{13}\text{C}\{^1\text{H}\}$  NMR (100.6 MHz,  $\text{CDCl}_3$ )

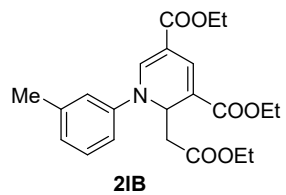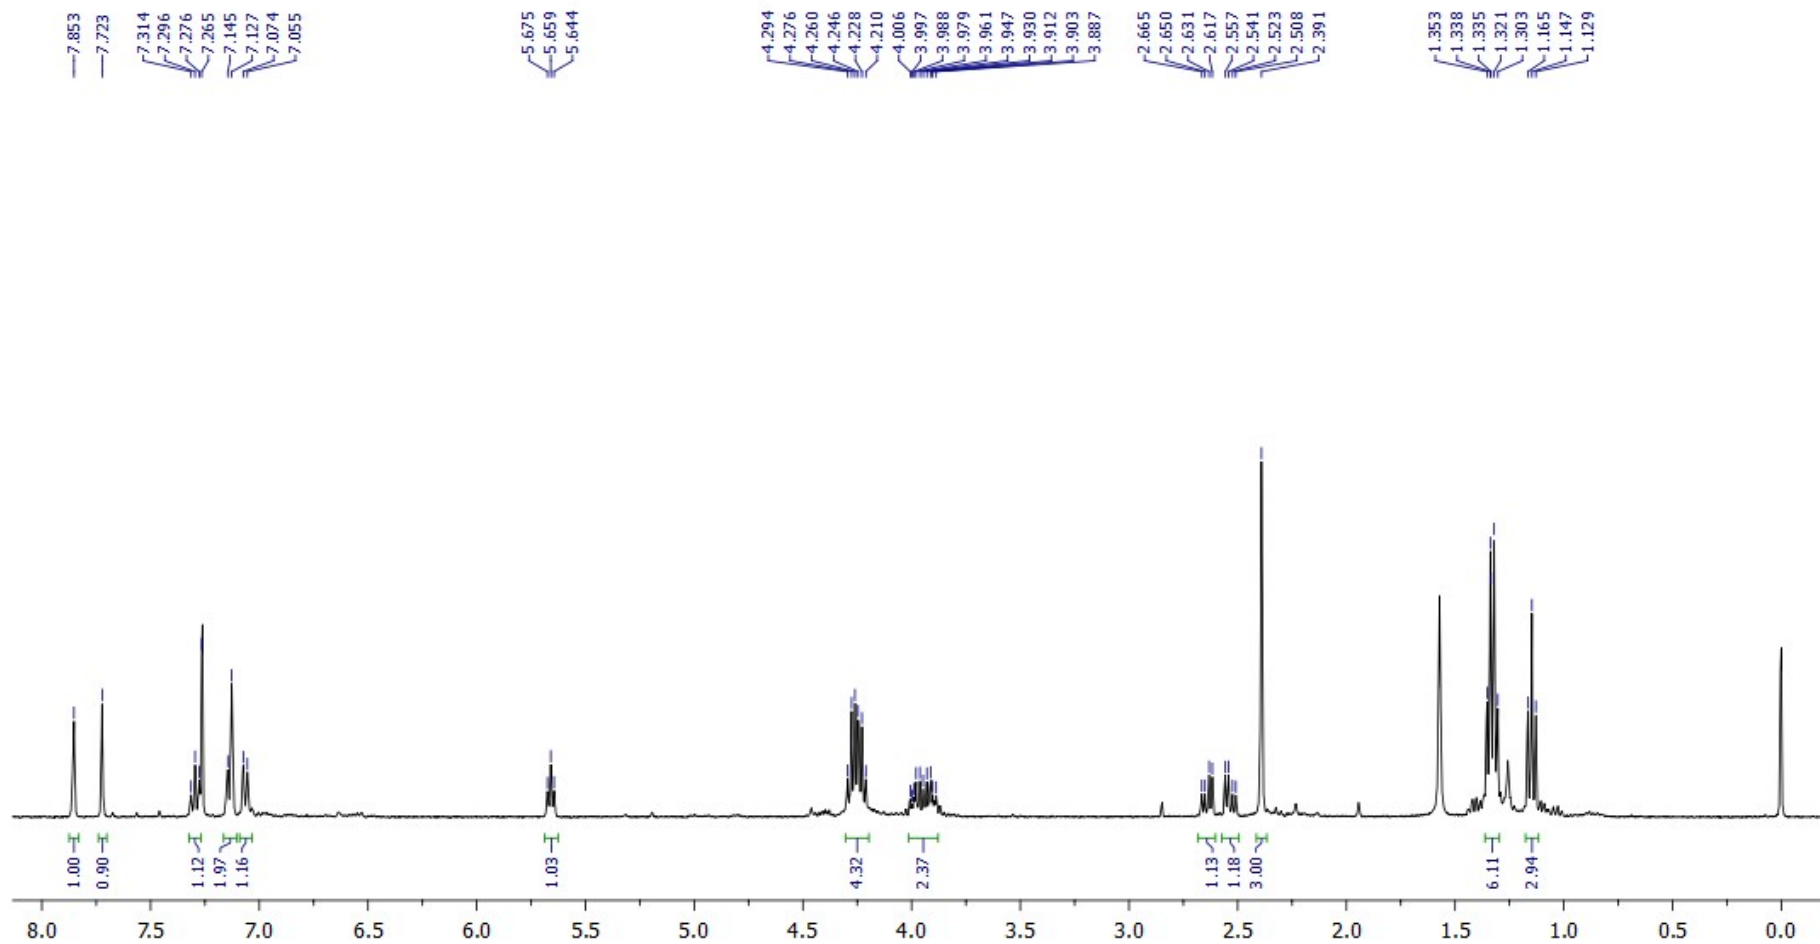

<sup>1</sup>H NMR (400.1 MHz, CDCl<sub>3</sub>)

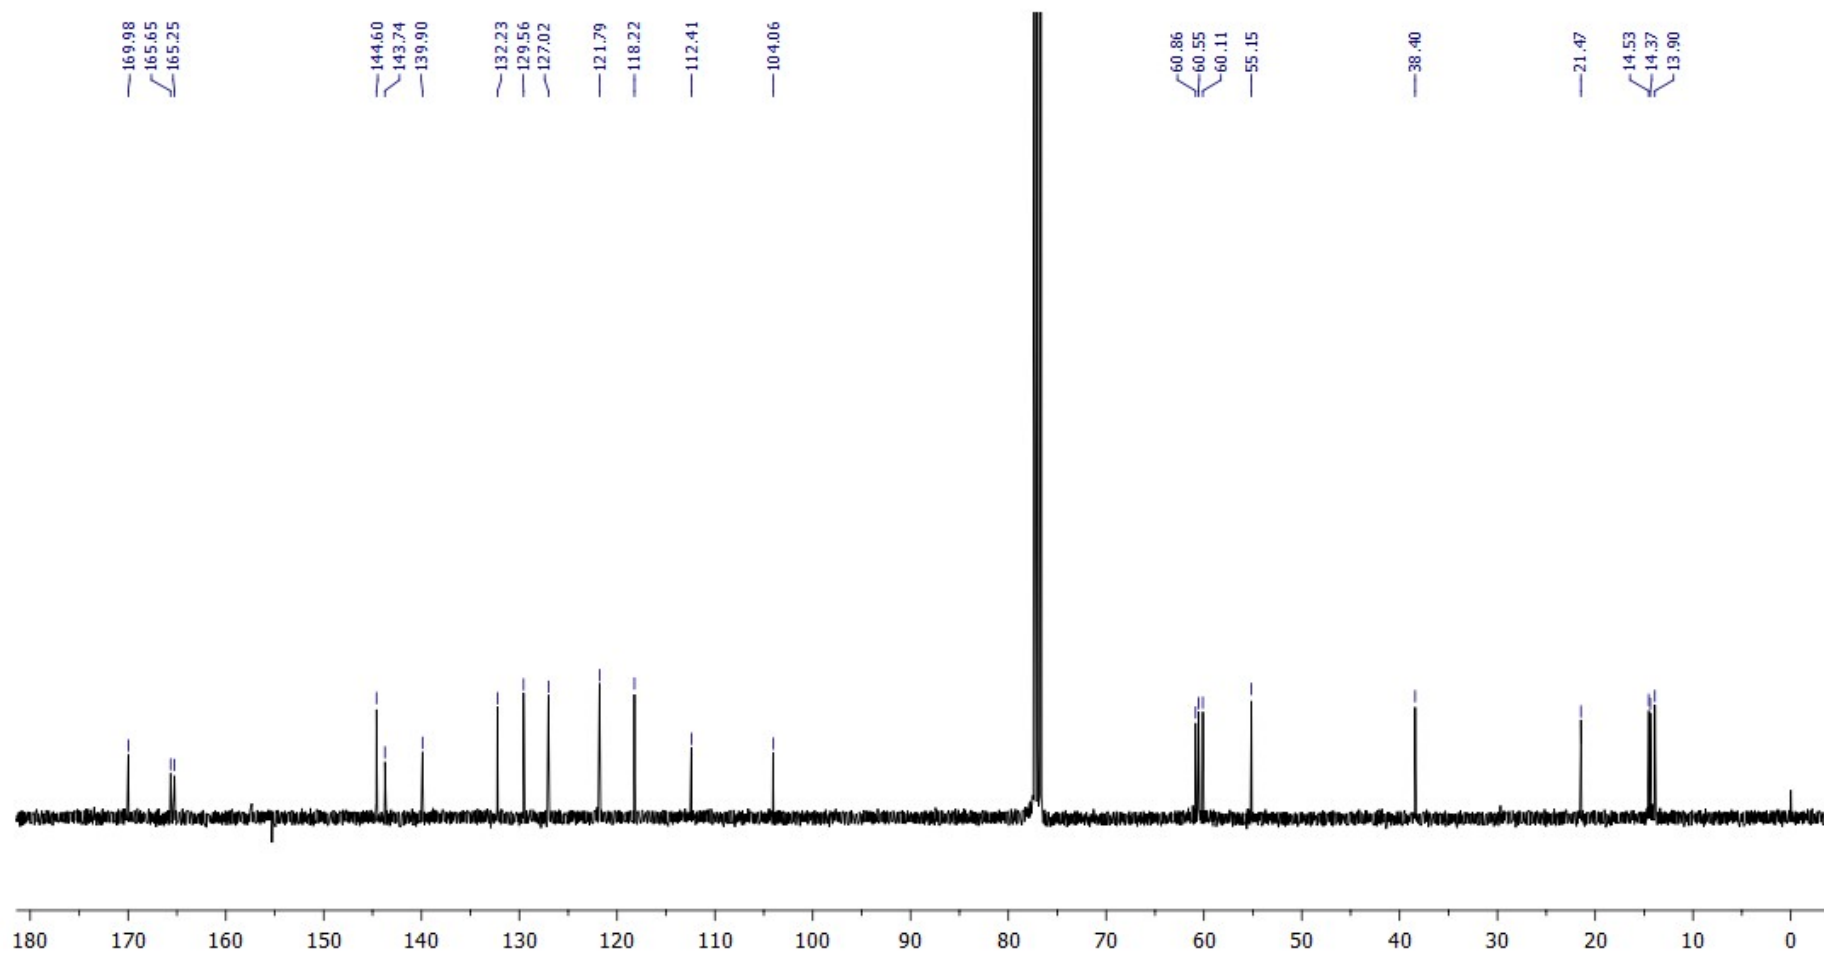

$^{13}\text{C}\{^1\text{H}\}$  NMR (100.6 MHz,  $\text{CDCl}_3$ )

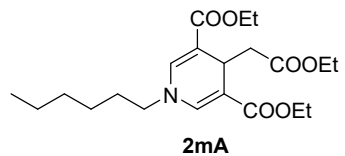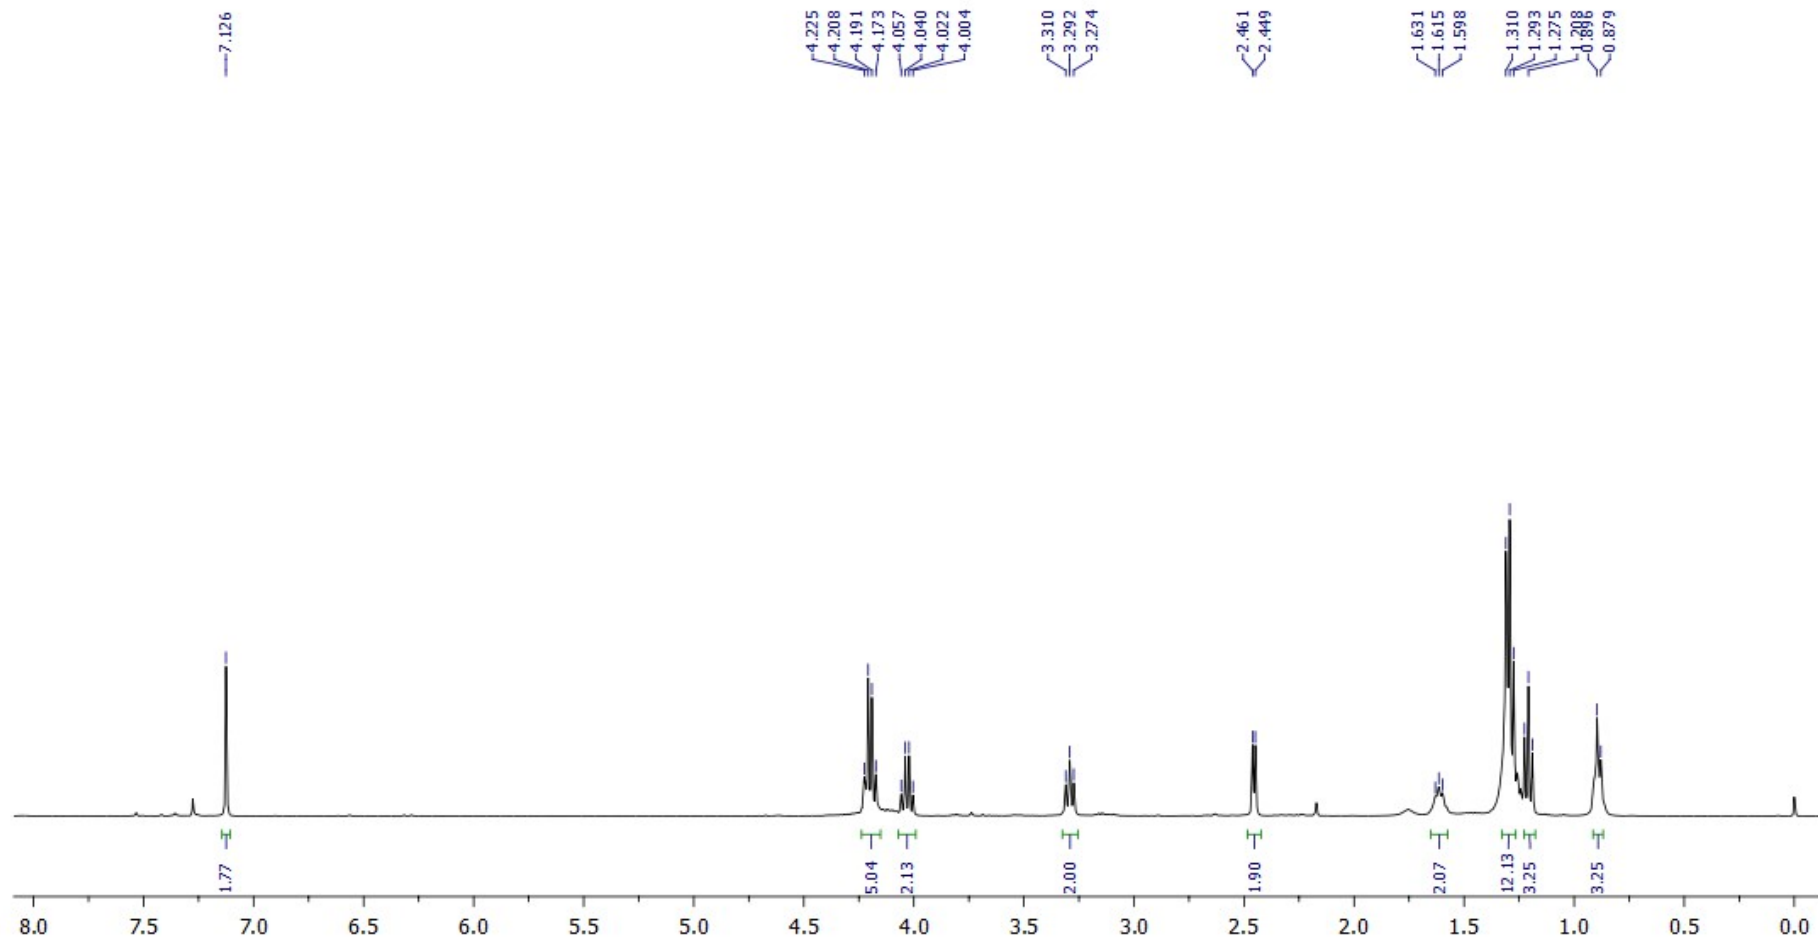

<sup>1</sup>H NMR (400.1 MHz, CDCl<sub>3</sub>)

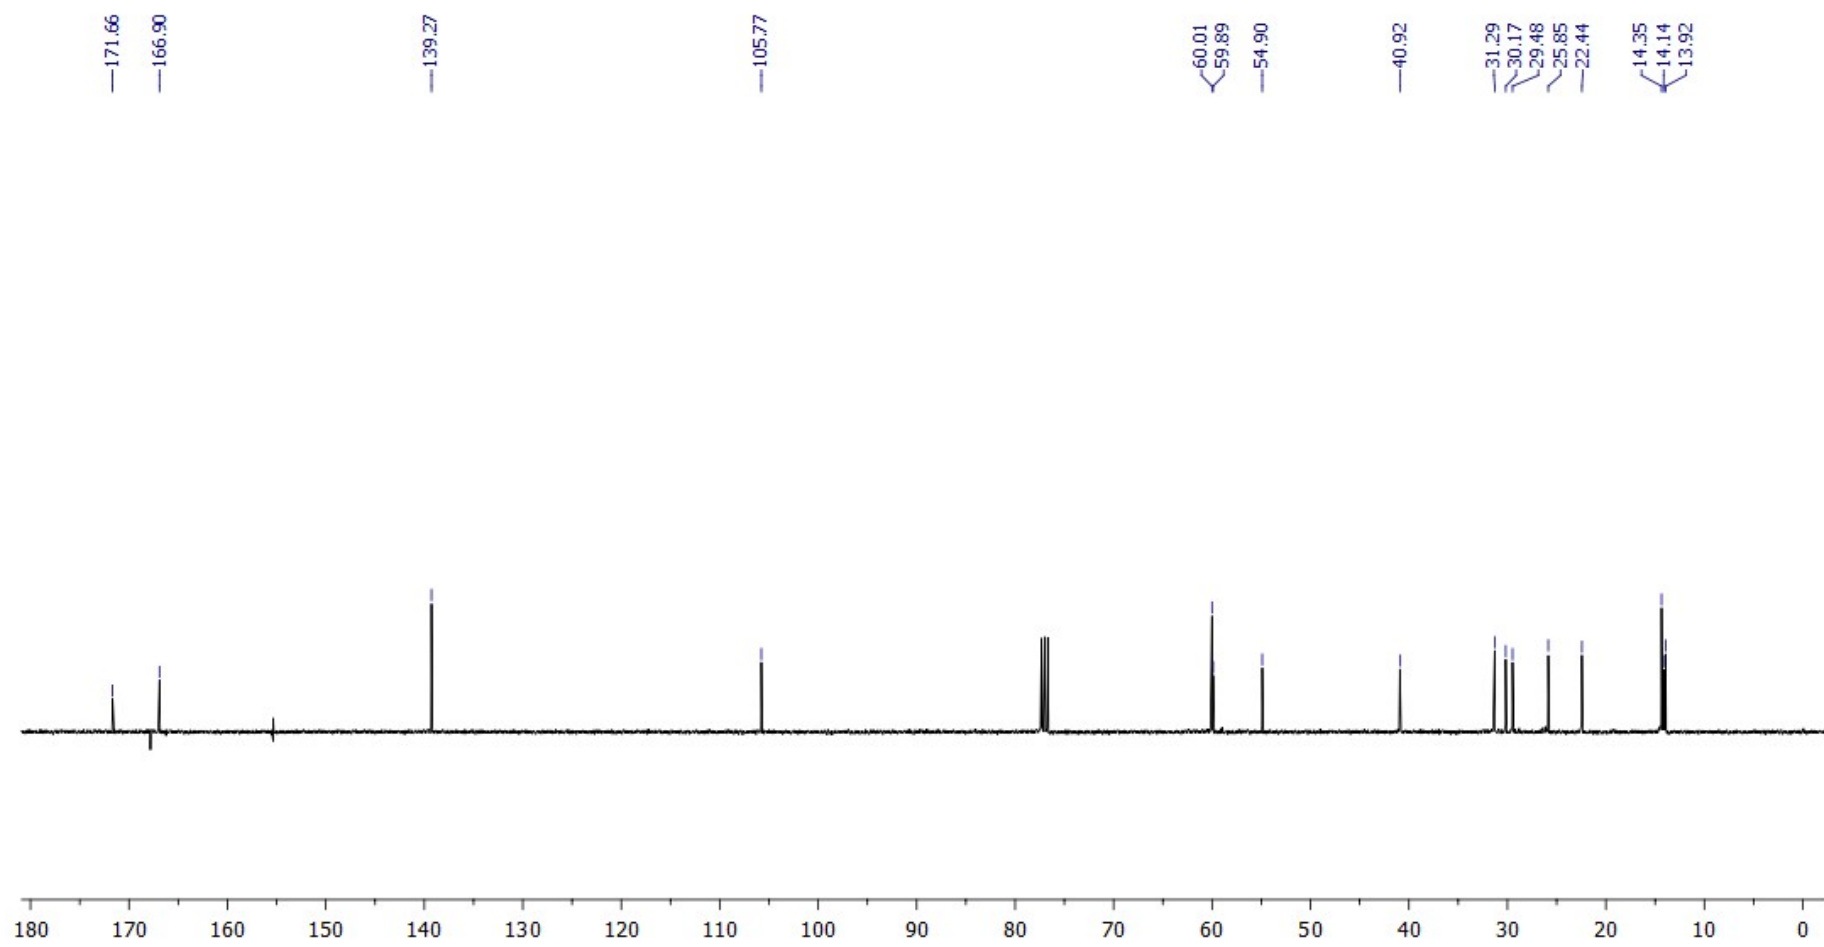

$^{13}\text{C}\{^1\text{H}\}$  NMR (100.6 MHz,  $\text{CDCl}_3$ )

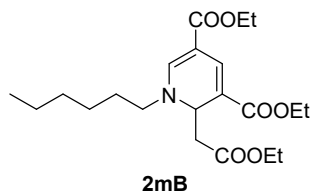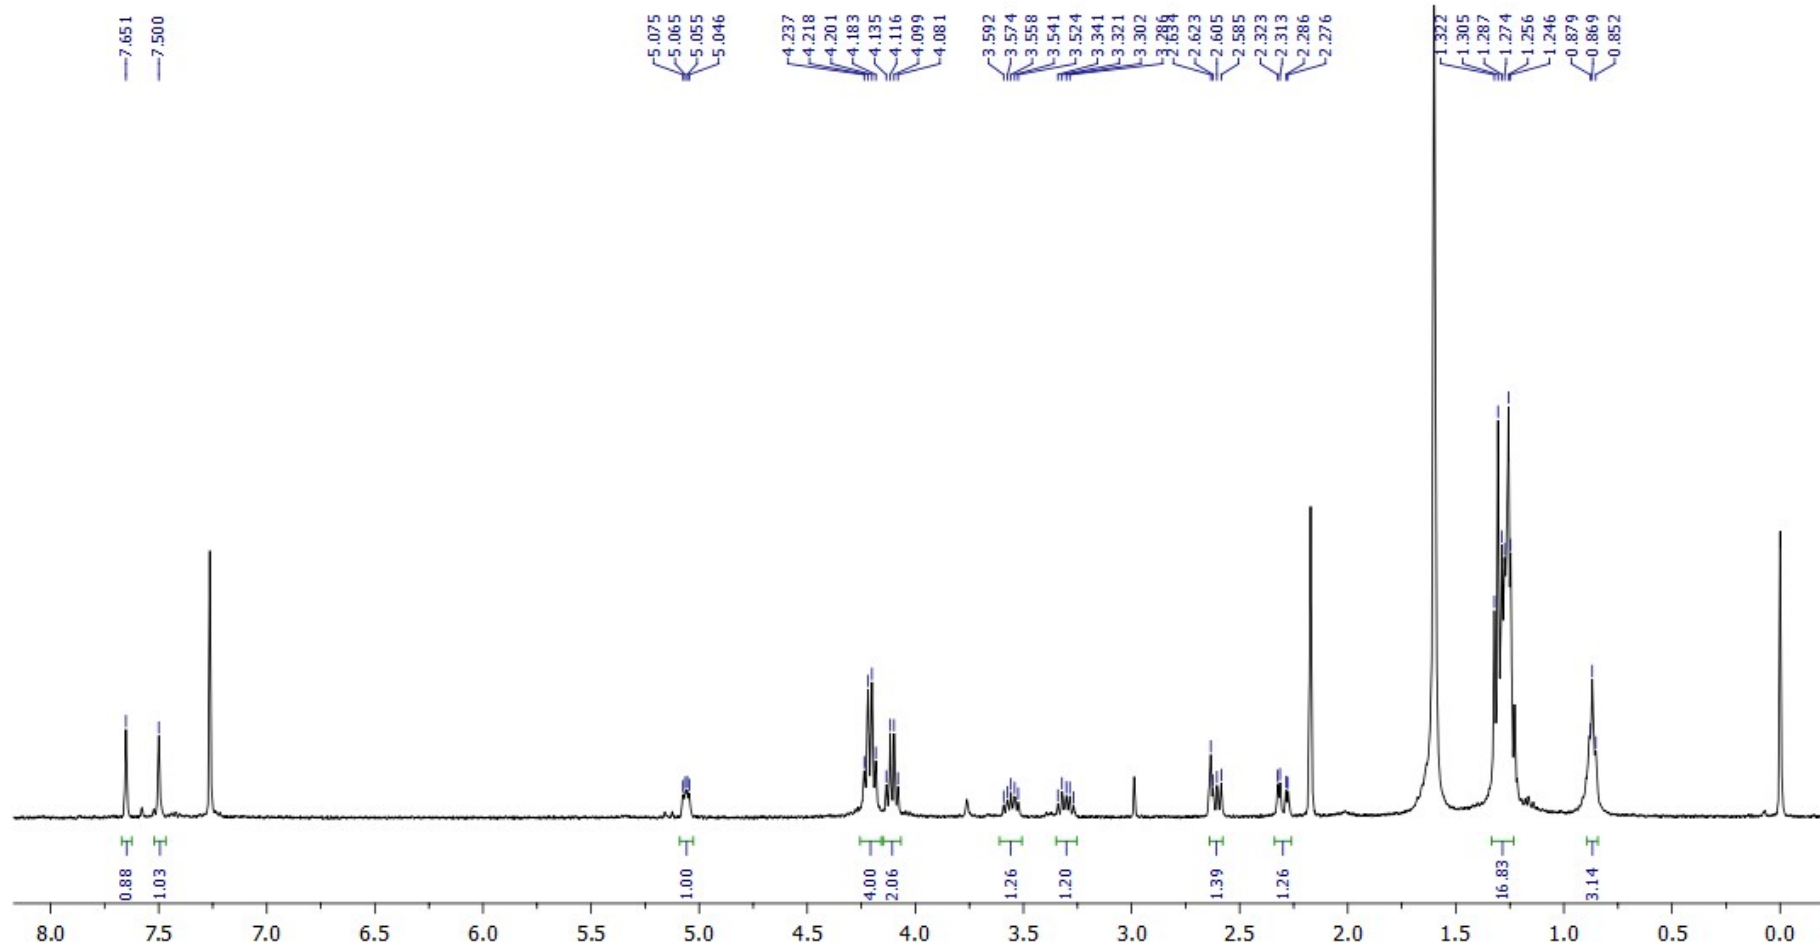

<sup>1</sup>H NMR (400.1 MHz, CDCl<sub>3</sub>)



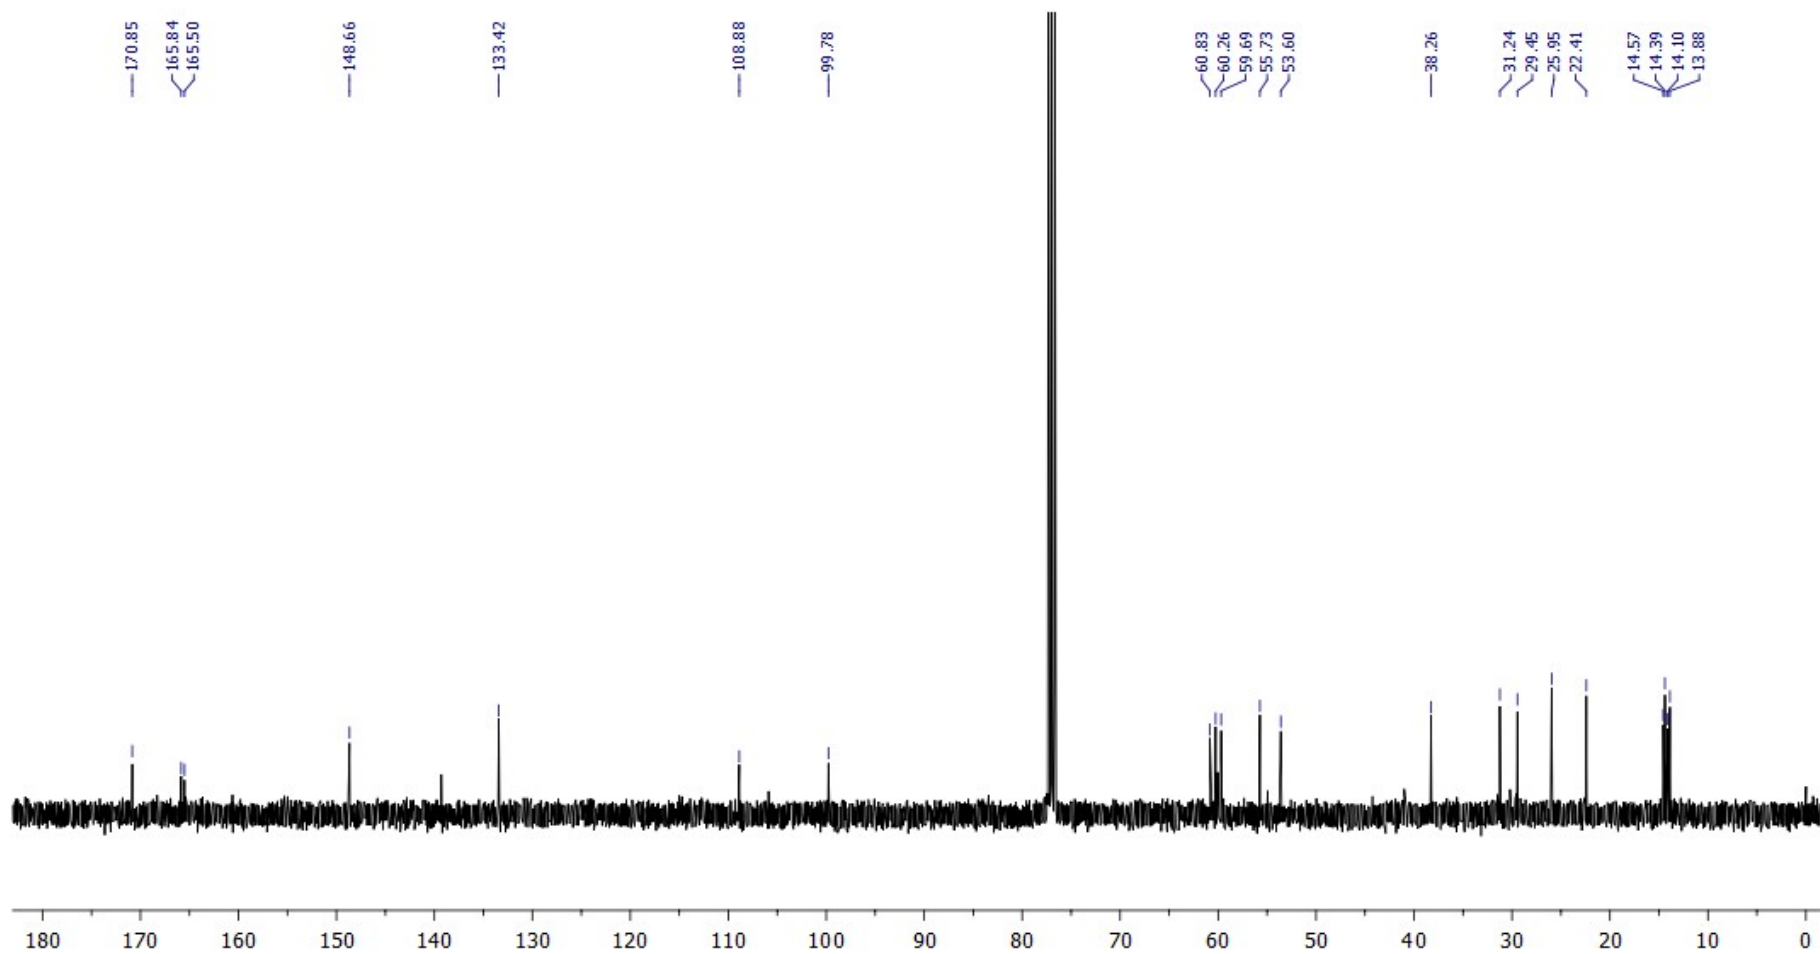

$^{13}\text{C}\{^1\text{H}\}$  NMR (100.6 MHz,  $\text{CDCl}_3$ )

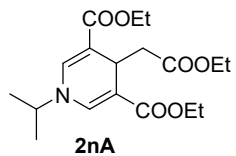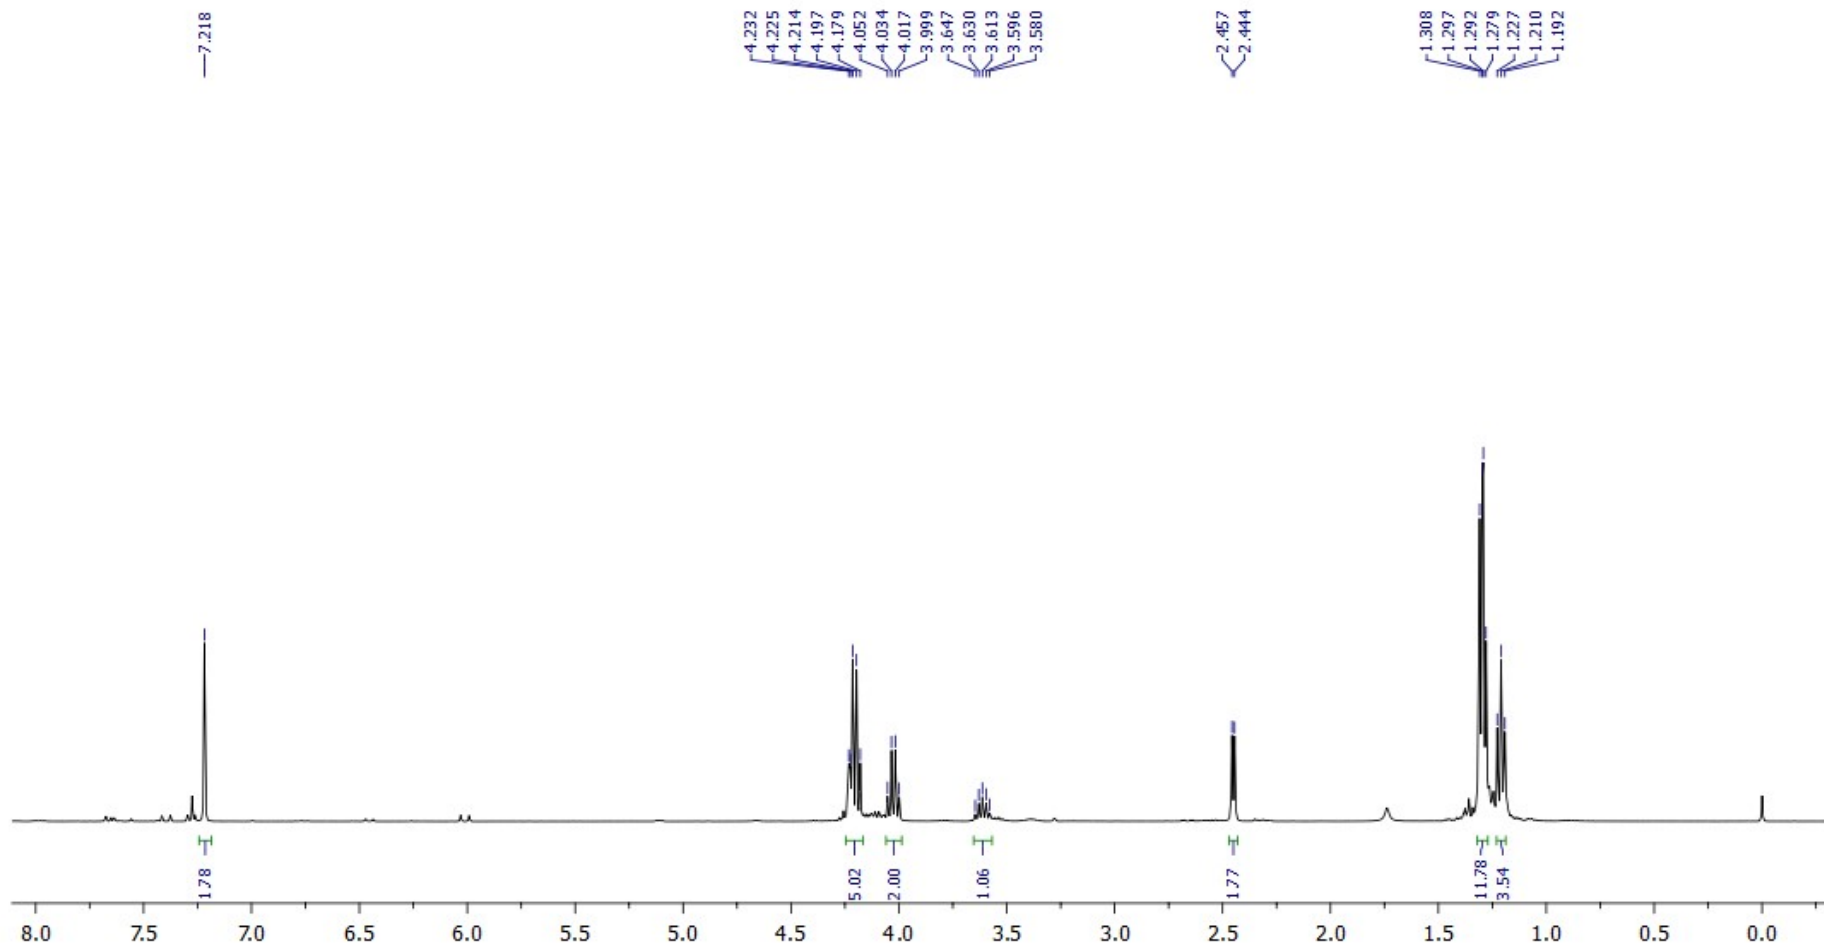

<sup>1</sup>H NMR (400.1 MHz, CDCl<sub>3</sub>)

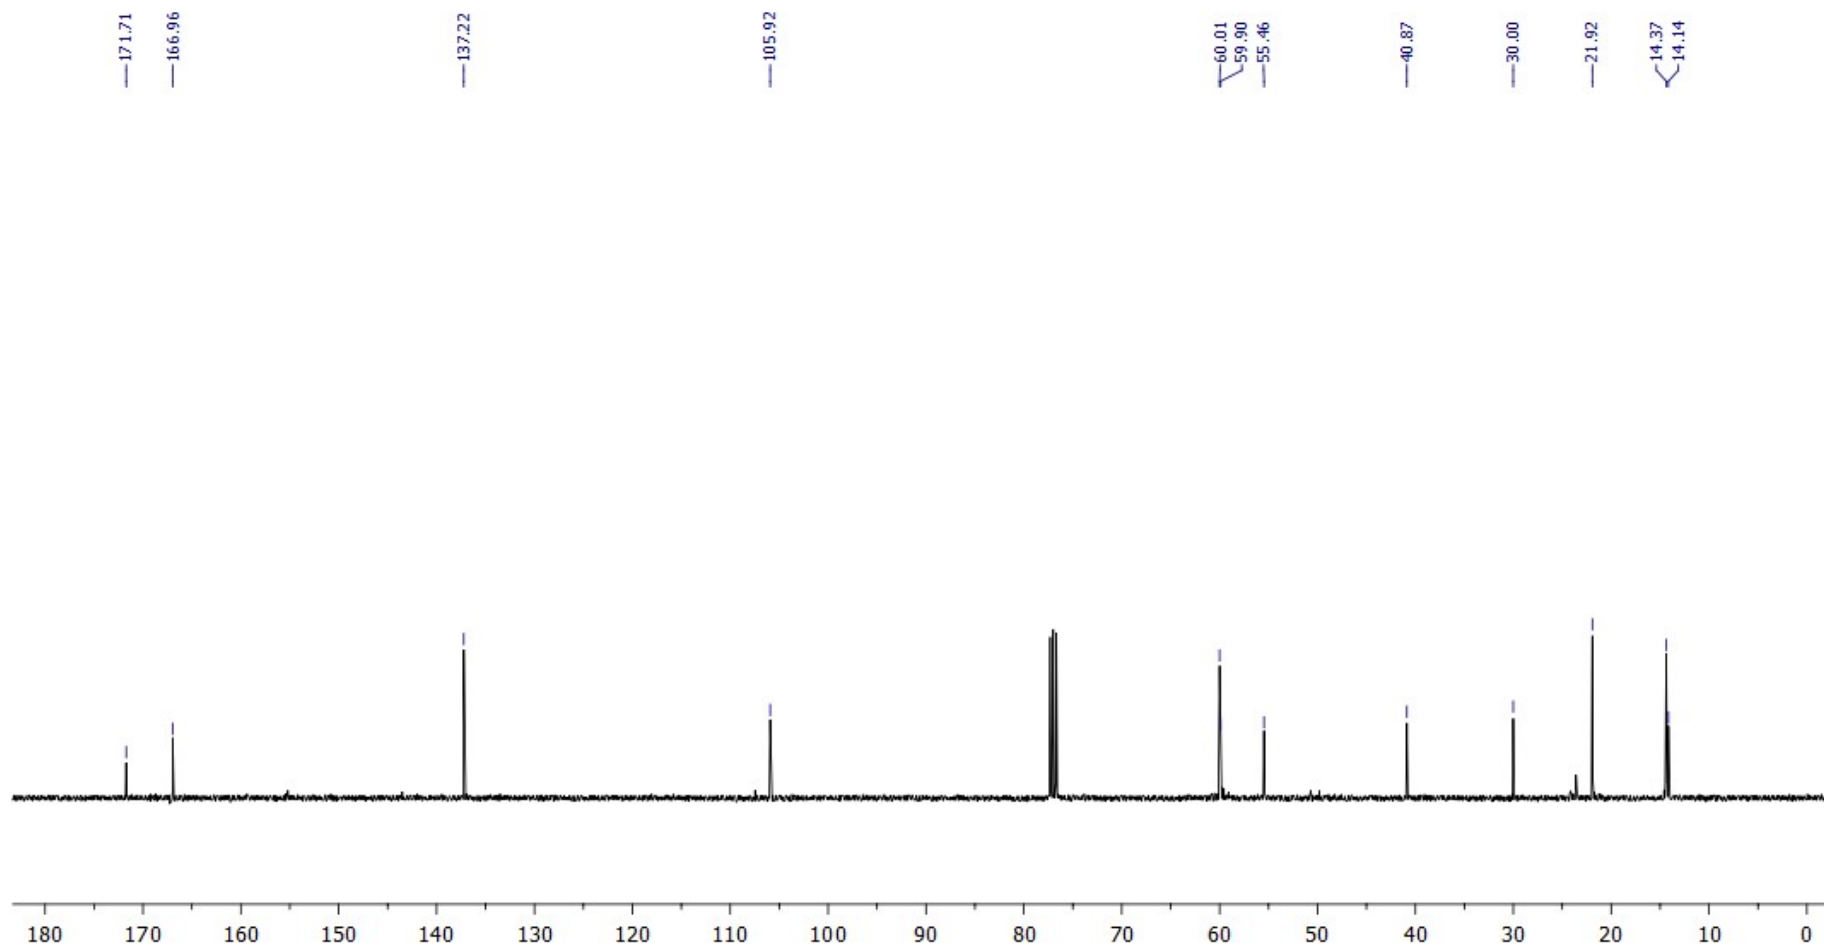

$^{13}\text{C}\{^1\text{H}\}$  NMR (100.6 MHz,  $\text{CDCl}_3$ )

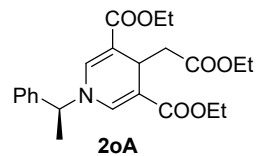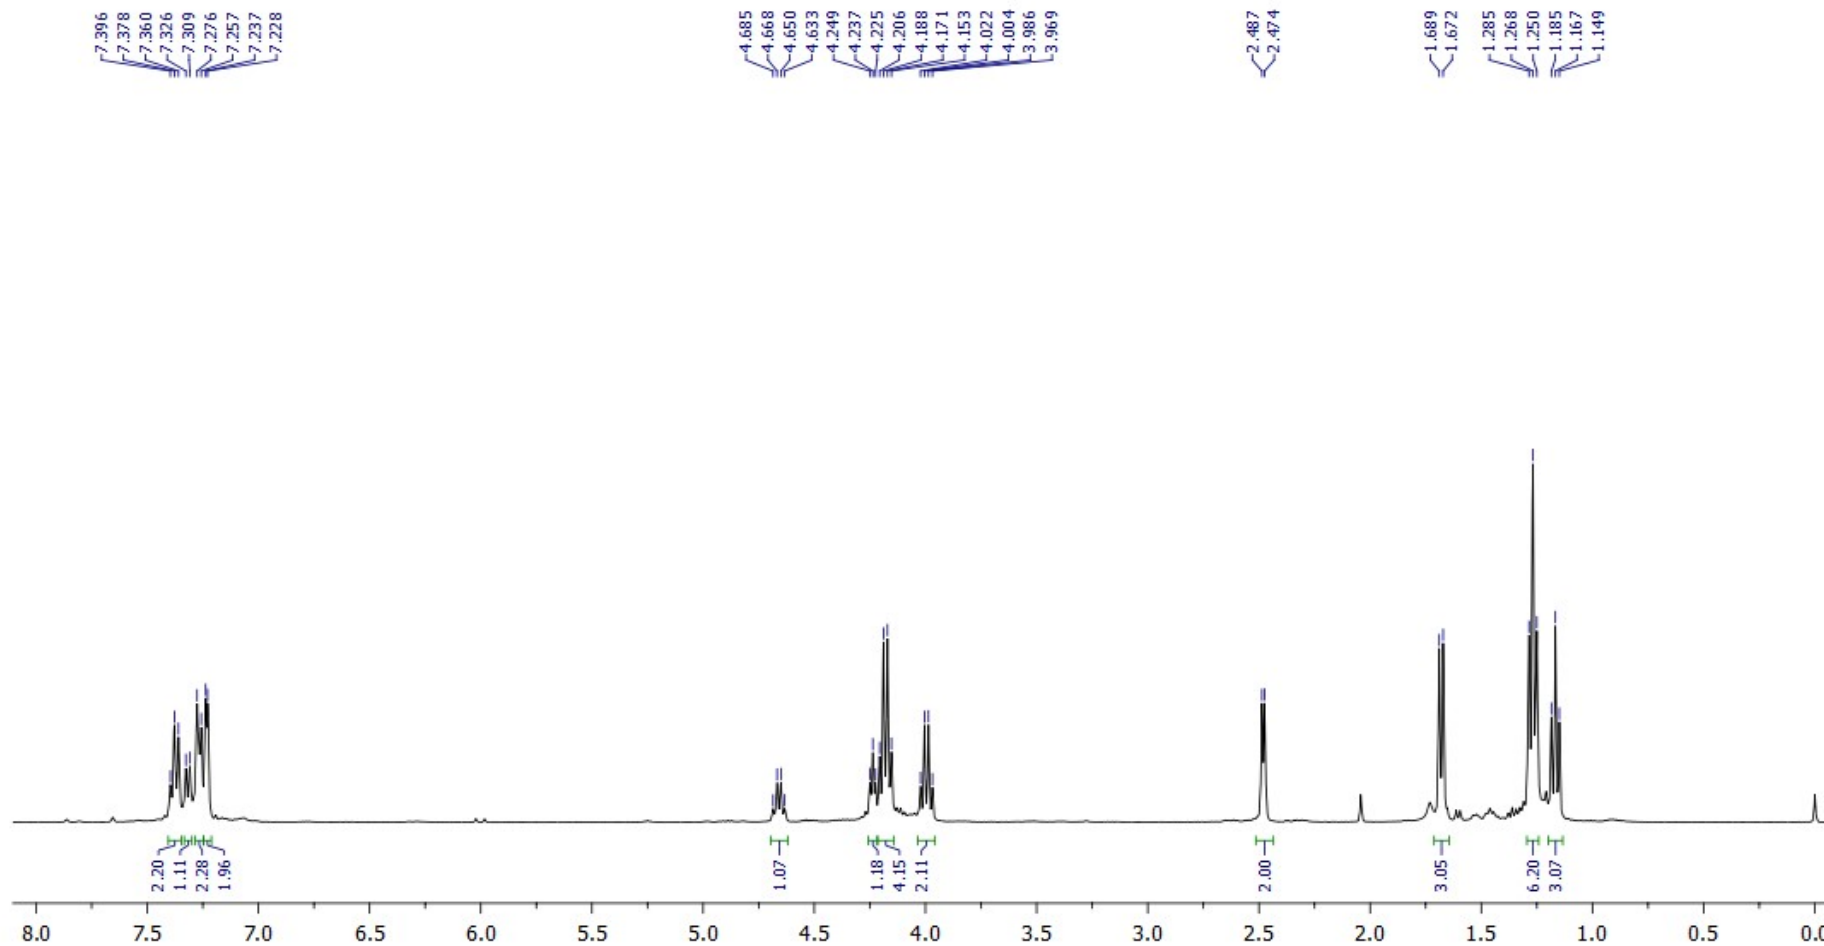

<sup>1</sup>H NMR (400.1 MHz, CDCl<sub>3</sub>)

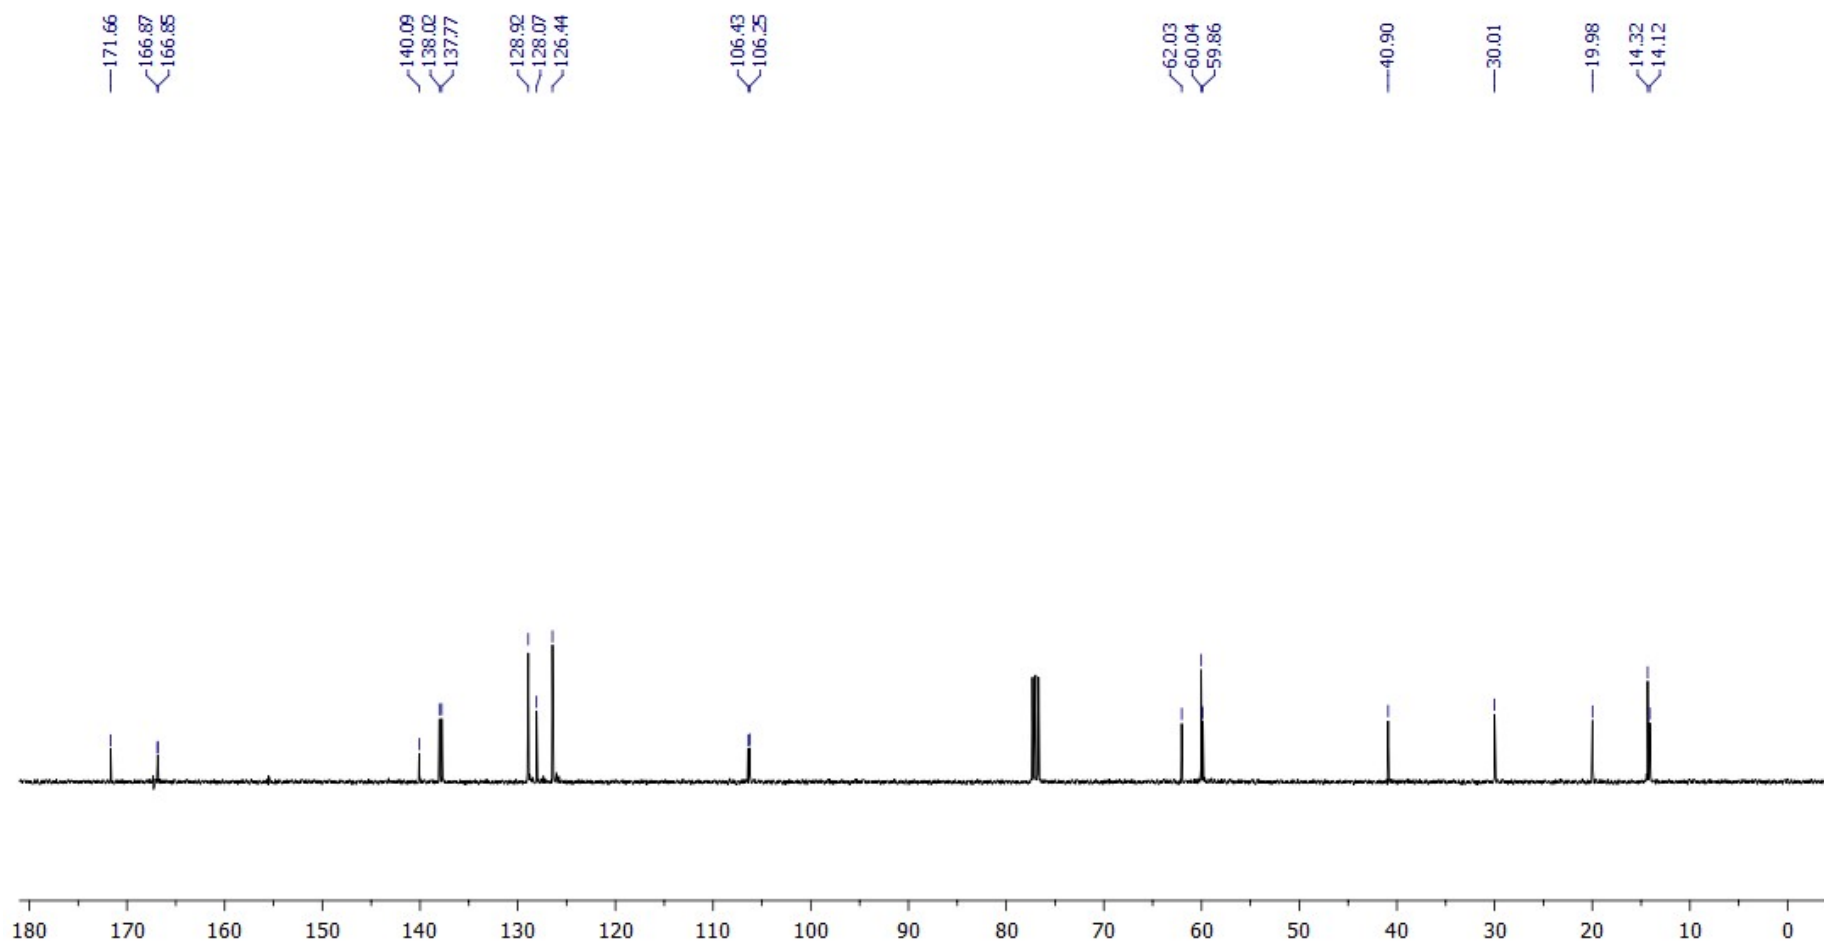

$^{13}\text{C}\{^1\text{H}\}$  NMR (100.6 MHz,  $\text{CDCl}_3$ )

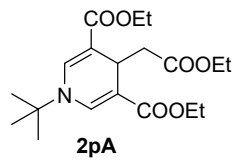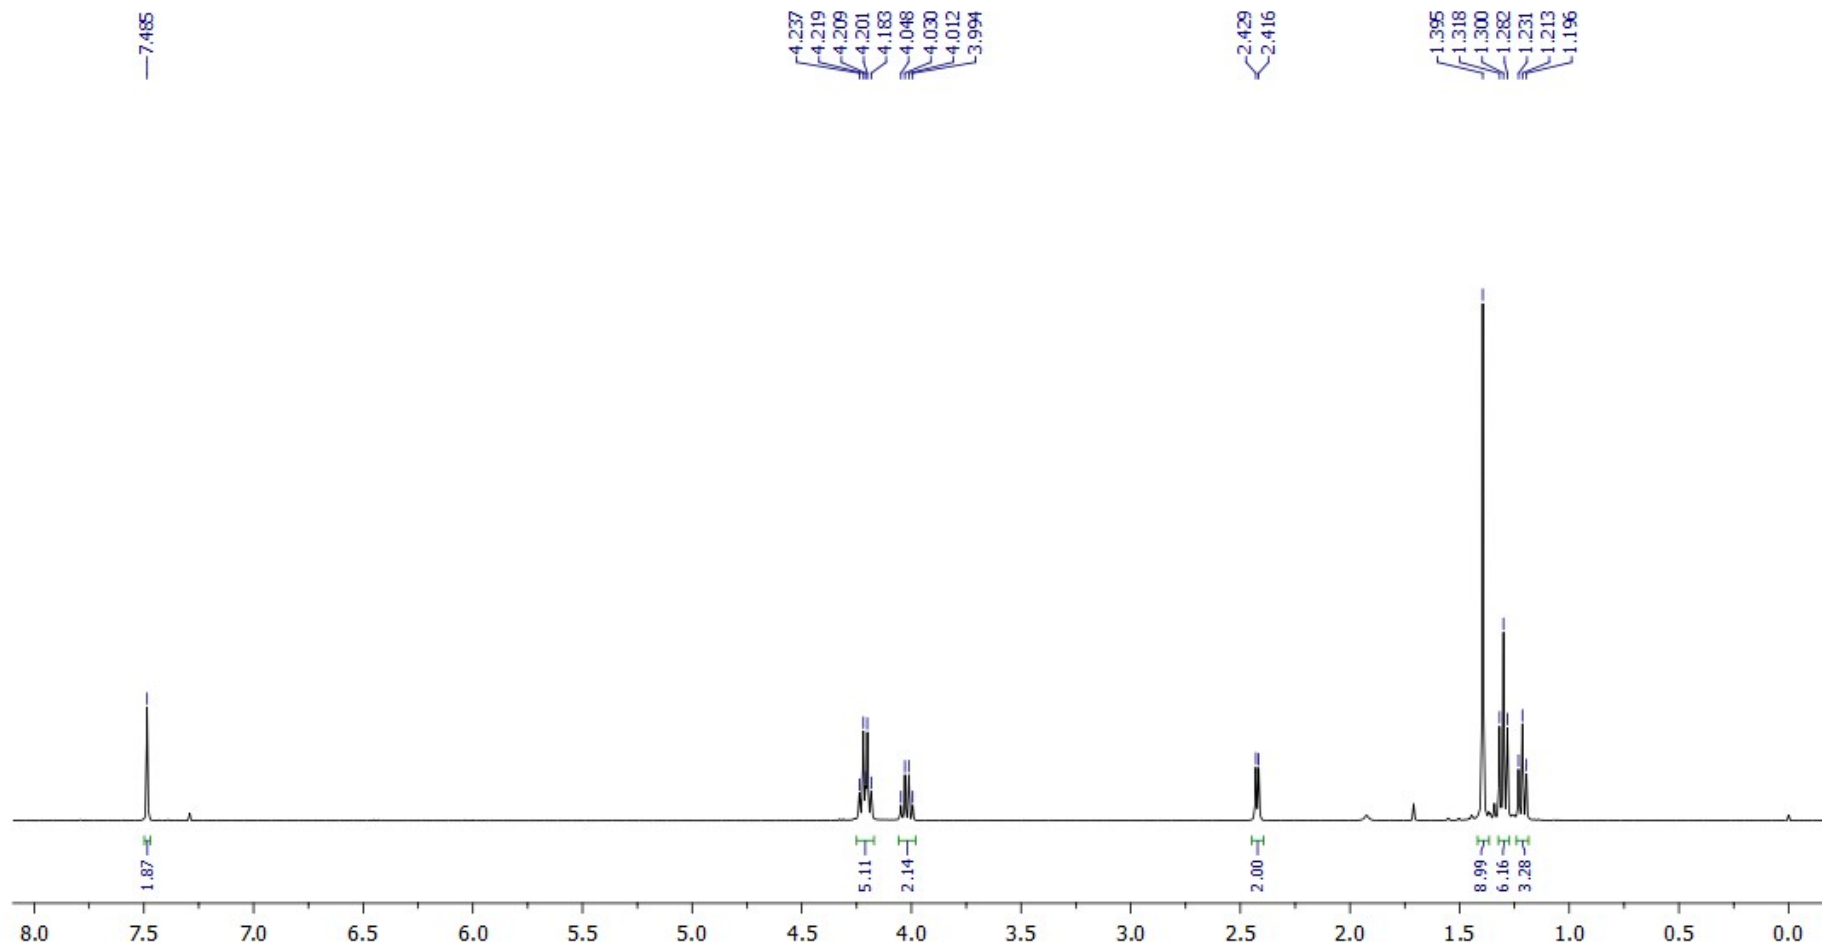

<sup>1</sup>H NMR (400.1 MHz, CDCl<sub>3</sub>)

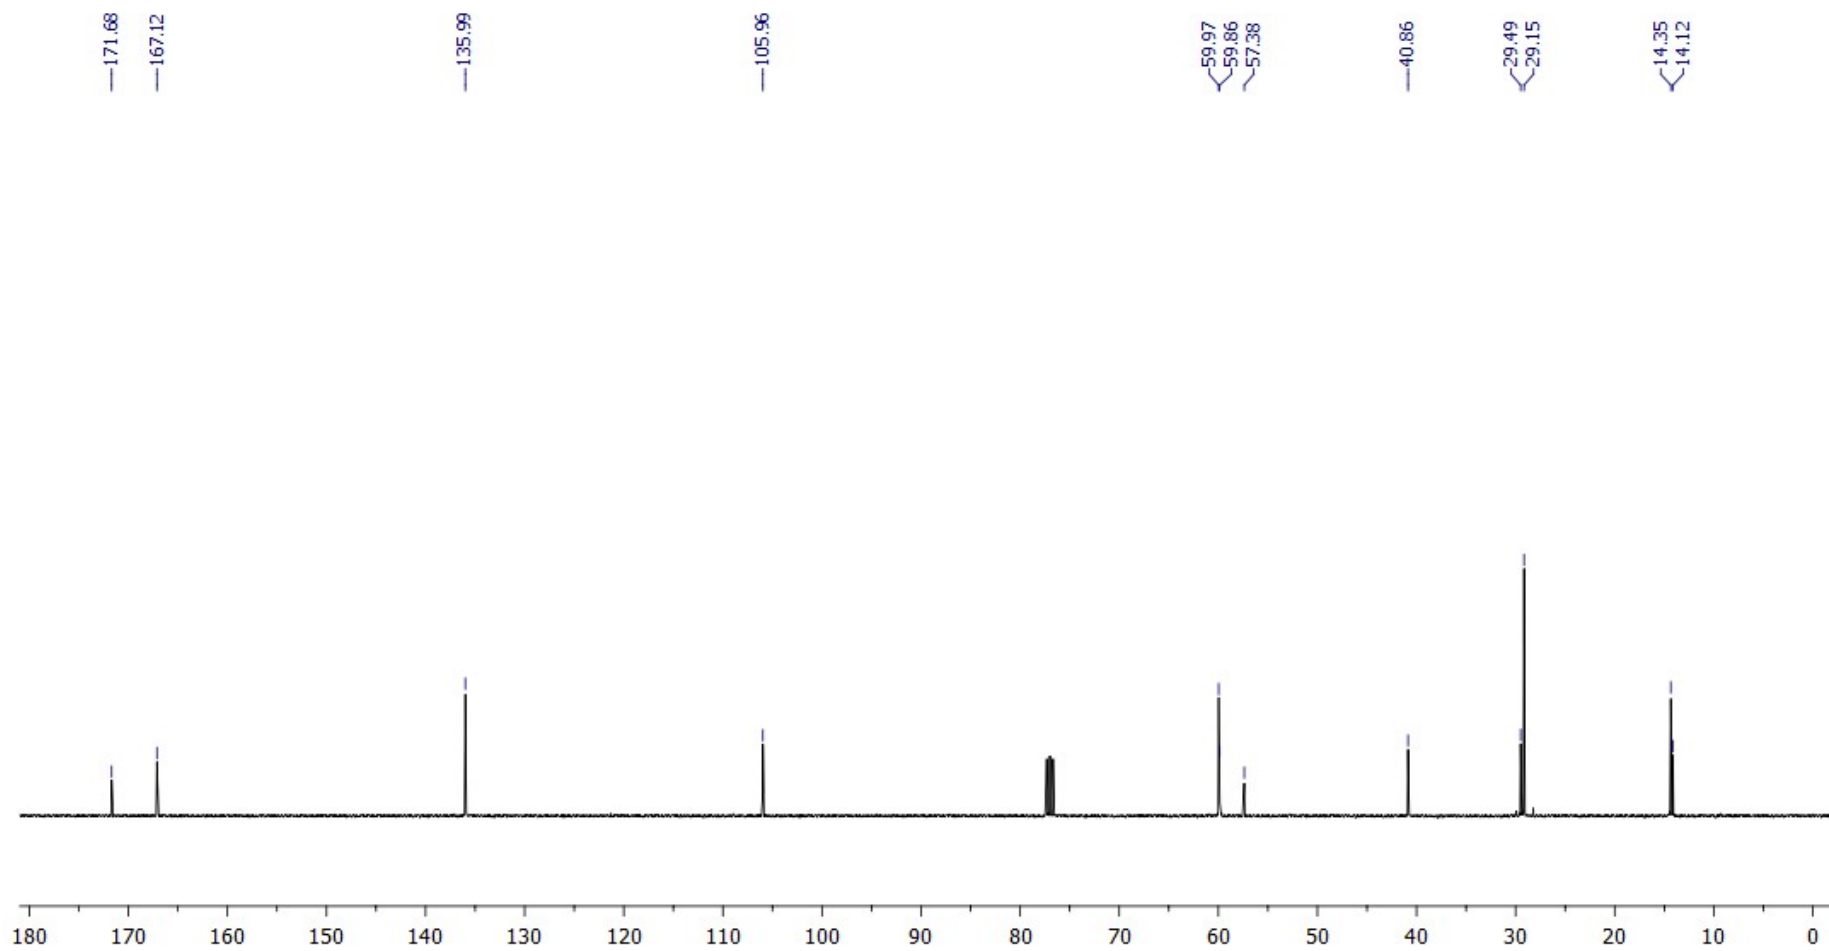

$^{13}\text{C}\{^1\text{H}\}$  NMR (100.6 MHz,  $\text{CDCl}_3$ )

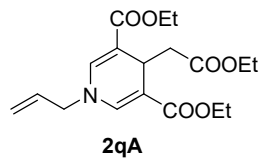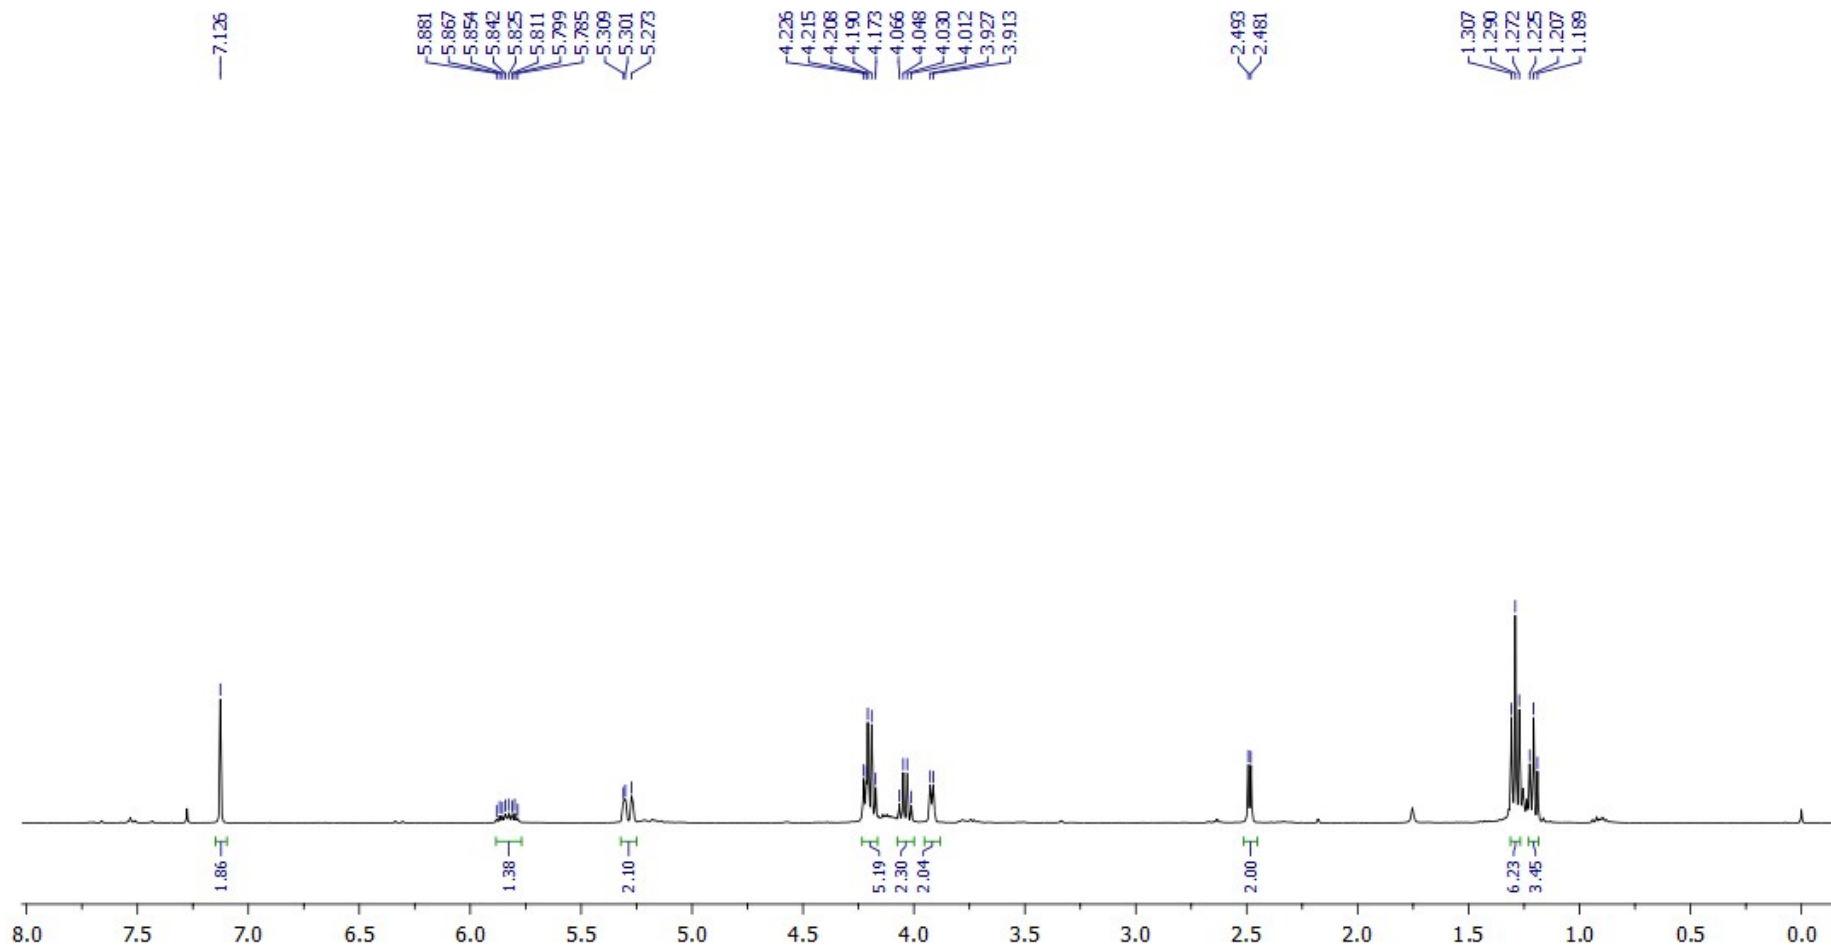

<sup>1</sup>H NMR (400.1 MHz, CDCl<sub>3</sub>)



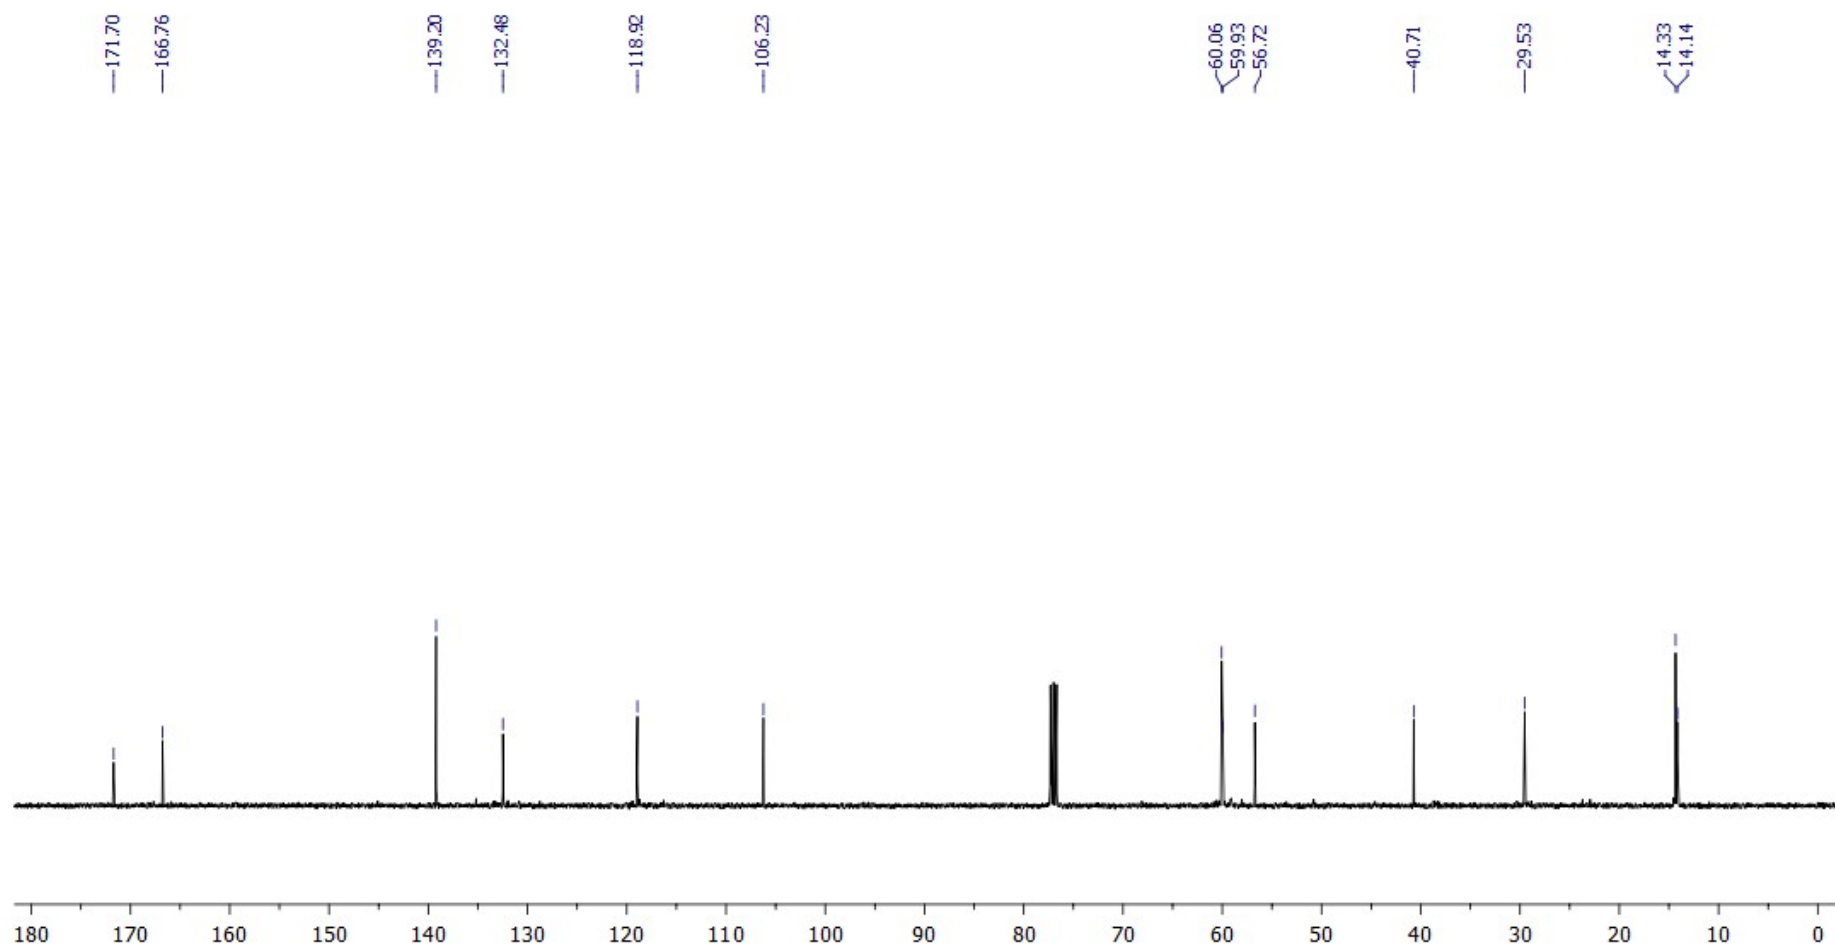

$^{13}\text{C}\{^1\text{H}\}$  NMR (100.6 MHz,  $\text{CDCl}_3$ )

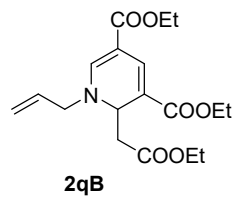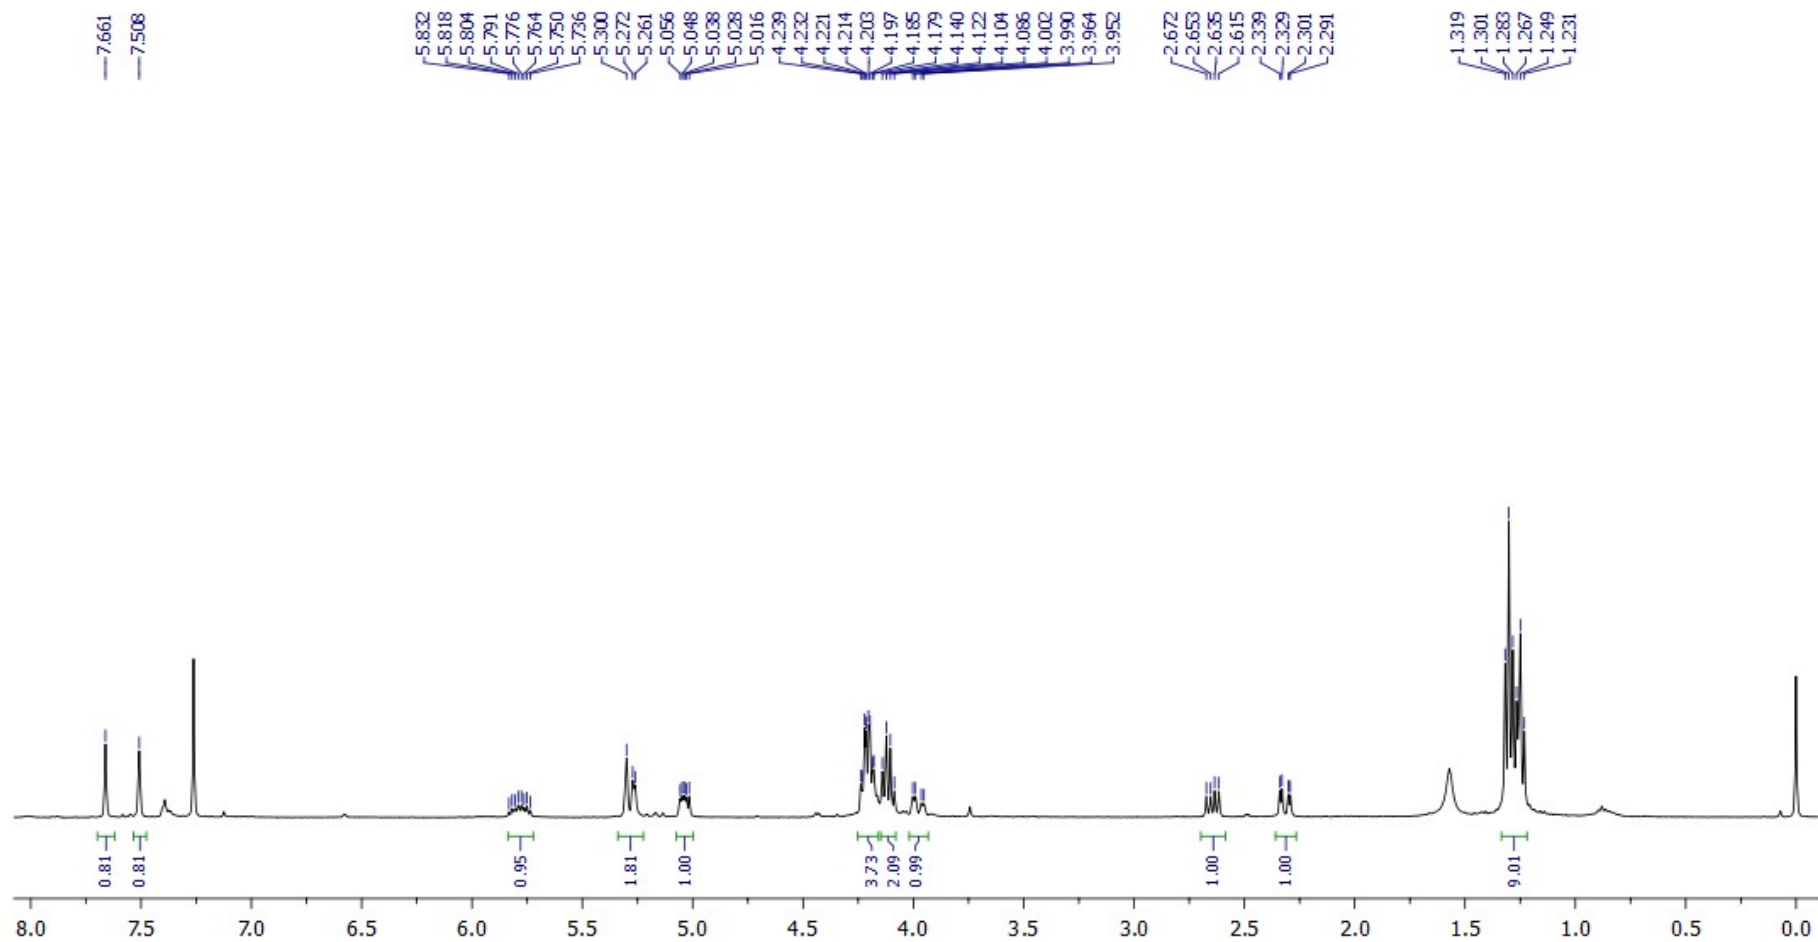

<sup>1</sup>H NMR (400.1 MHz, CDCl<sub>3</sub>)

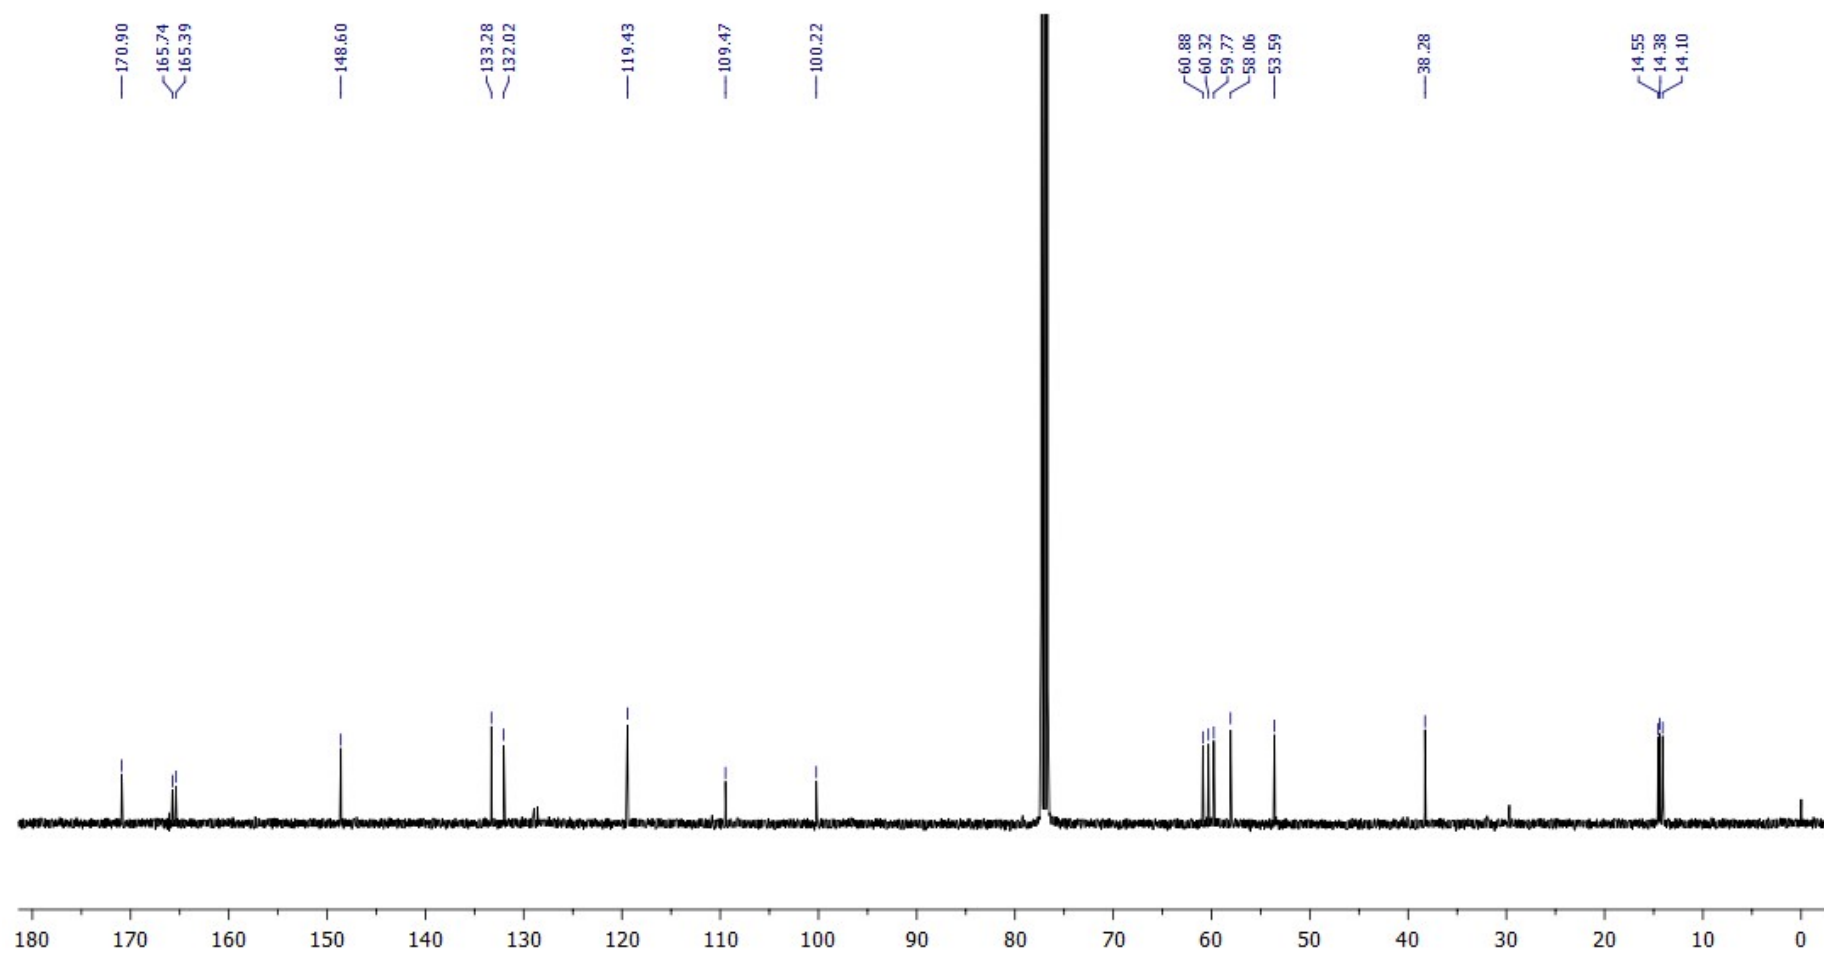

$^{13}\text{C}\{^1\text{H}\}$  NMR (100.6 MHz,  $\text{CDCl}_3$ )

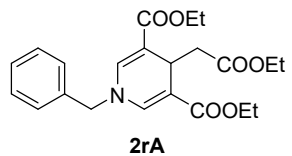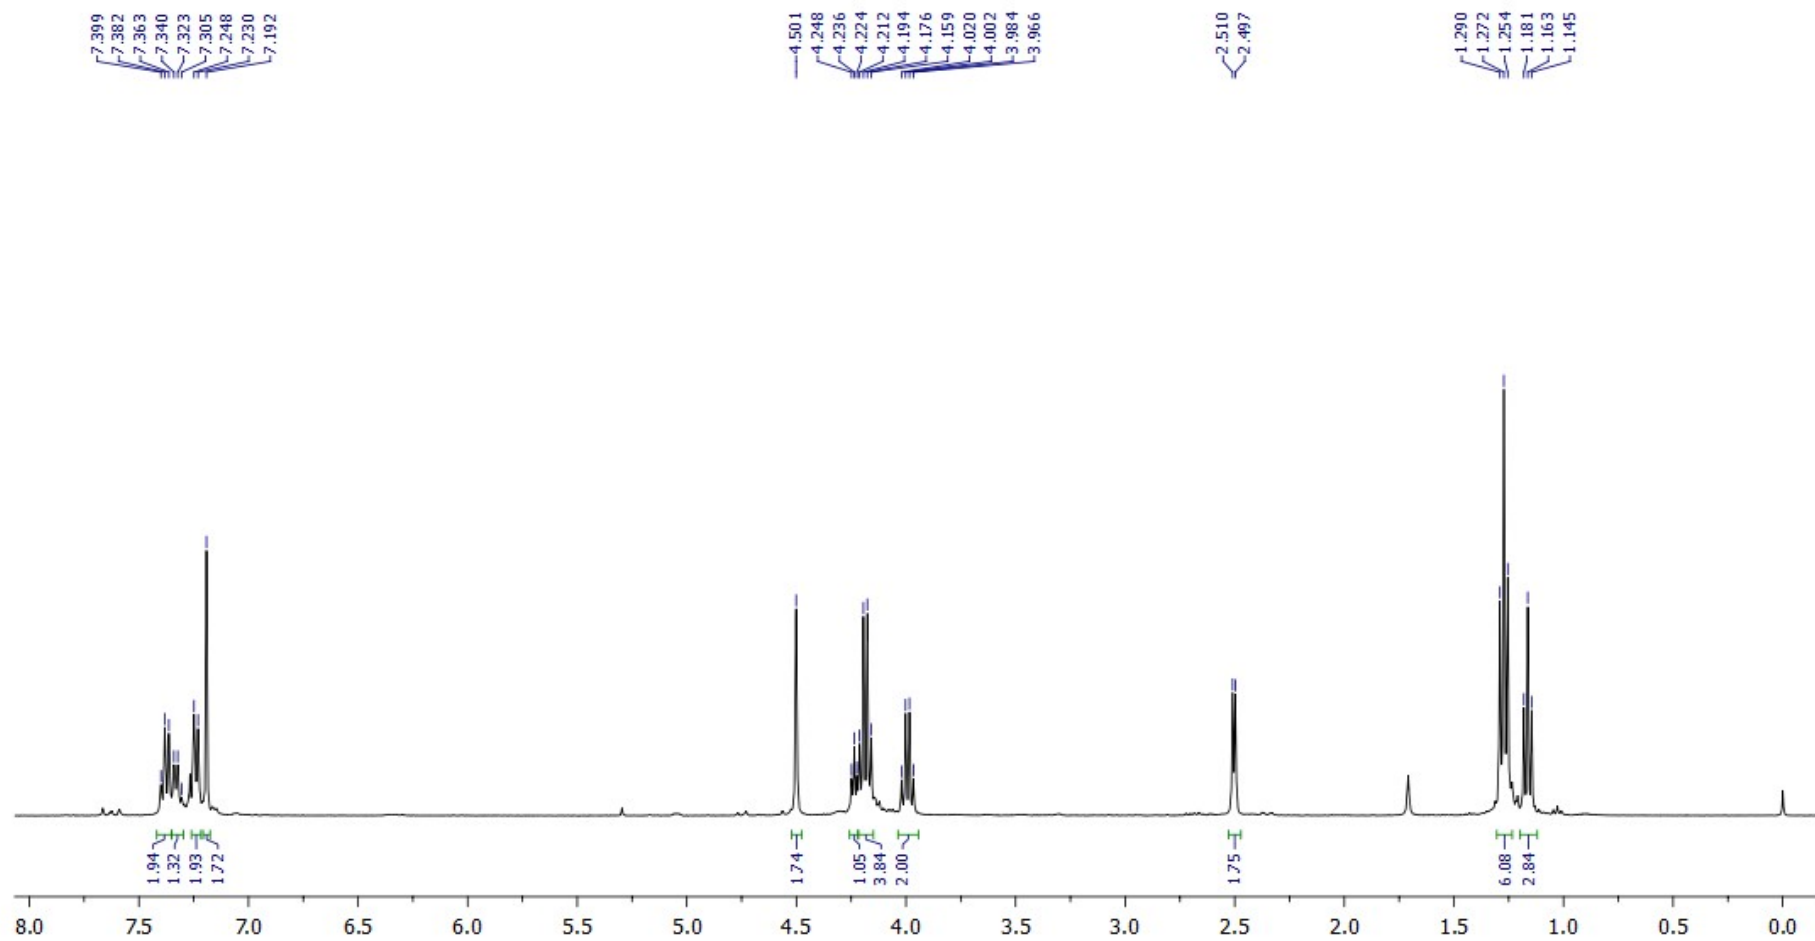

$^1\text{H NMR}$  (400.1 MHz,  $\text{CDCl}_3$ )

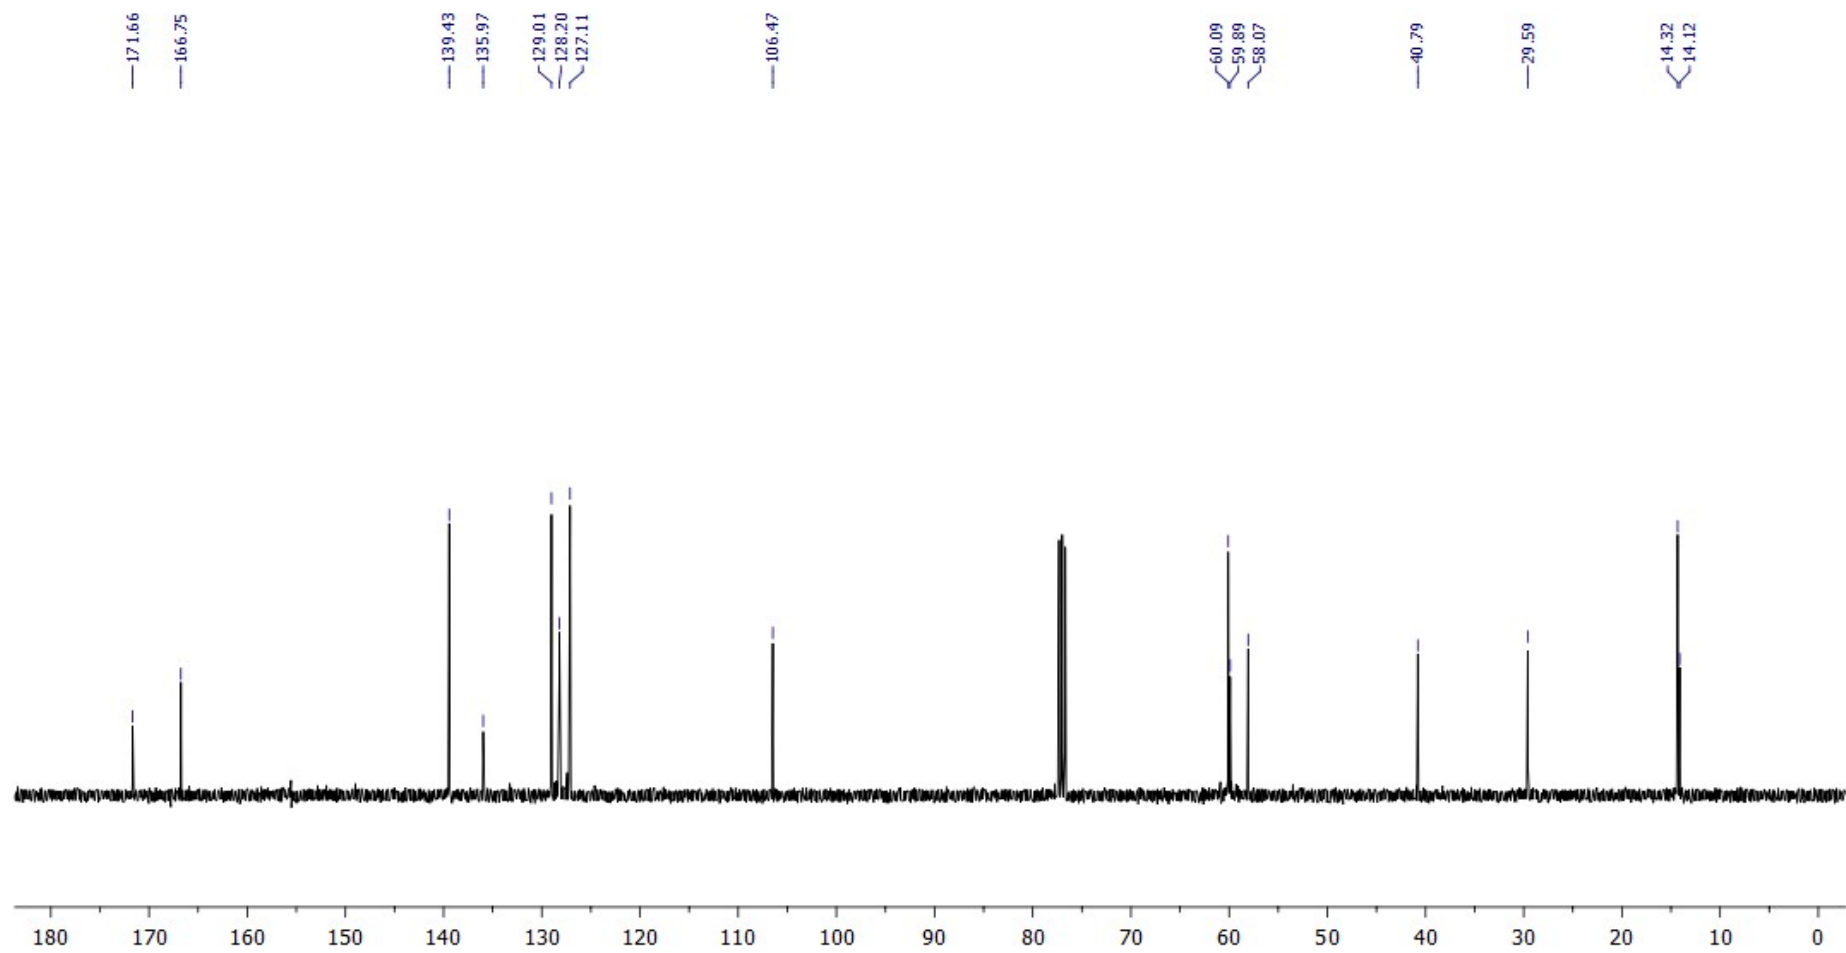

$^{13}\text{C}\{^1\text{H}\}$  NMR (100.6 MHz,  $\text{CDCl}_3$ )

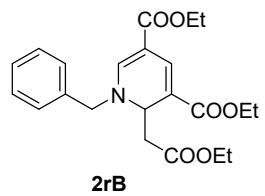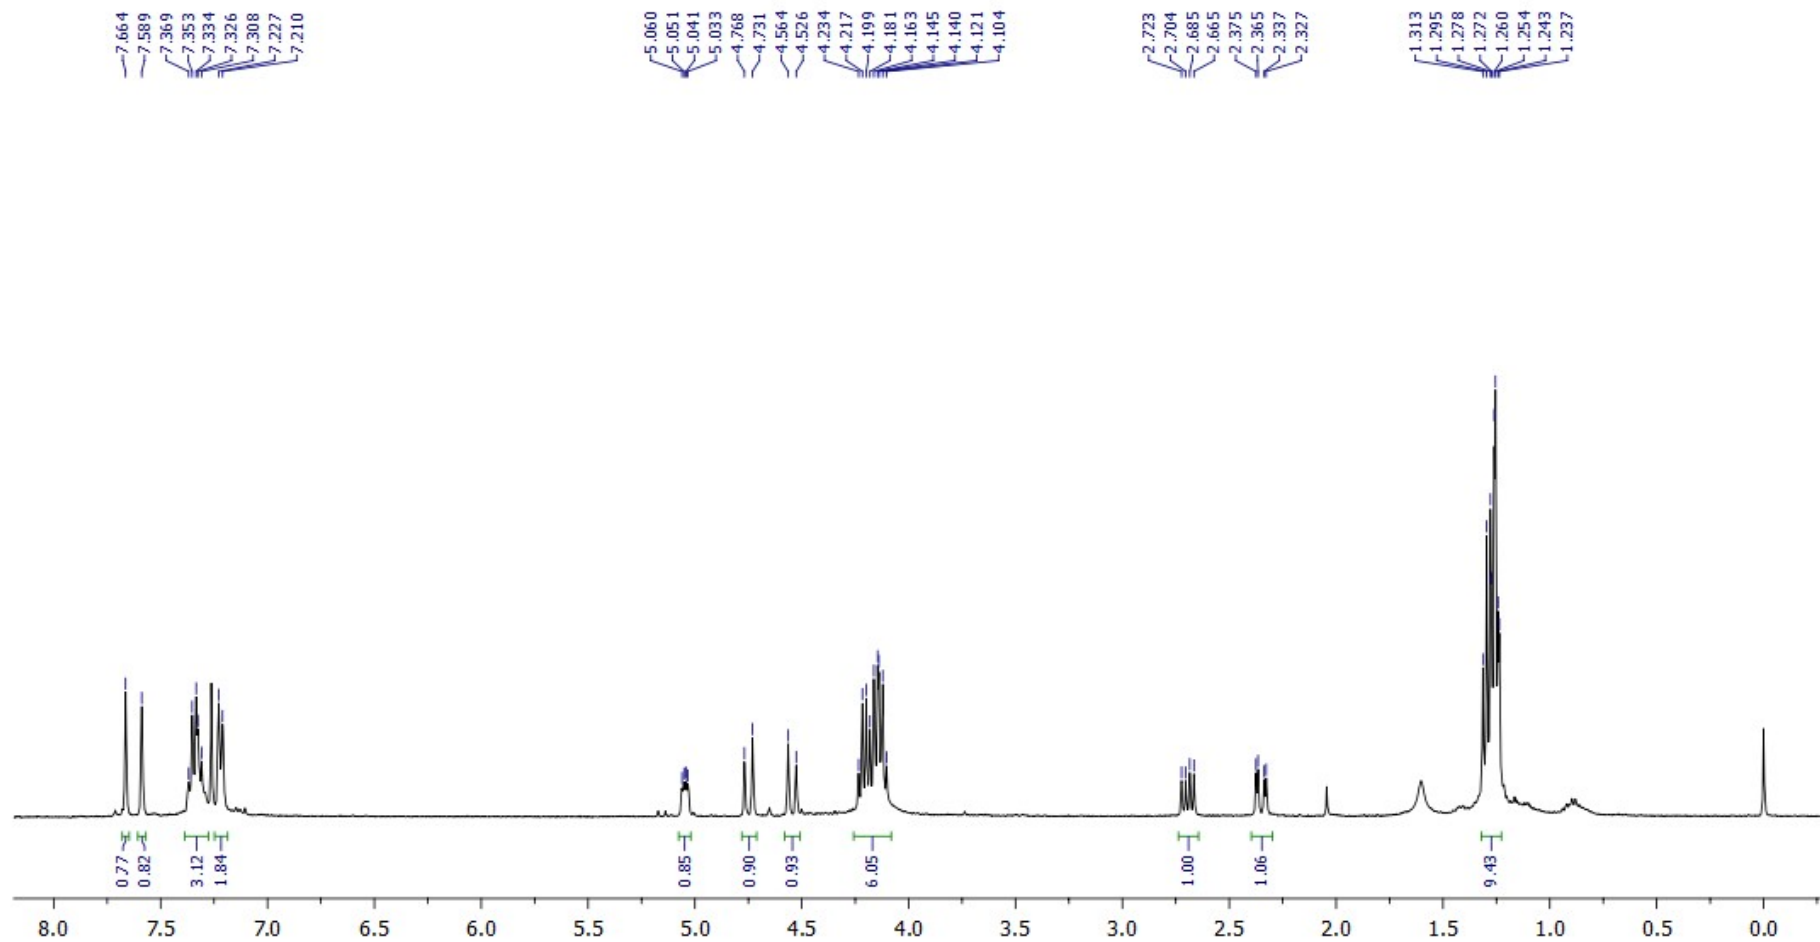

$^1\text{H NMR}$  (400.1 MHz,  $\text{CDCl}_3$ )

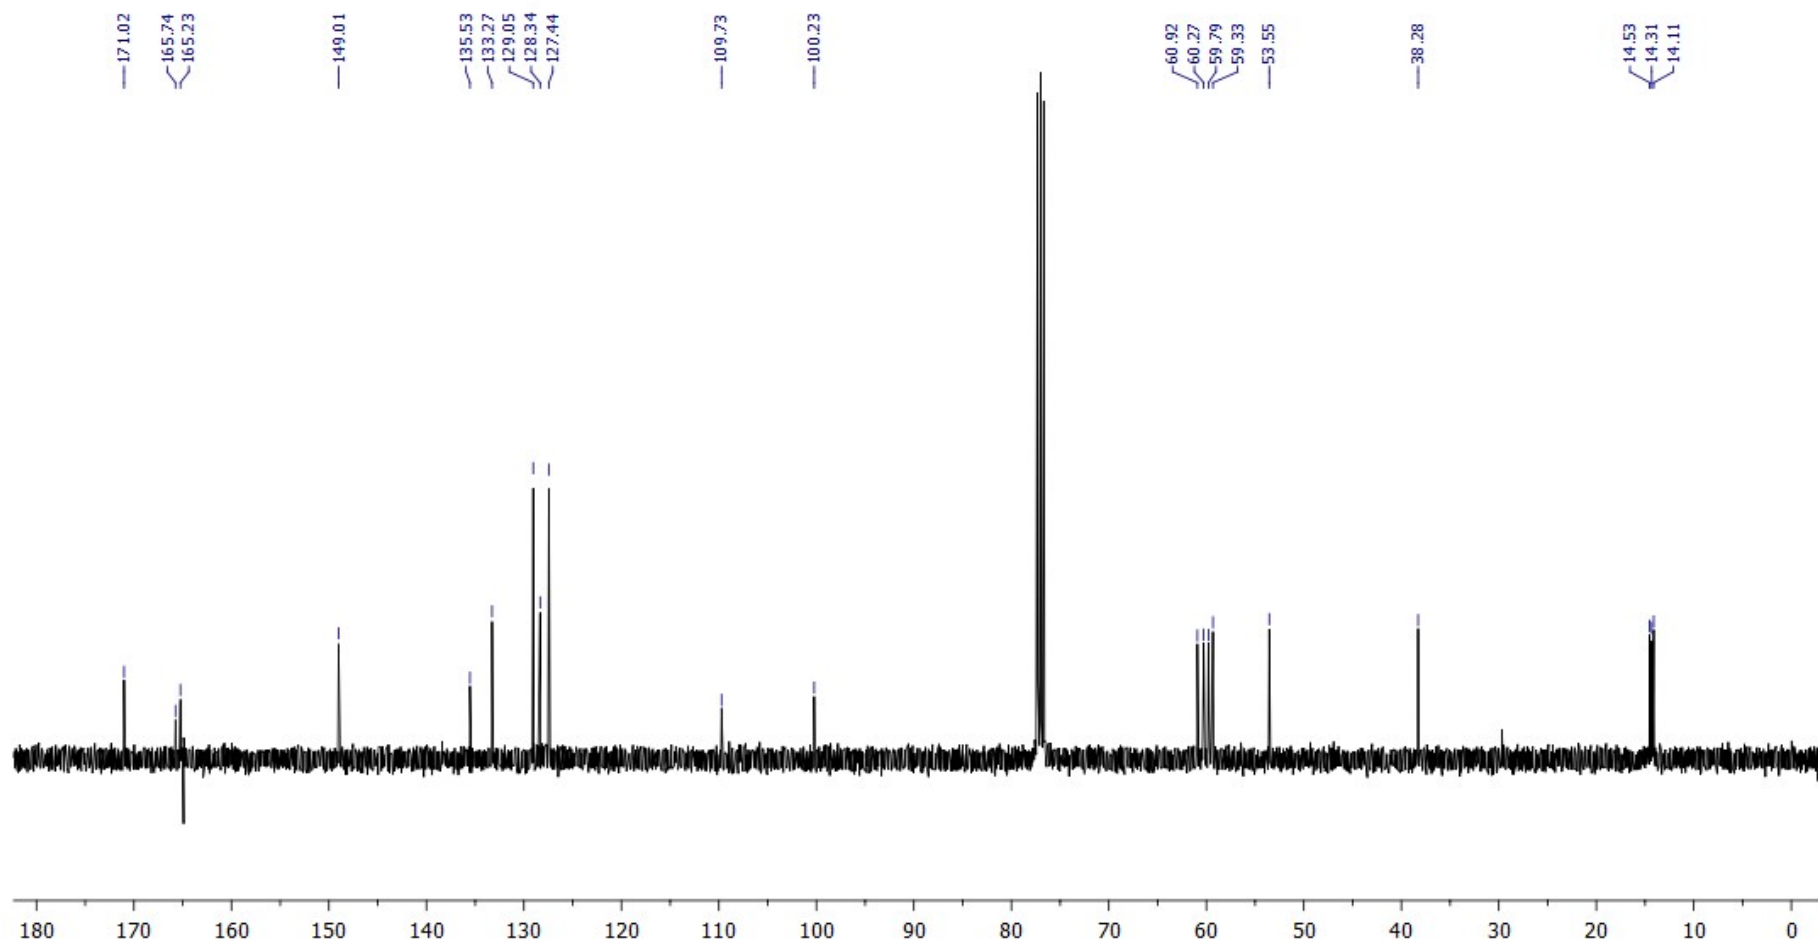

$^{13}\text{C}\{^1\text{H}\}$  NMR (100.6 MHz,  $\text{CDCl}_3$ )

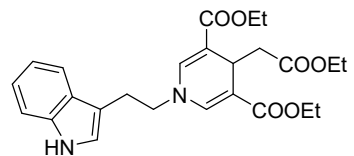

2sA

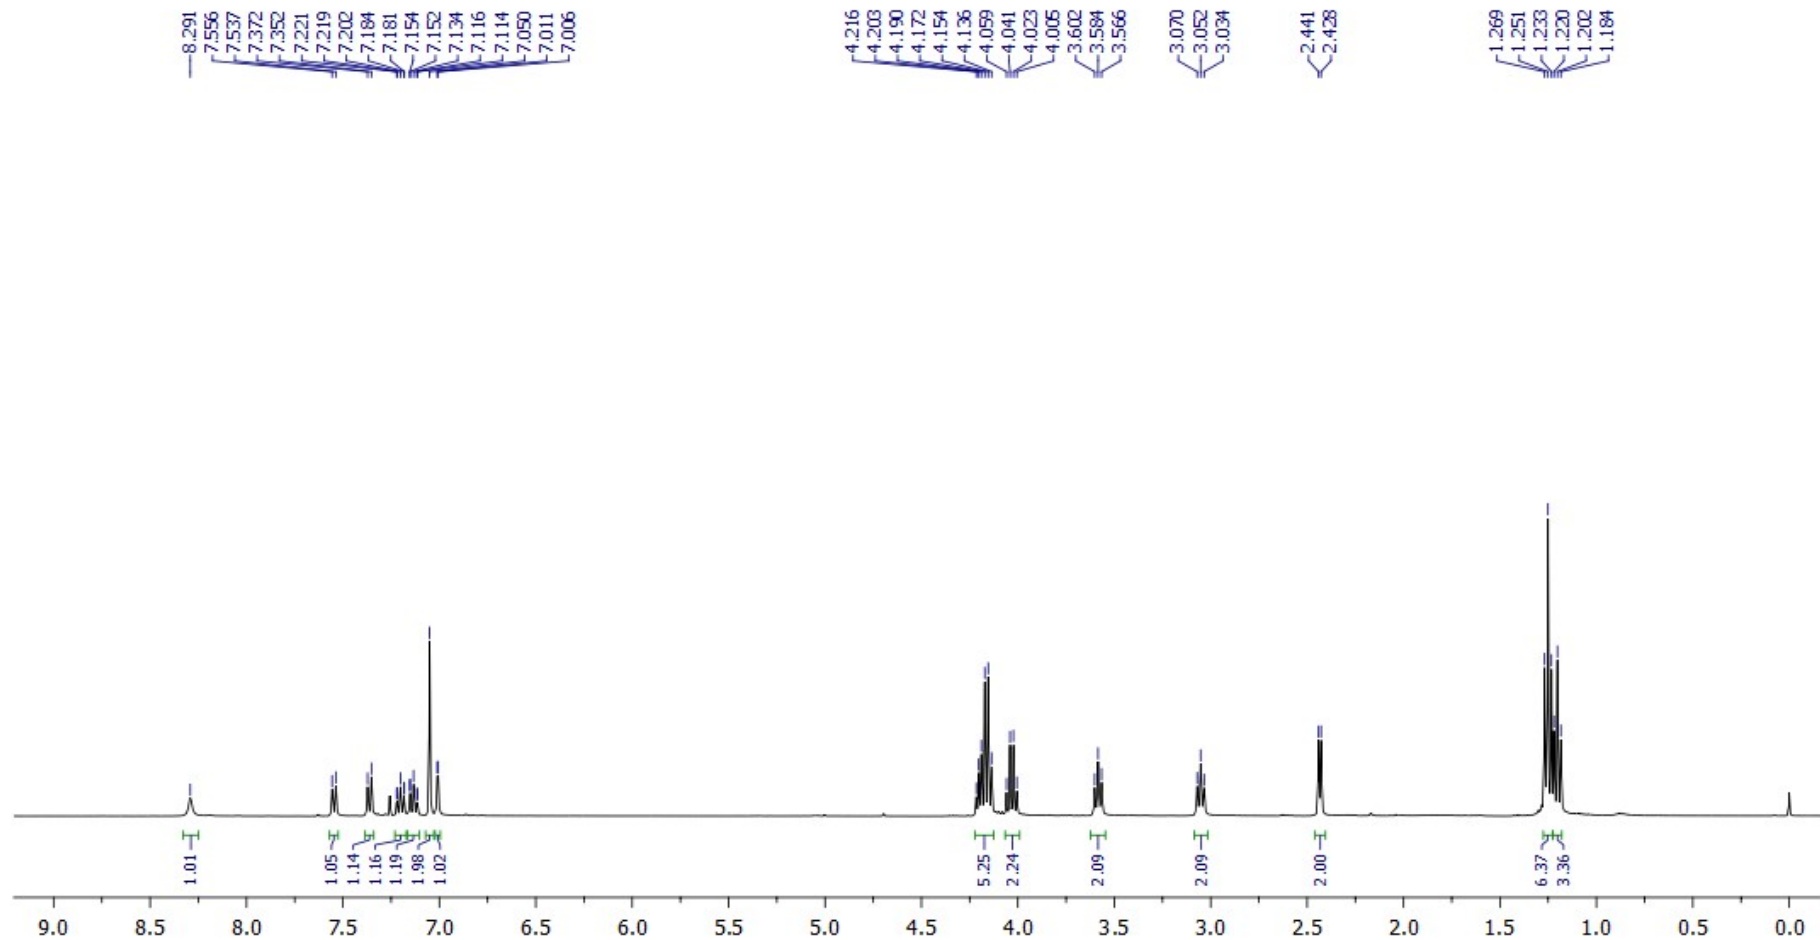

<sup>1</sup>H NMR (400.1 MHz, CDCl<sub>3</sub>)



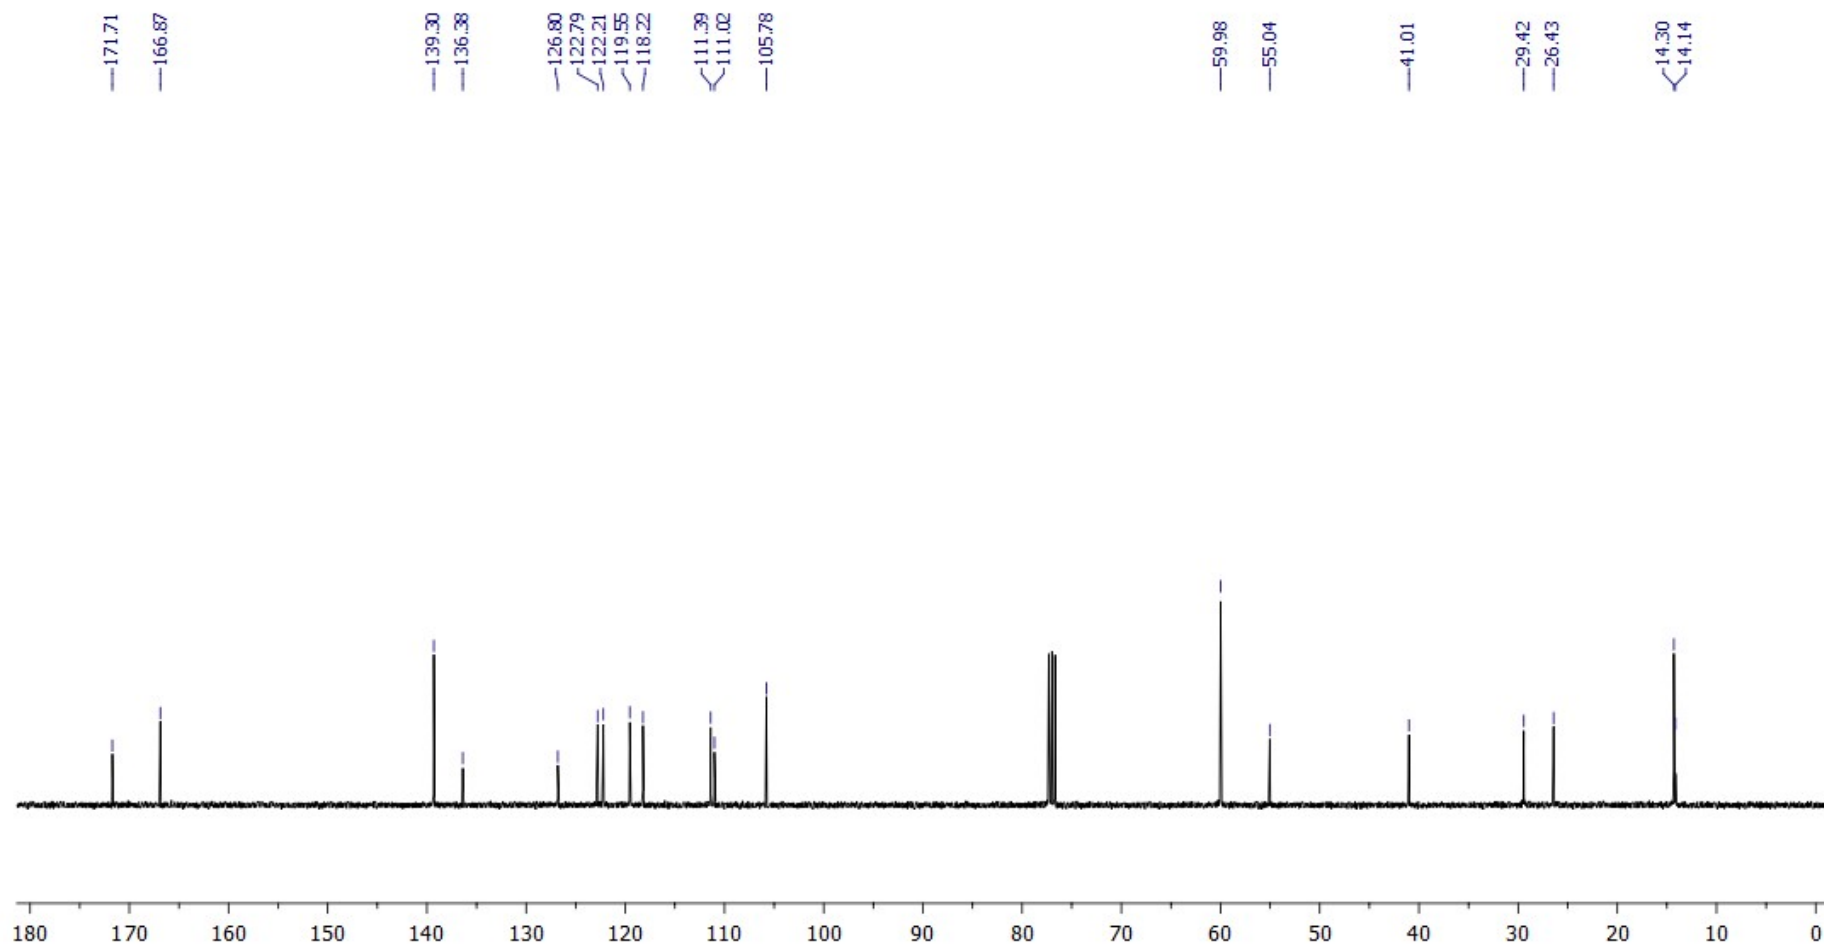

$^{13}\text{C}\{^1\text{H}\}$  NMR (100.6 MHz,  $\text{CDCl}_3$ )

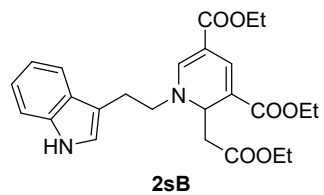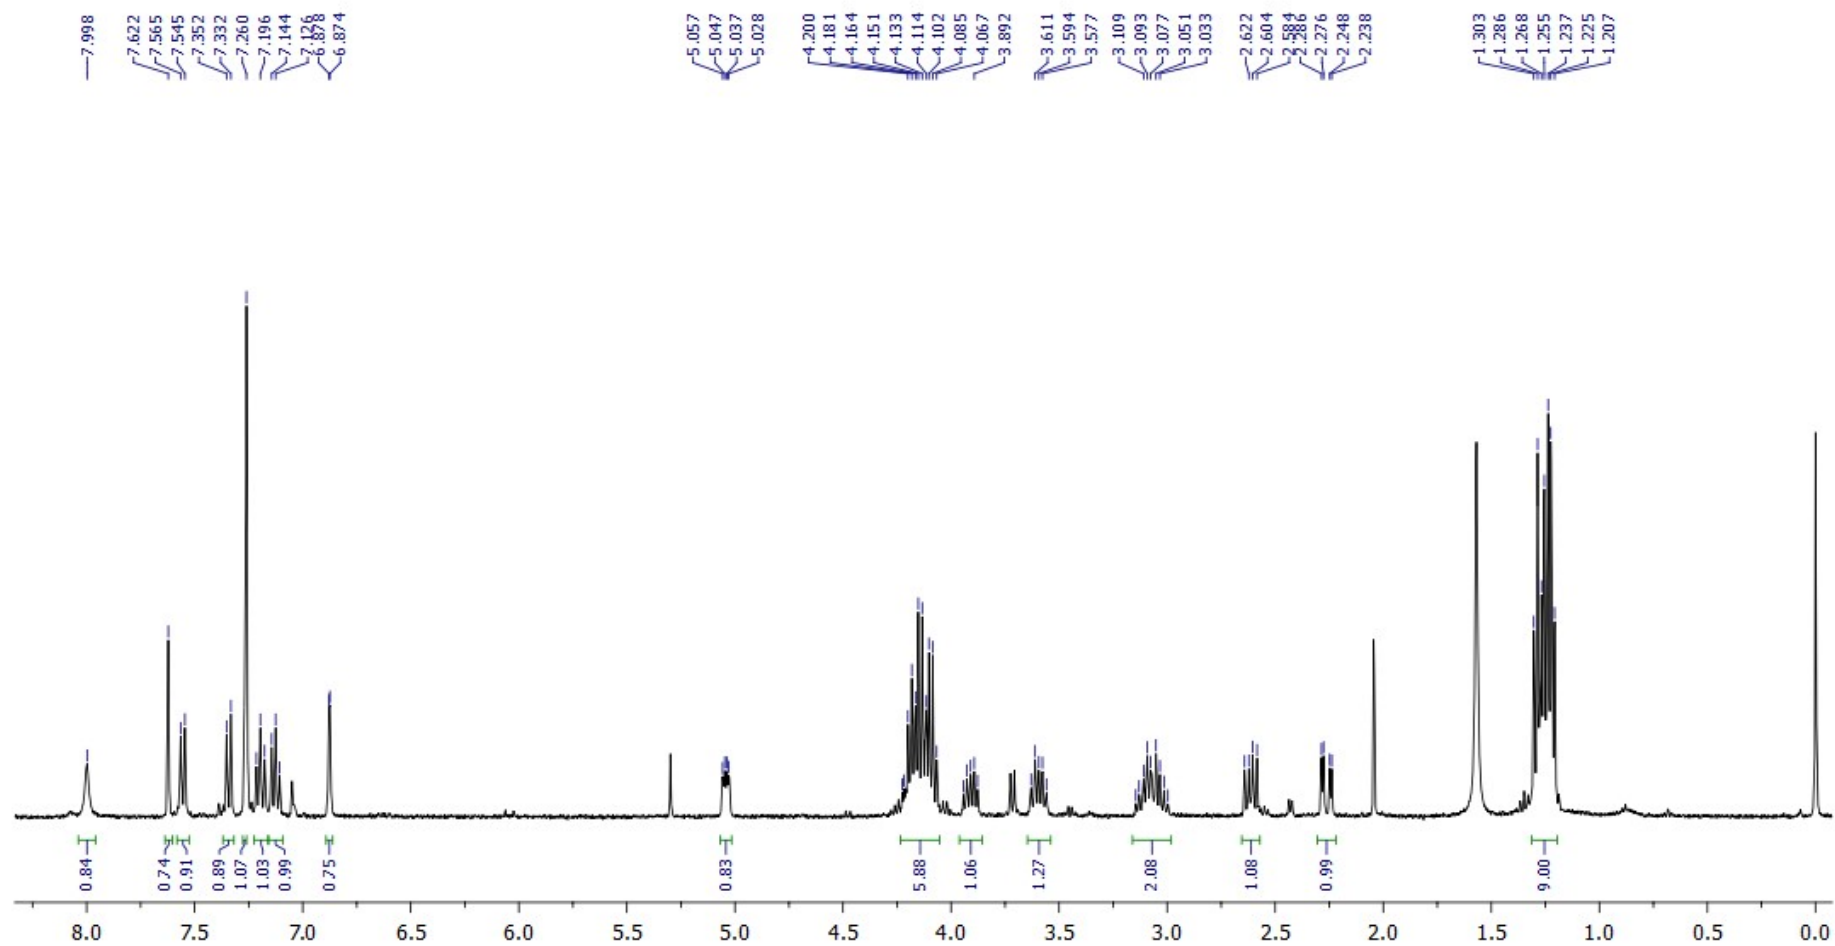

$^1\text{H NMR}$  (400.1 MHz,  $\text{CDCl}_3$ )

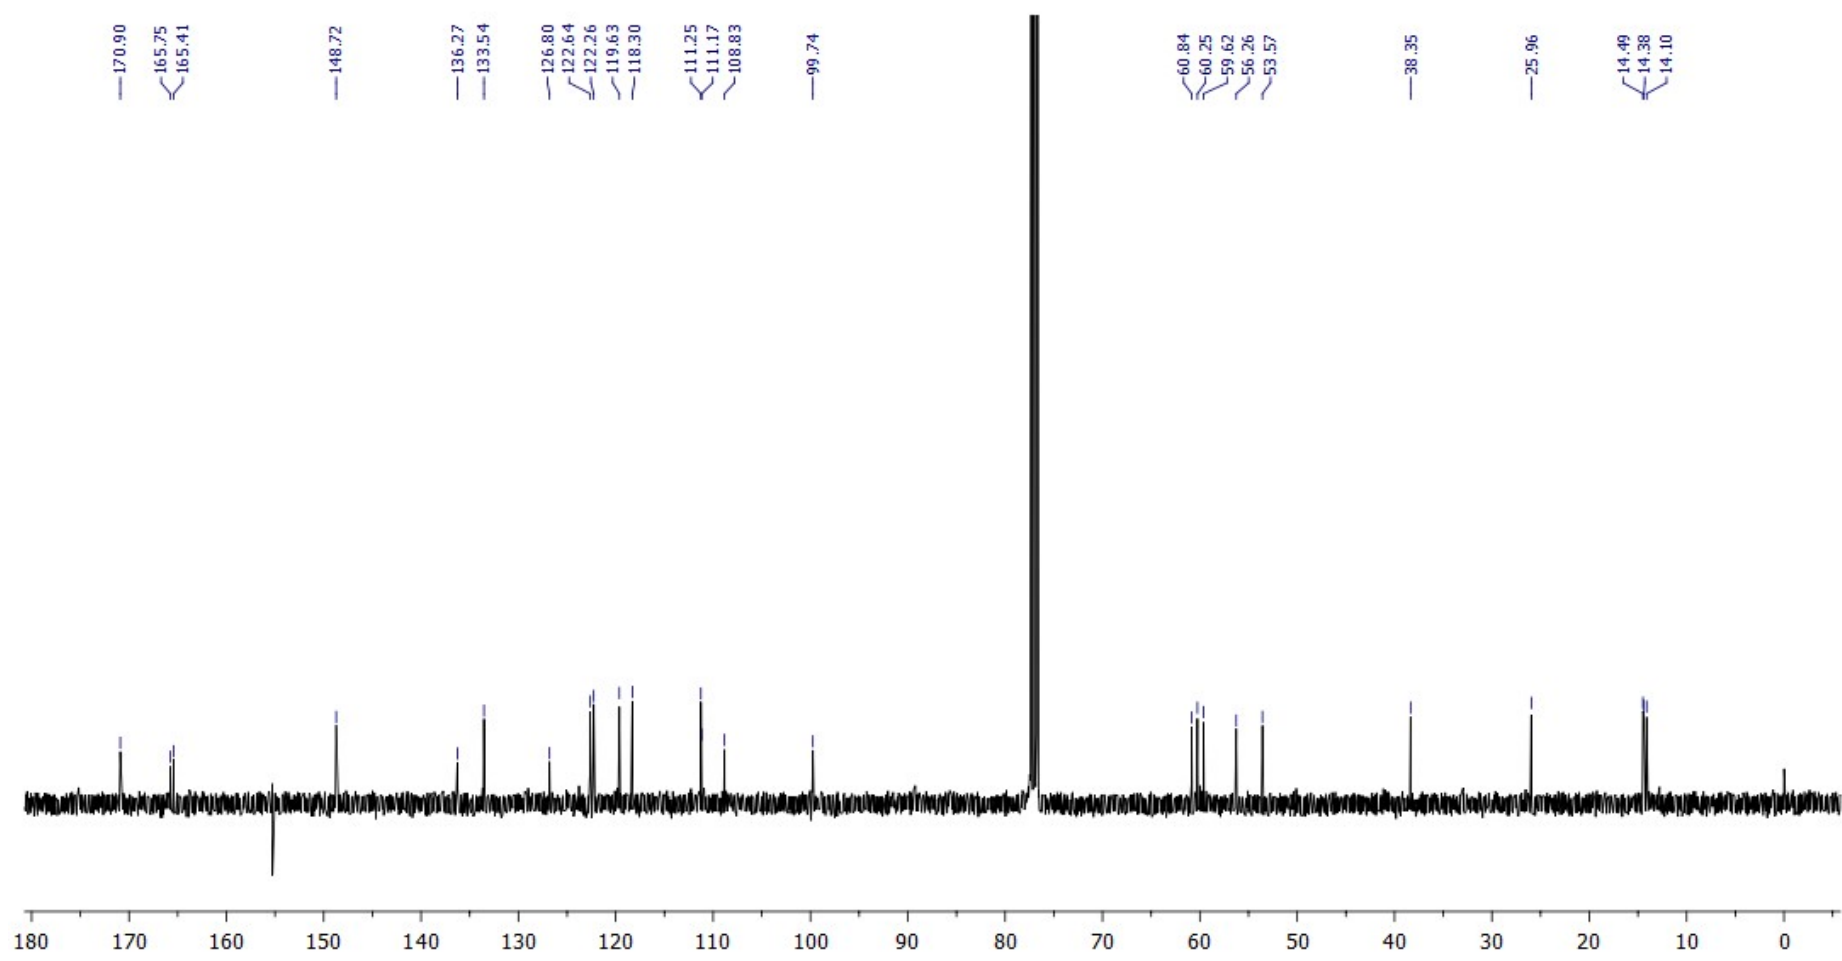

$^{13}\text{C}\{^1\text{H}\}$  NMR (100.6 MHz,  $\text{CDCl}_3$ )

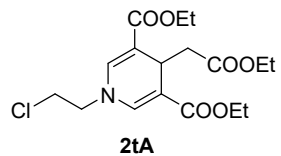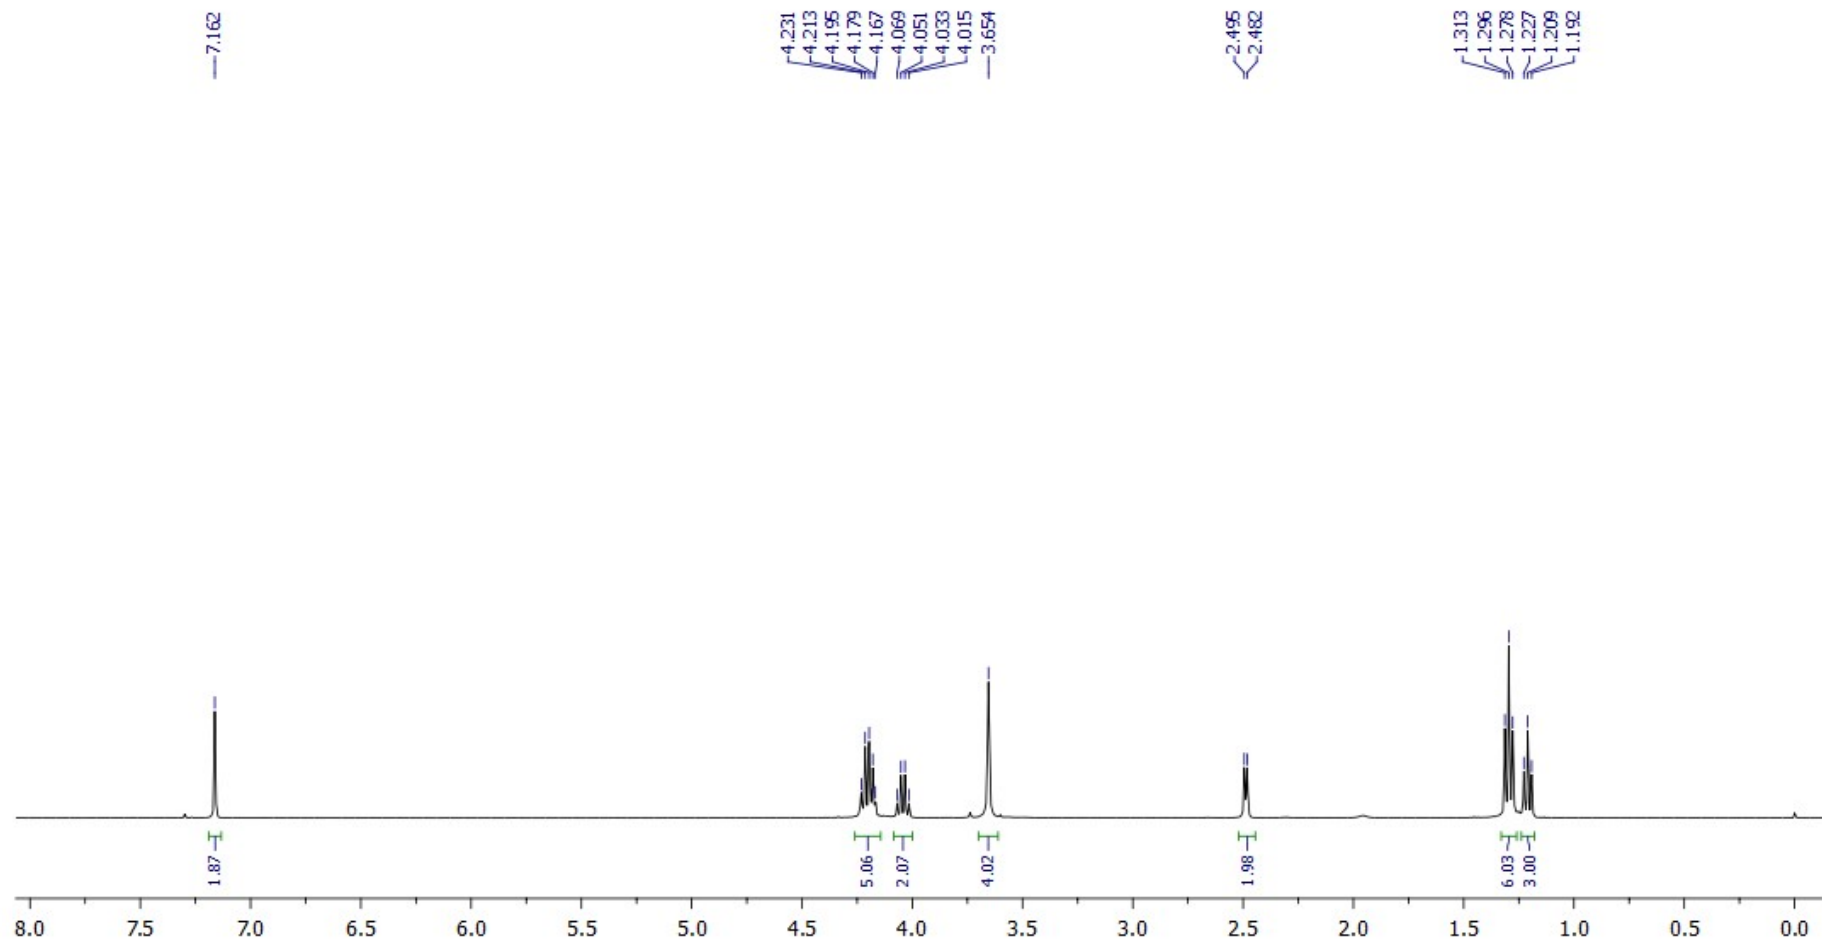

$^1\text{H NMR}$  (400.1 MHz,  $\text{CDCl}_3$ )

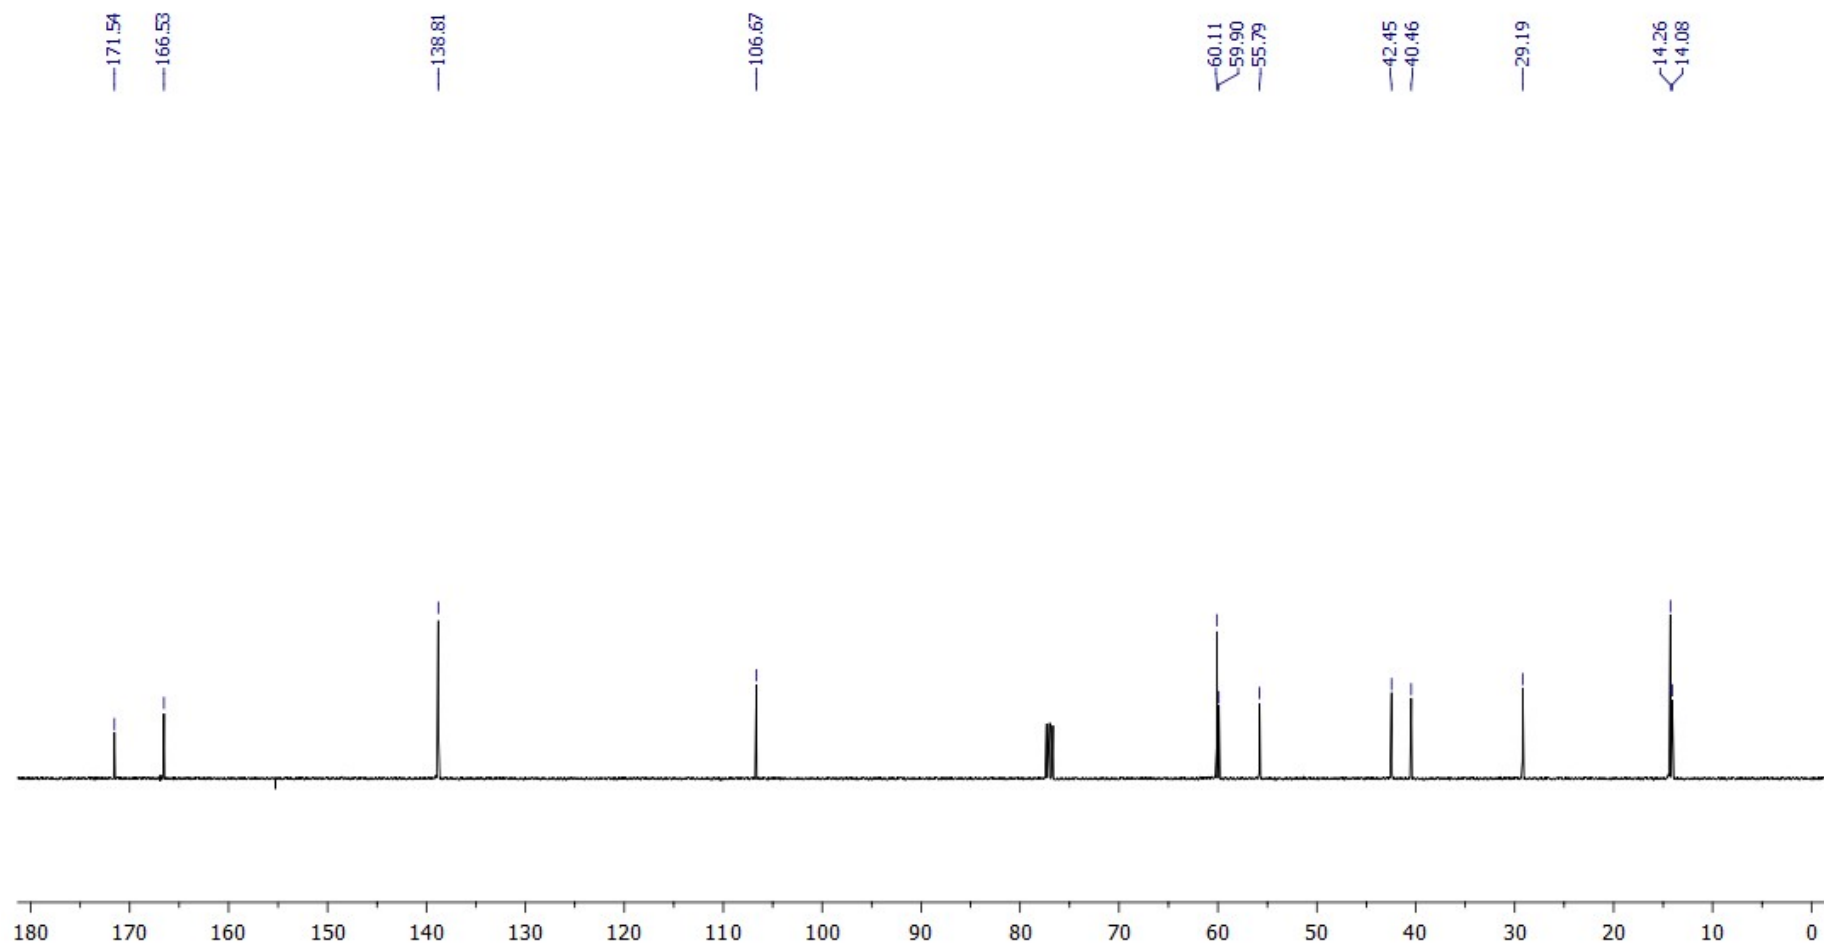

$^{13}\text{C}\{^1\text{H}\}$  NMR (100.6 MHz,  $\text{CDCl}_3$ )

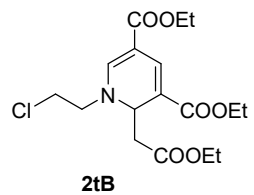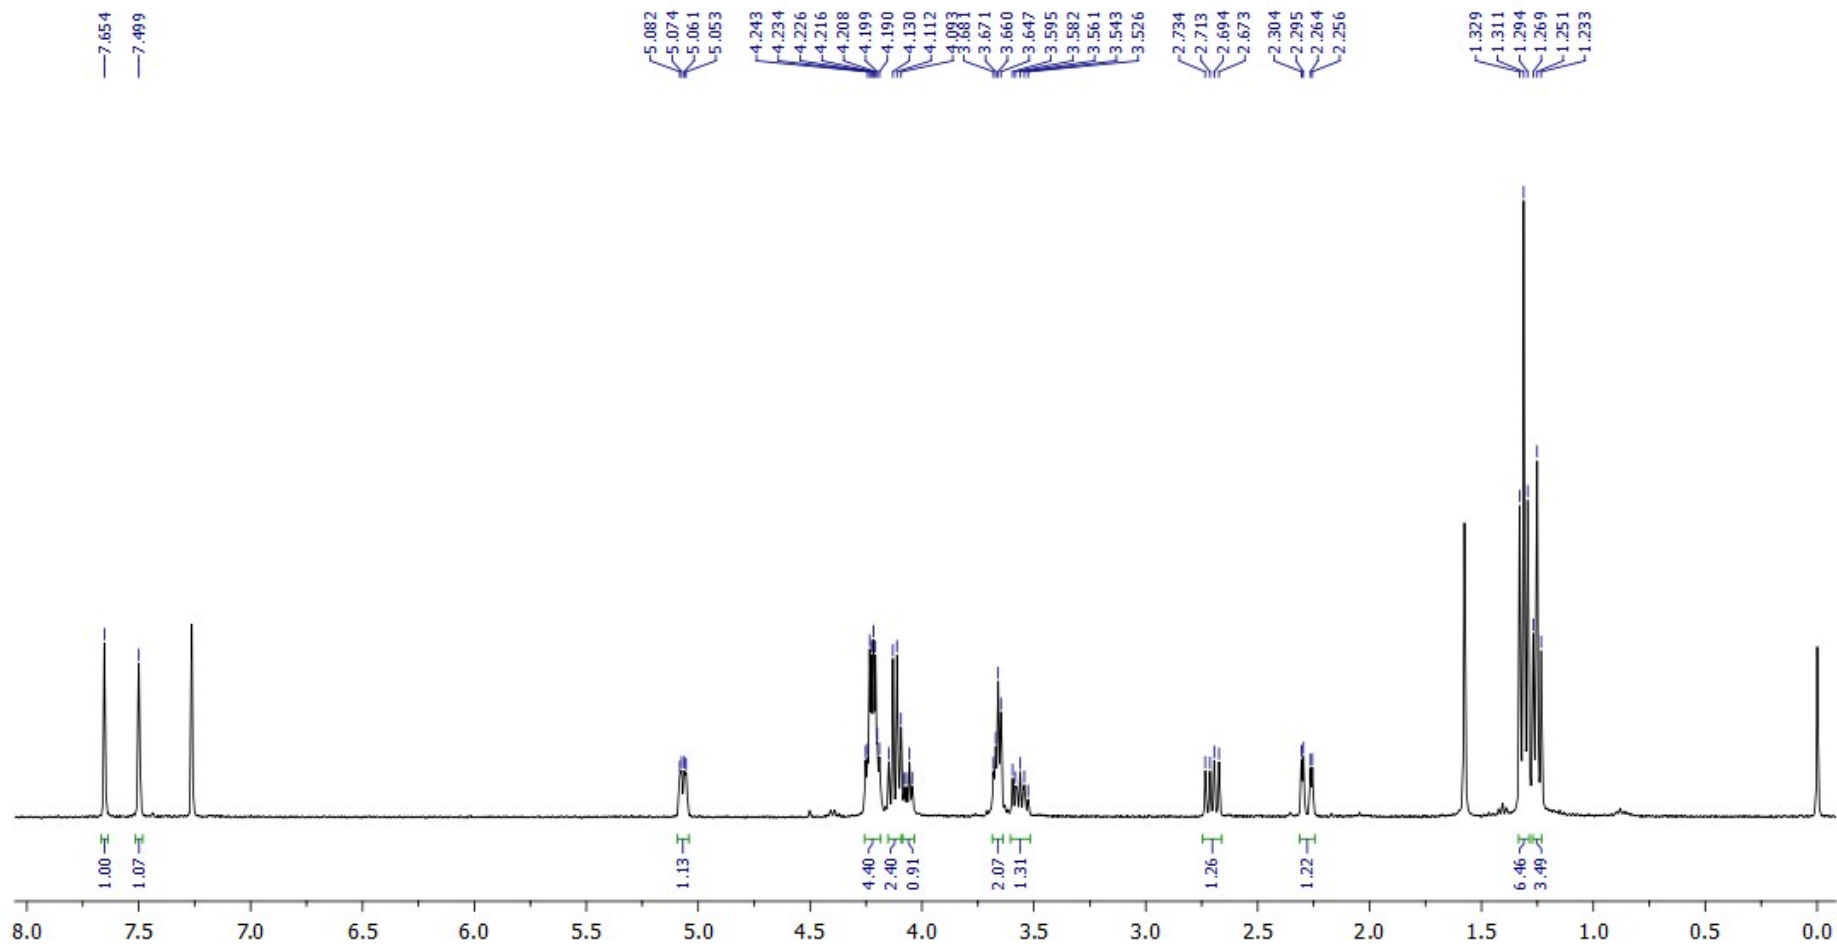

<sup>1</sup>H NMR (400.1 MHz, CDCl<sub>3</sub>)

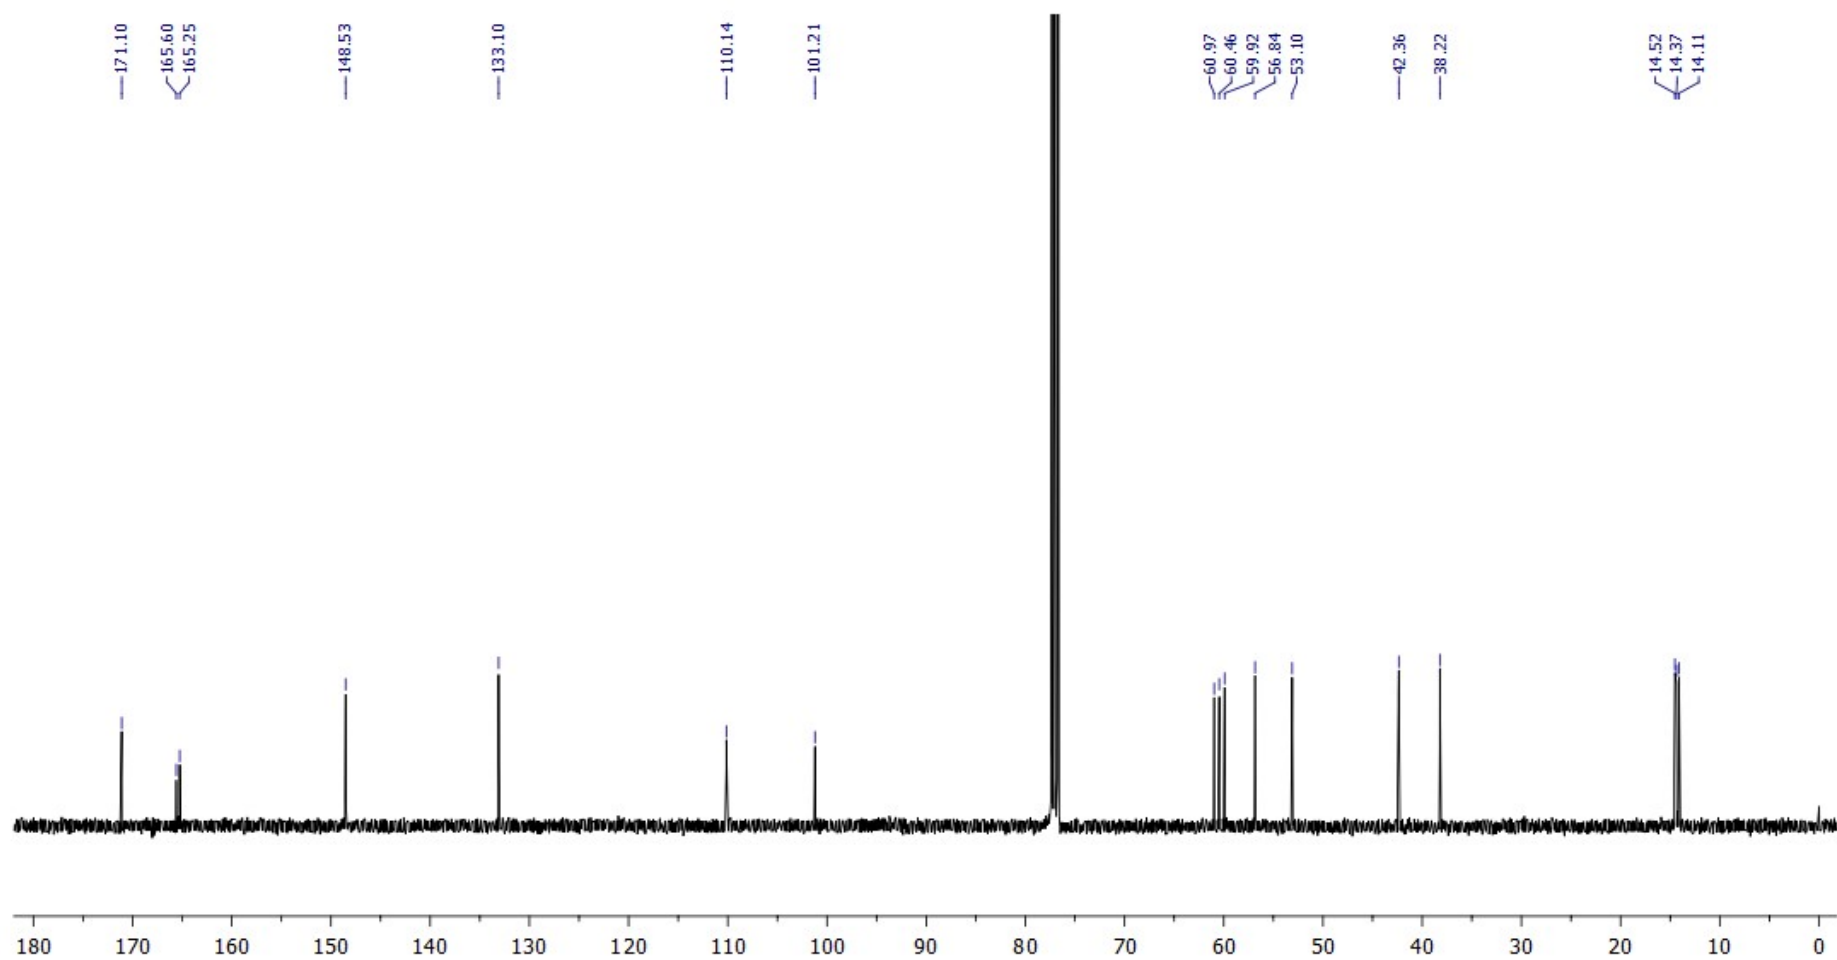

$^{13}\text{C}\{^1\text{H}\}$  NMR (100.6 MHz,  $\text{CDCl}_3$ )

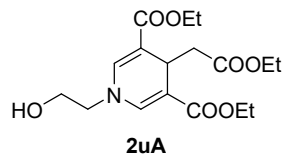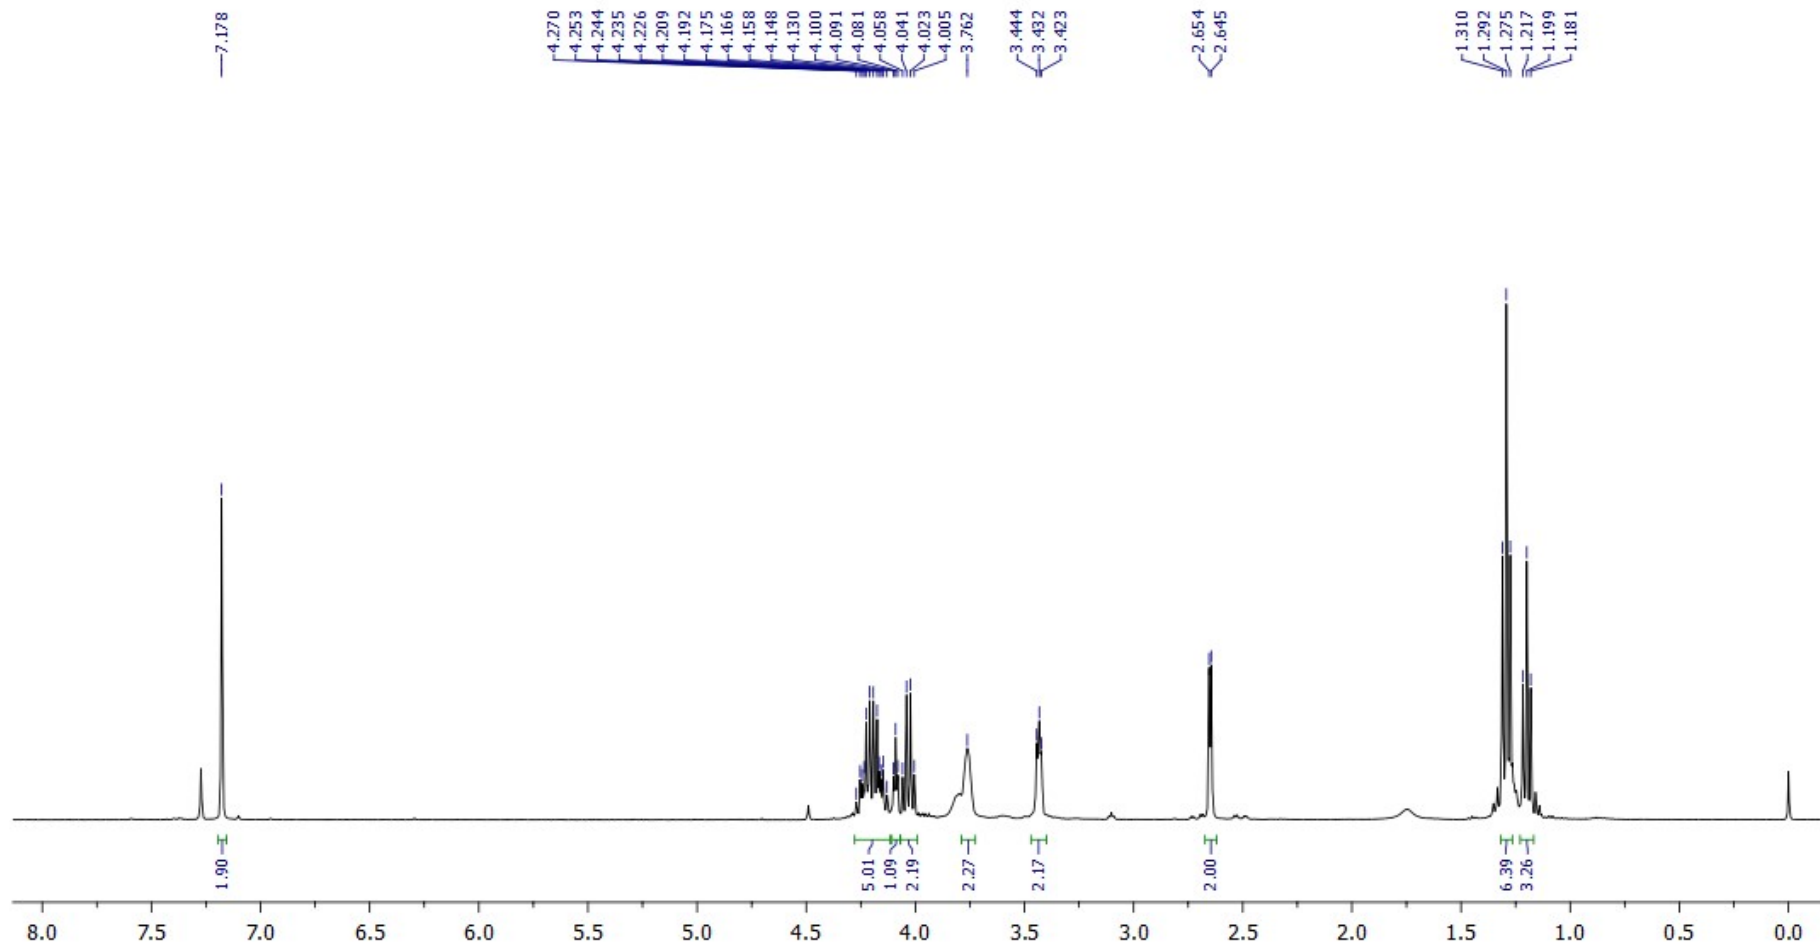

<sup>1</sup>H NMR (400.1 MHz, CDCl<sub>3</sub>)



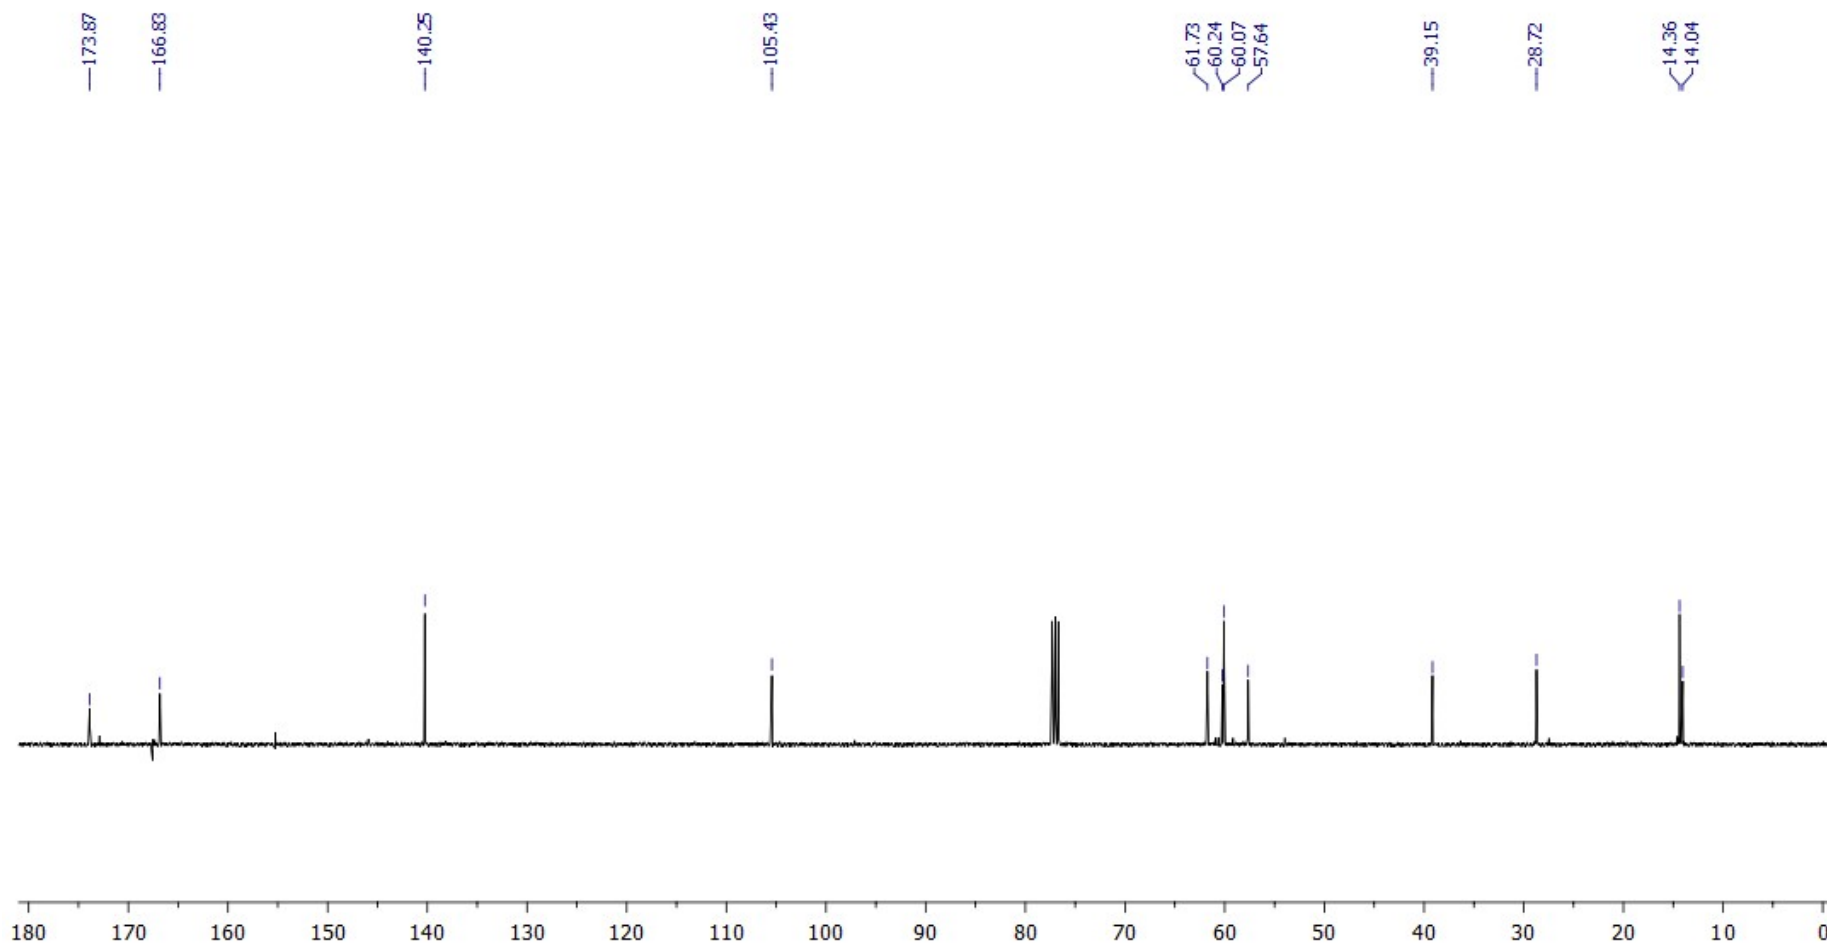

$^{13}\text{C}\{^1\text{H}\}$  NMR (100.6 MHz,  $\text{CDCl}_3$ )

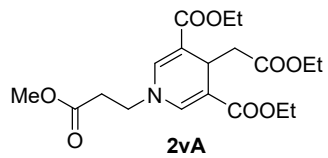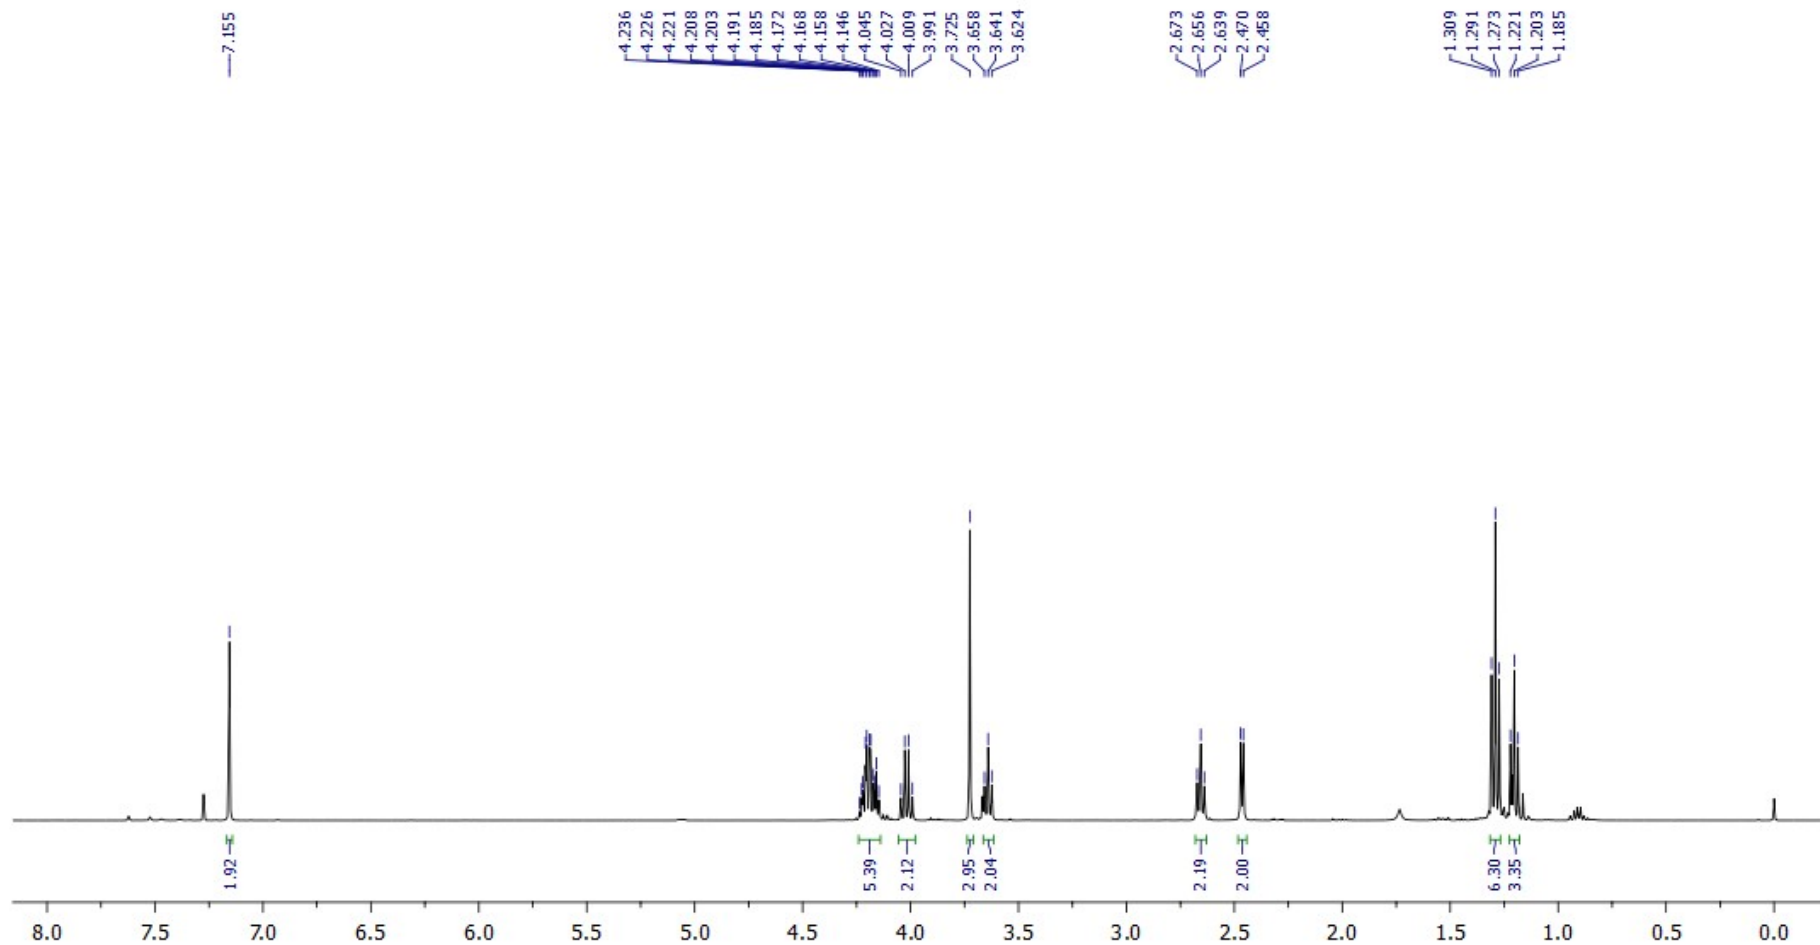

<sup>1</sup>H NMR (400.1 MHz, CDCl<sub>3</sub>)

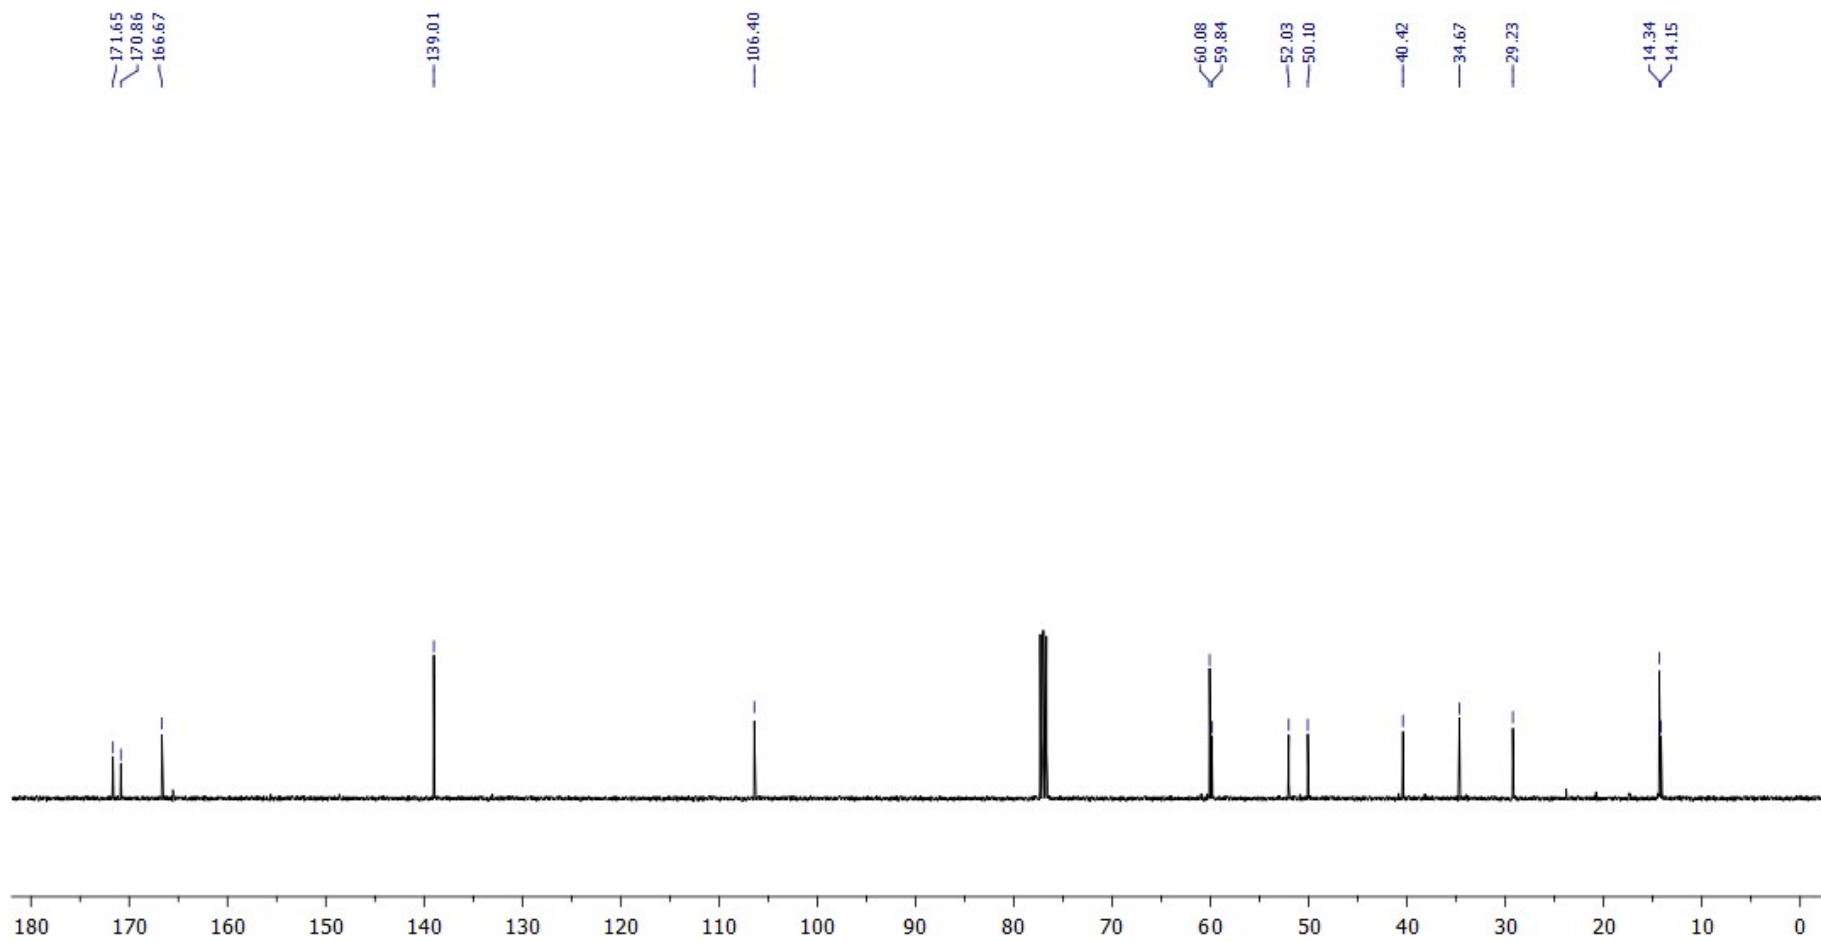

$^{13}\text{C}\{^1\text{H}\}$  NMR (100.6 MHz,  $\text{CDCl}_3$ )

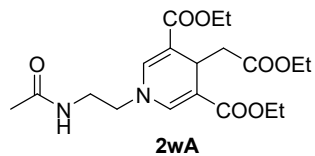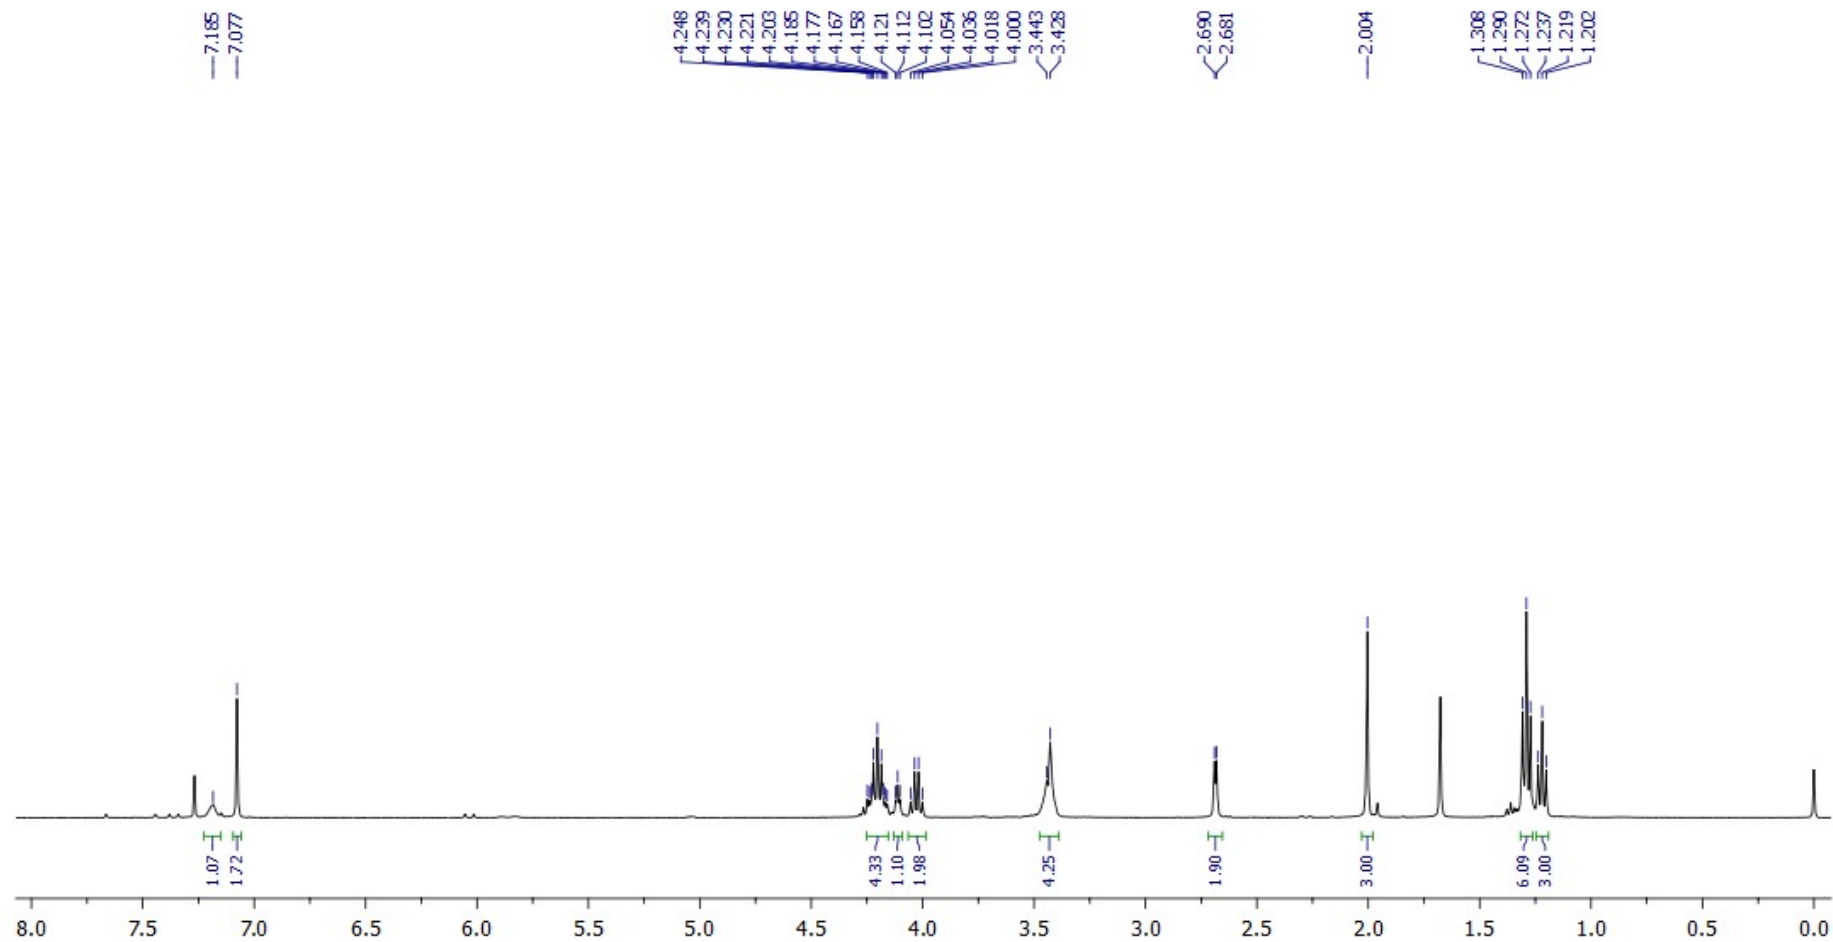

$^1\text{H NMR}$  (400.1 MHz,  $\text{CDCl}_3$ )

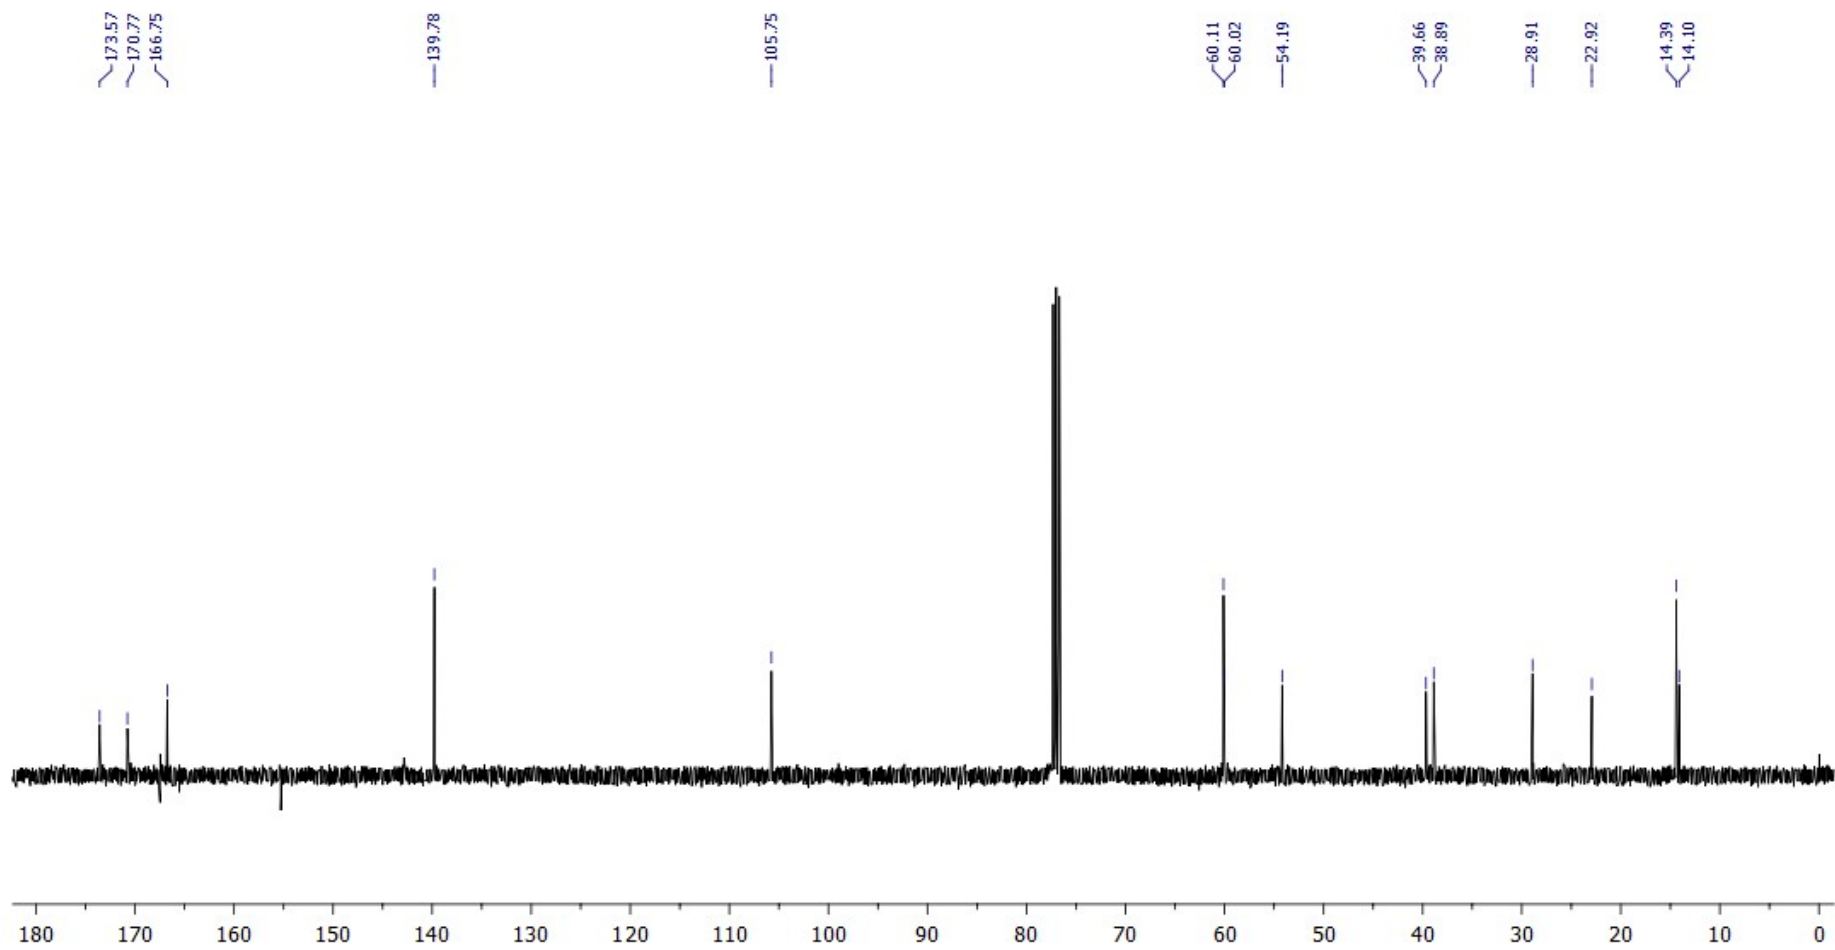

$^{13}\text{C}\{^1\text{H}\}$  NMR (100.6 MHz,  $\text{CDCl}_3$ )

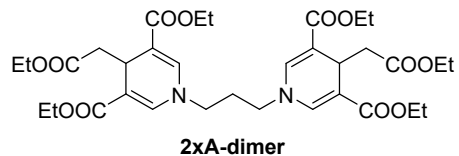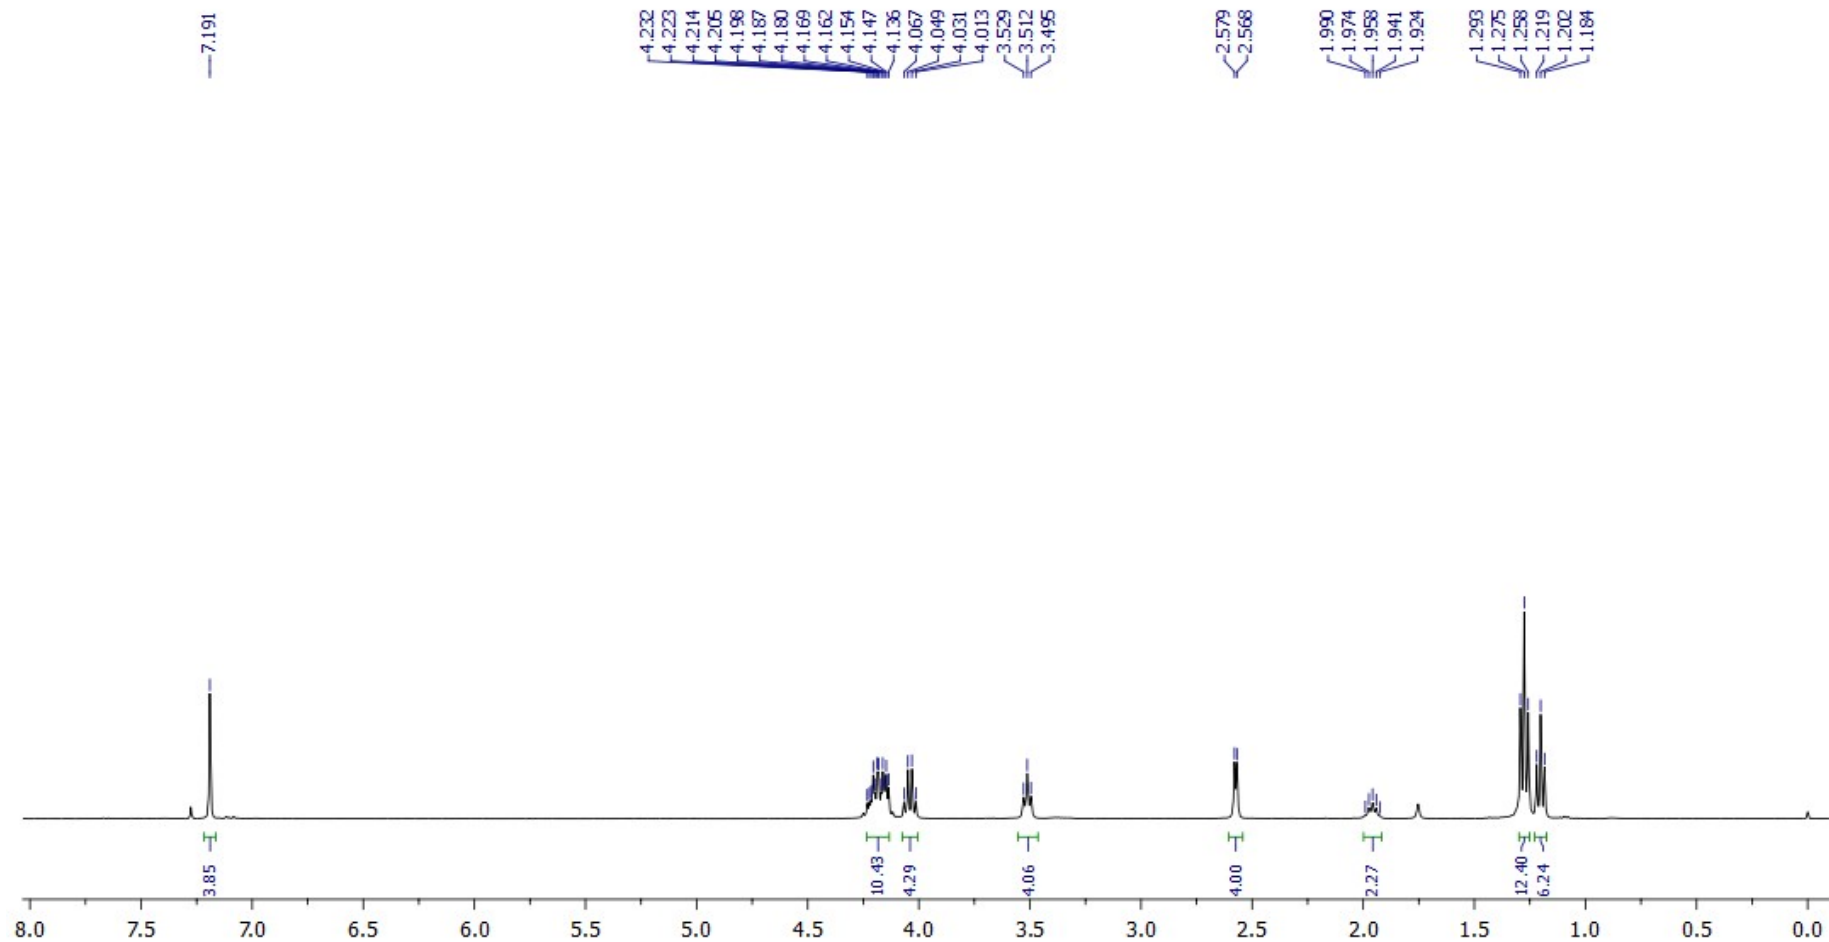

<sup>1</sup>H NMR (400.1 MHz, CDCl<sub>3</sub>)

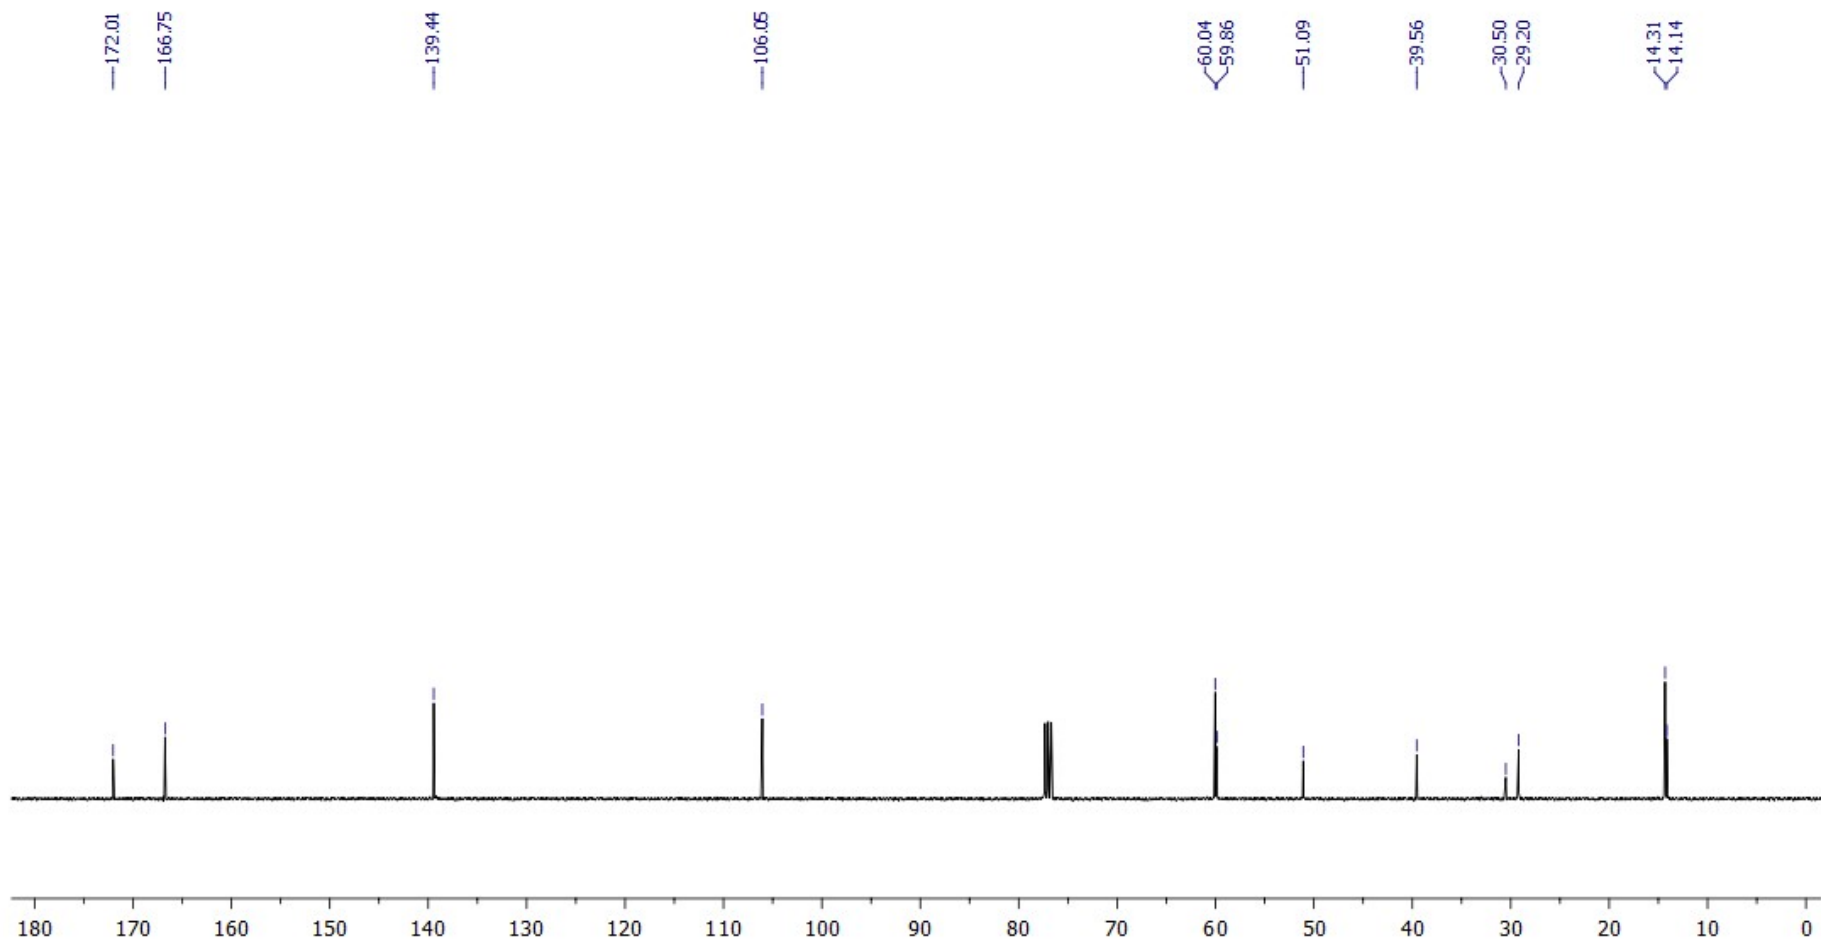

$^{13}\text{C}\{^1\text{H}\}$  NMR (100.6 MHz,  $\text{CDCl}_3$ )

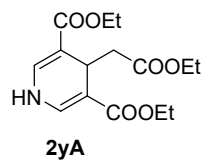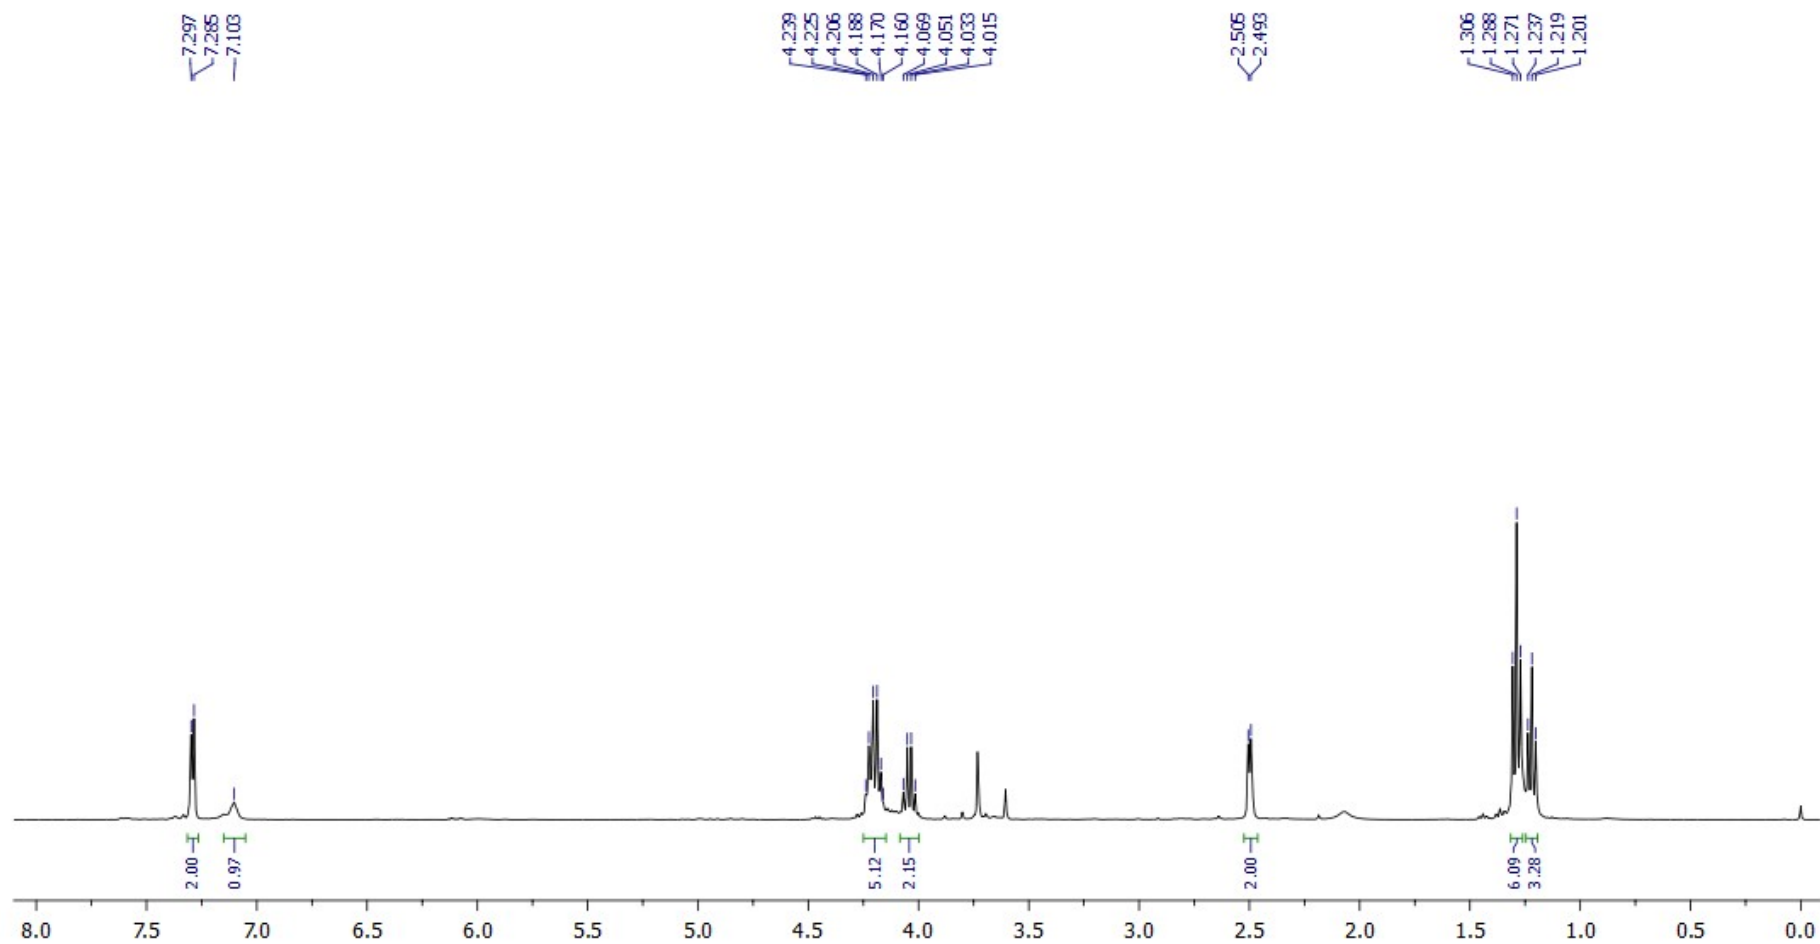

<sup>1</sup>H NMR (400.1 MHz, CDCl<sub>3</sub>)



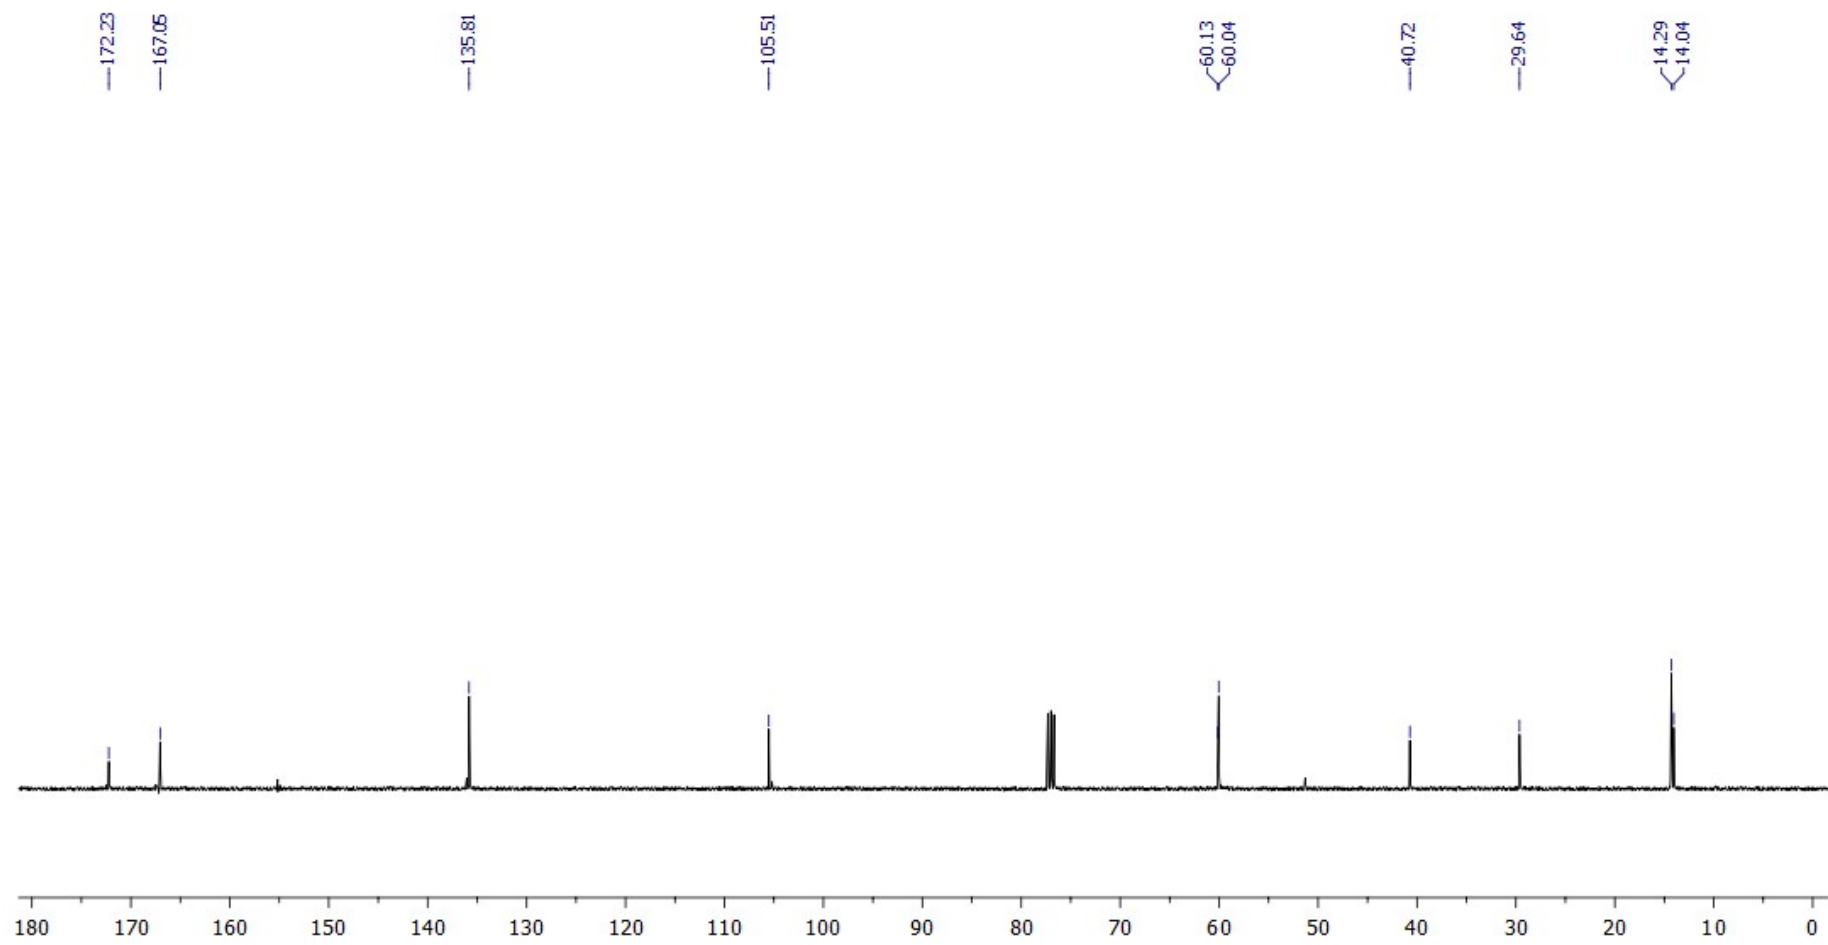

$^{13}\text{C}\{^1\text{H}\}$  NMR (100.6 MHz, CDCl<sub>3</sub>)

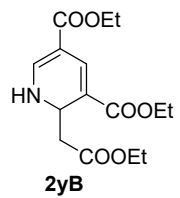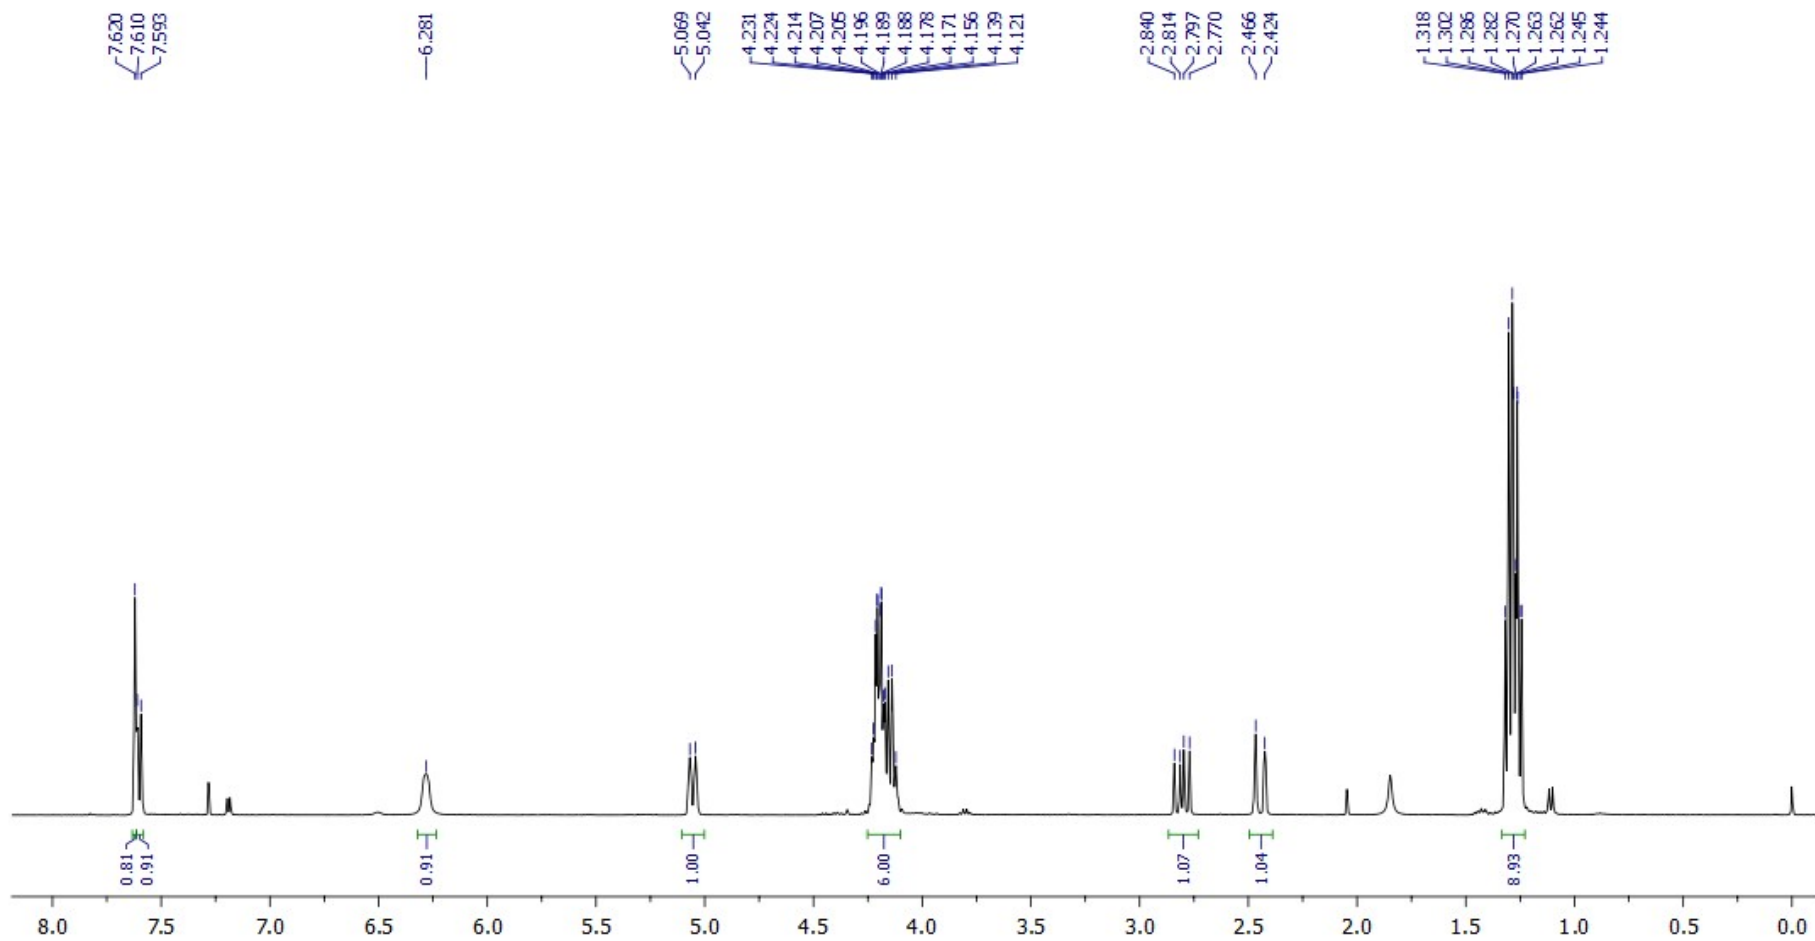

$^1\text{H}$  NMR (400.1 MHz,  $\text{CDCl}_3$ )

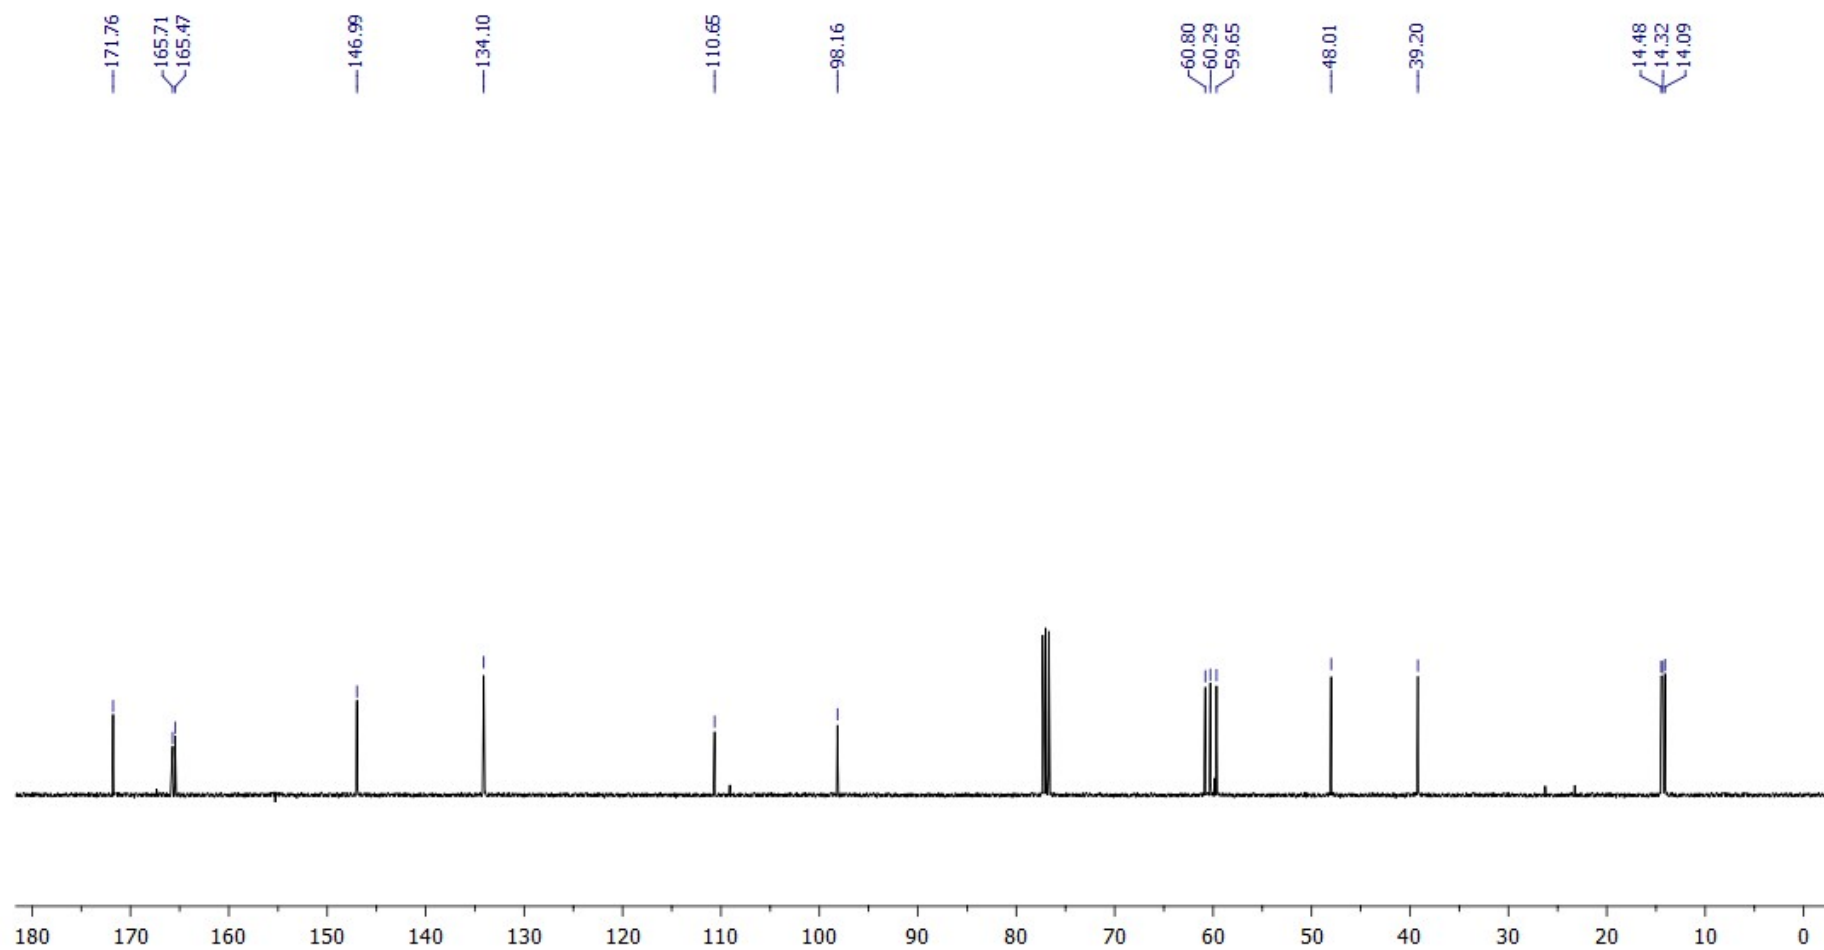

$^{13}\text{C}\{^1\text{H}\}$  NMR (100.6 MHz,  $\text{CDCl}_3$ )

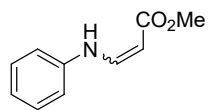

7a

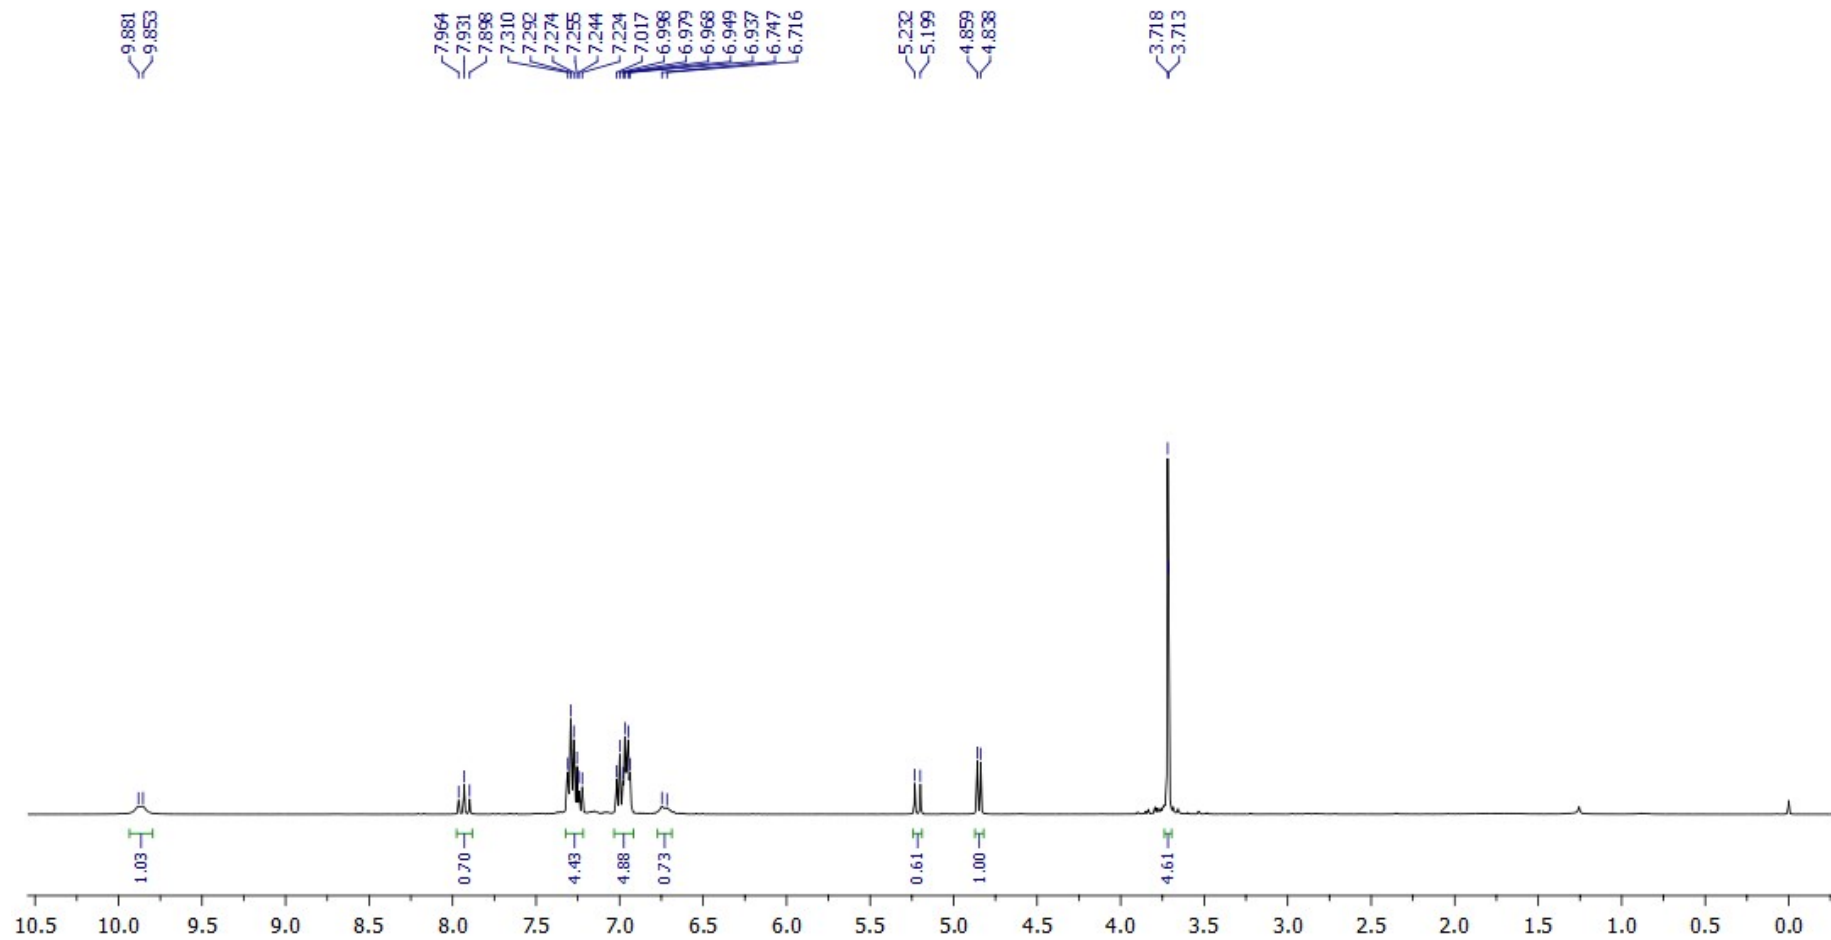

<sup>1</sup>H NMR (400.1 MHz, CDCl<sub>3</sub>)

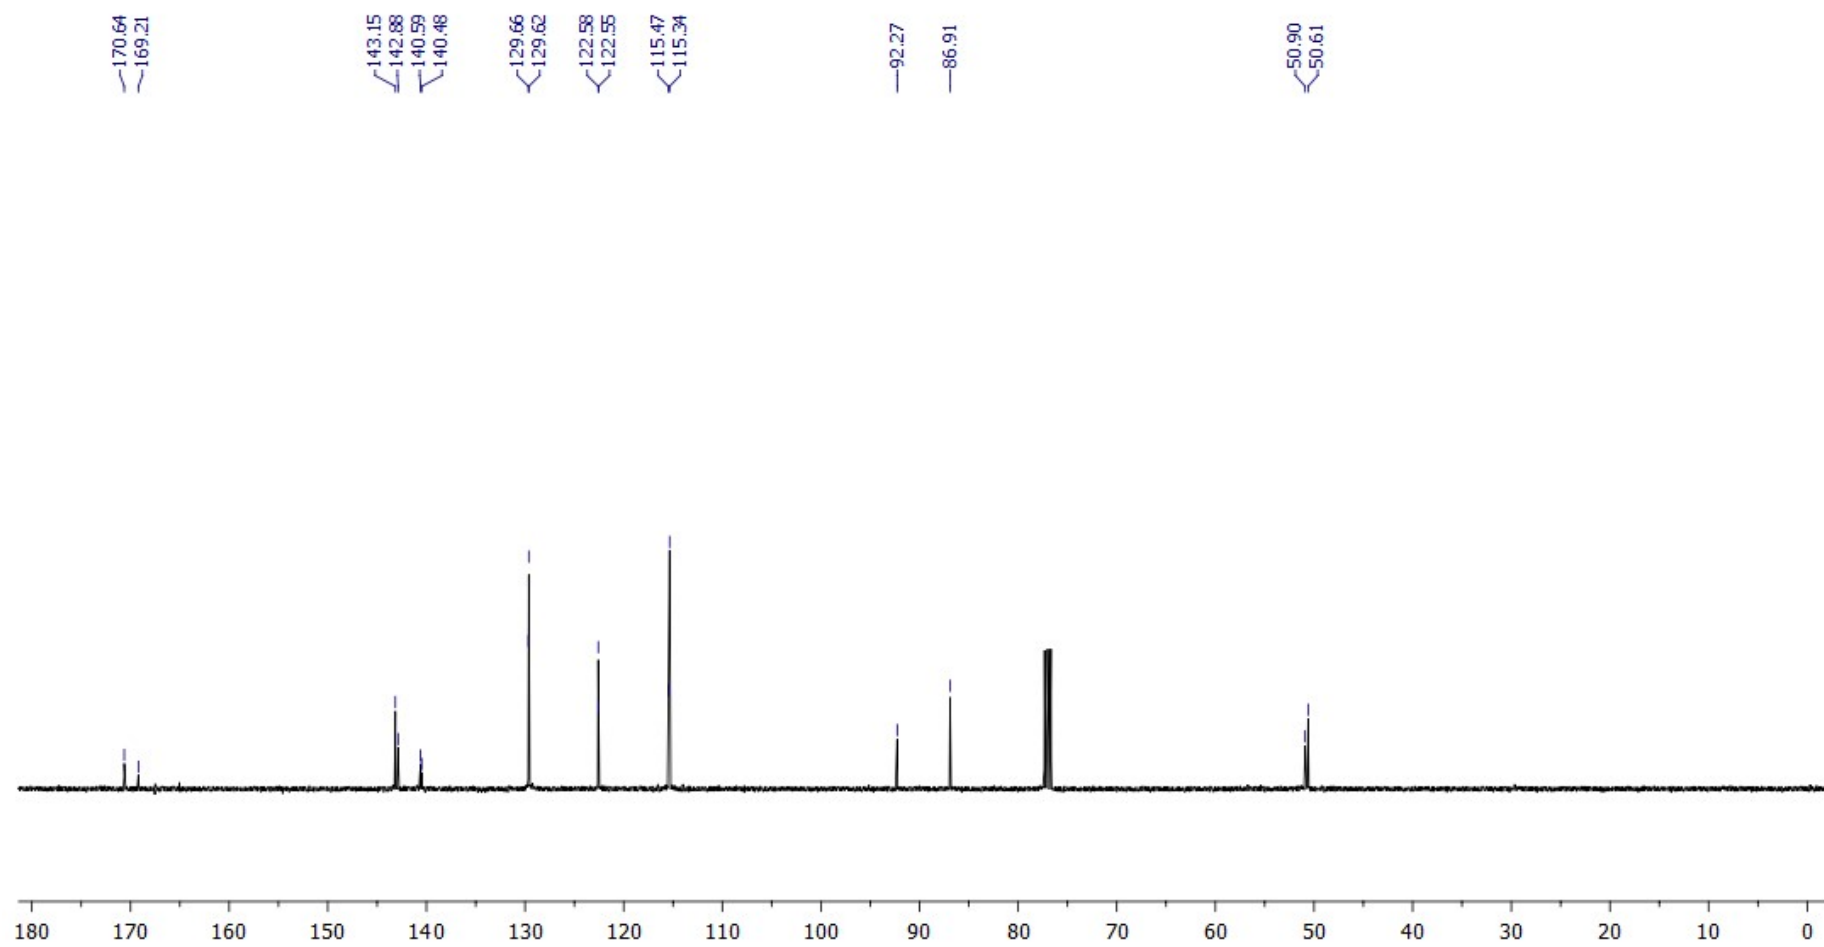

$^{13}\text{C}\{^1\text{H}\}$  NMR (100.6 MHz,  $\text{CDCl}_3$ )

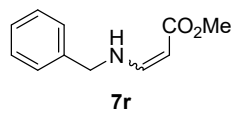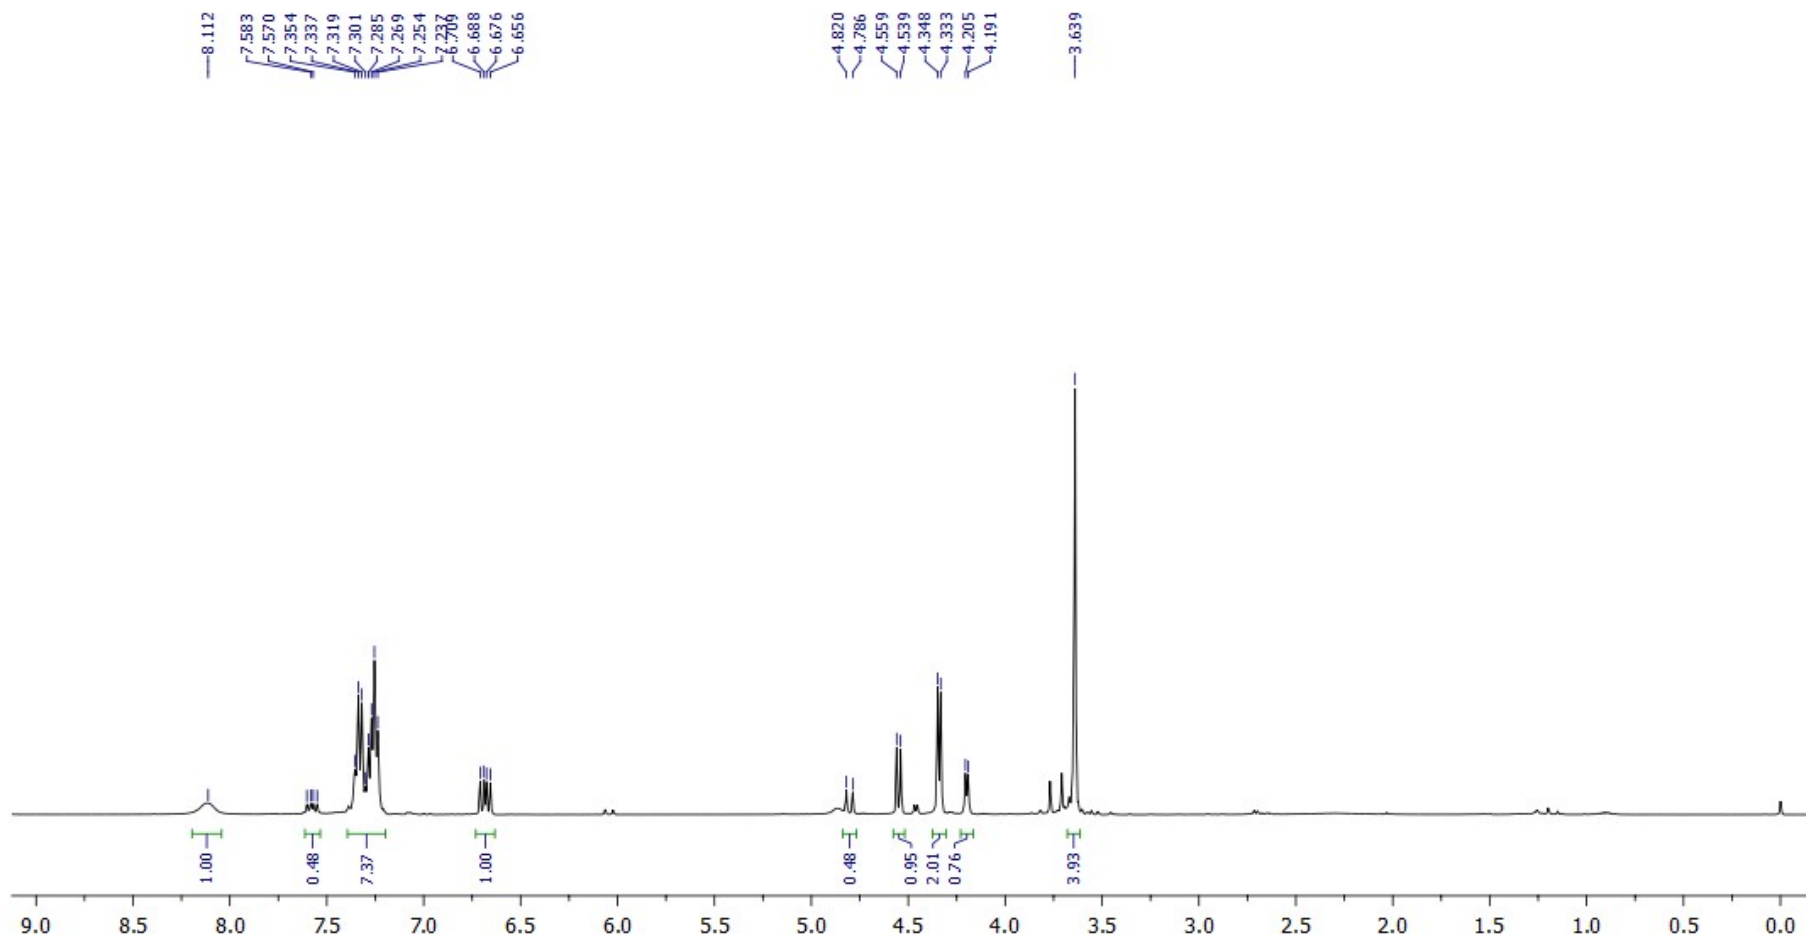

<sup>1</sup>H NMR (400.1 MHz, CDCl<sub>3</sub>)

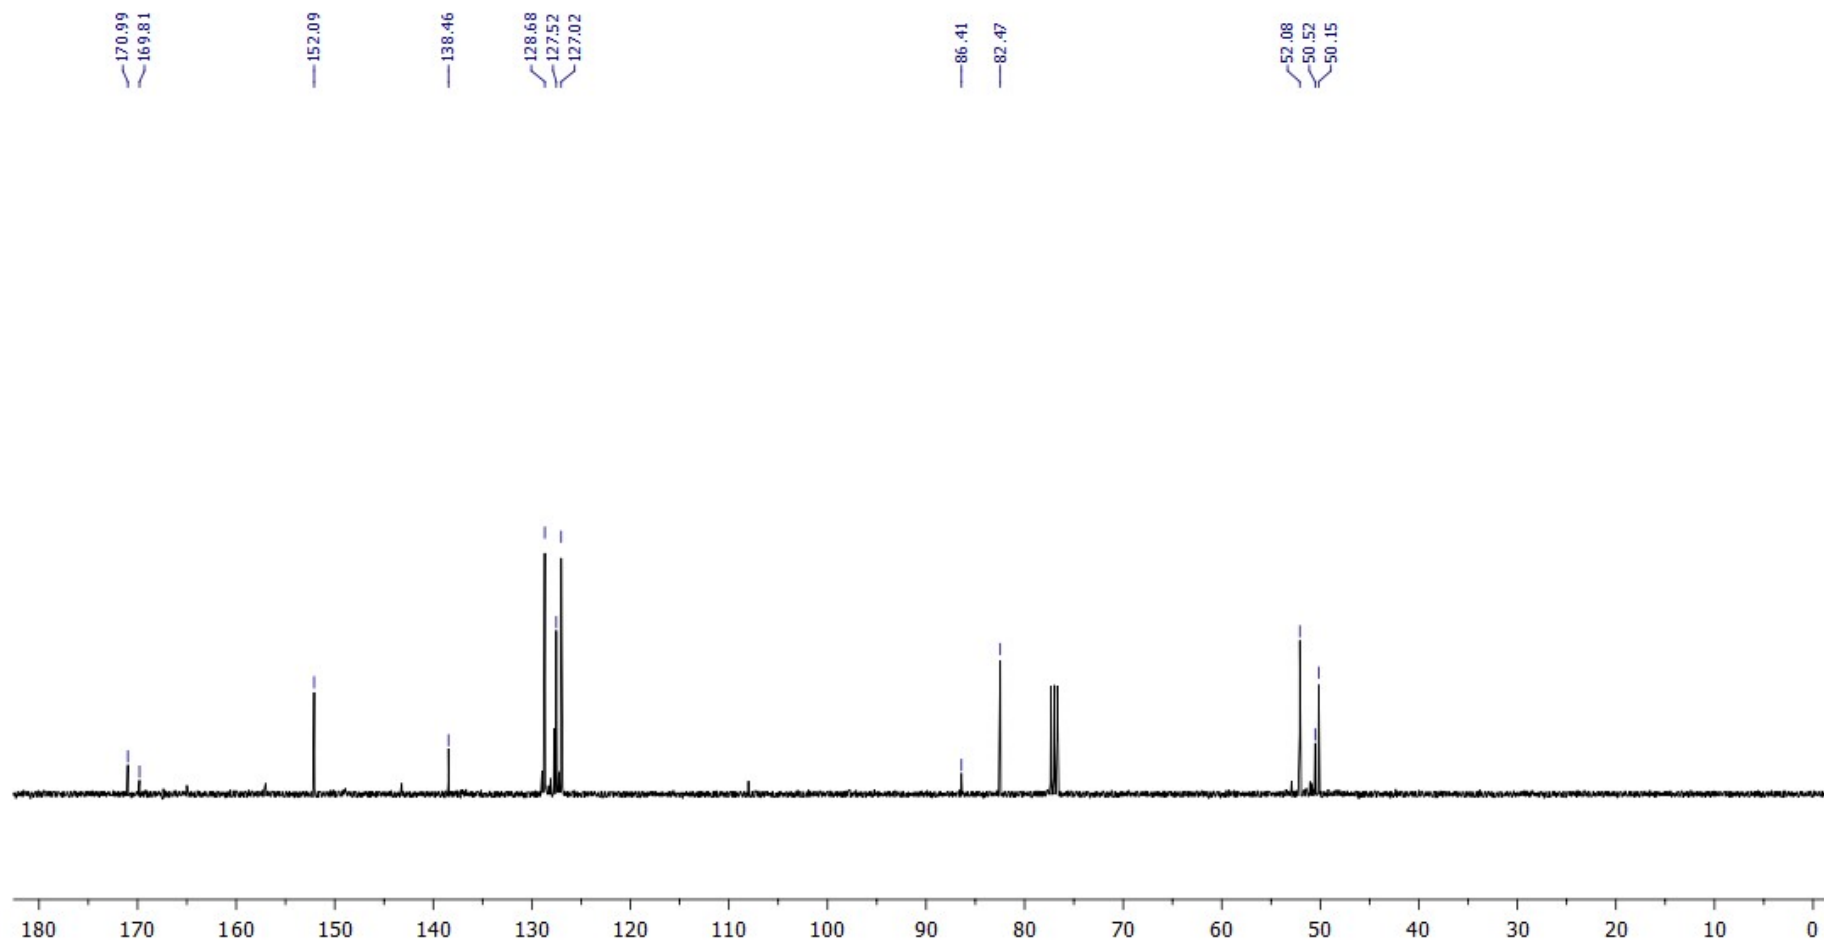

$^{13}\text{C}\{^1\text{H}\}$  NMR (100.6 MHz,  $\text{CDCl}_3$ )

**Absolute energies and x, y, z coordinates of optimized structures  
at the M062X/6-311+G(d,p) level of theory at 373.15 K**

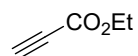

E = -344.4776471 a.u.

| Center Number | Atomic Number | Atomic Type | Coordinates (Angstroms) |           |           |
|---------------|---------------|-------------|-------------------------|-----------|-----------|
|               |               |             | X                       | Y         | Z         |
| 1             | 6             | 0           | -2.948330               | -0.923994 | 0.000108  |
| 2             | 1             | 0           | -3.873363               | -1.451074 | 0.000032  |
| 3             | 6             | 0           | -1.906935               | -0.332055 | 0.000039  |
| 4             | 6             | 0           | -0.671283               | 0.439867  | -0.000143 |
| 5             | 8             | 0           | -0.631536               | 1.638421  | 0.000166  |
| 6             | 8             | 0           | 0.395449                | -0.359511 | -0.000307 |
| 7             | 6             | 0           | 1.671157                | 0.309875  | -0.000115 |
| 8             | 1             | 0           | 1.725753                | 0.949657  | -0.883376 |
| 9             | 1             | 0           | 1.725423                | 0.949878  | 0.882994  |
| 10            | 6             | 0           | 2.736654                | -0.760721 | 0.000205  |
| 11            | 1             | 0           | 2.649742                | -1.391041 | -0.885660 |
| 12            | 1             | 0           | 3.724061                | -0.295916 | 0.000229  |
| 13            | 1             | 0           | 2.649504                | -1.390619 | 0.886345  |

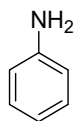

E = -287.553485 a.u.

| Center Number | Atomic Number | Atomic Type | Coordinates (Angstroms) |           |          |
|---------------|---------------|-------------|-------------------------|-----------|----------|
|               |               |             | X                       | Y         | Z        |
| 1             | 6             | 0           | -1.167566               | -1.198432 | 0.003674 |



|    |   |   |           |           |           |
|----|---|---|-----------|-----------|-----------|
| 2  | 6 | 0 | 0.220880  | -1.203898 | -0.005982 |
| 3  | 6 | 0 | 0.933095  | -0.000214 | -0.008759 |
| 4  | 6 | 0 | 0.220843  | 1.203707  | -0.005925 |
| 5  | 6 | 0 | -1.167444 | 1.198634  | 0.003652  |
| 6  | 6 | 0 | -1.874451 | 0.000038  | 0.008839  |
| 7  | 1 | 0 | -1.700925 | -2.142027 | 0.006935  |
| 8  | 1 | 0 | 0.763214  | -2.143538 | -0.016770 |
| 9  | 1 | 0 | 0.763486  | 2.143189  | -0.016507 |
| 10 | 1 | 0 | -1.700697 | 2.142281  | 0.006825  |
| 11 | 1 | 0 | -2.956848 | -0.000004 | 0.016594  |
| 12 | 7 | 0 | 2.327807  | 0.000039  | -0.074025 |
| 13 | 1 | 0 | 2.772139  | 0.836404  | 0.273566  |
| 14 | 1 | 0 | 2.772838  | -0.835589 | 0.274542  |

H<sub>3</sub>C-NH<sub>2</sub>

E = -95.8347391 a.u.

| Center<br>Number | Atomic<br>Number | Atomic<br>Type | Coordinates (Angstroms) |           |           |
|------------------|------------------|----------------|-------------------------|-----------|-----------|
|                  |                  |                | X                       | Y         | Z         |
| 1                | 6                | 0              | 0.048717                | 0.705715  | 0.000000  |
| 2                | 1                | 0              | 0.589451                | 1.062228  | 0.878310  |
| 3                | 1                | 0              | 0.589451                | 1.062228  | -0.878310 |
| 4                | 1                | 0              | -0.946469               | 1.168703  | 0.000000  |
| 5                | 7                | 0              | 0.048717                | -0.756055 | 0.000000  |
| 6                | 1                | 0              | -0.432880               | -1.117531 | 0.814524  |
| 7                | 1                | 0              | -0.432880               | -1.117531 | -0.814524 |

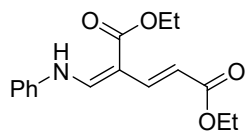

E = -976.6724635 a.u.

| Center<br>Number | Atomic<br>Number | Atomic<br>Type | Coordinates (Angstroms) |           |           |
|------------------|------------------|----------------|-------------------------|-----------|-----------|
|                  |                  |                | X                       | Y         | Z         |
| 1                | 6                | 0              | 1.062372                | -0.141258 | -0.007137 |
| 2                | 1                | 0              | 0.992710                | -1.222852 | -0.009710 |
| 3                | 6                | 0              | -0.118787               | 0.565258  | -0.007670 |
| 4                | 6                | 0              | -1.343067               | -0.219655 | -0.012835 |
| 5                | 1                | 0              | -1.170935               | -1.293635 | -0.005658 |
| 6                | 6                | 0              | -2.630351               | 0.161701  | -0.027166 |
| 7                | 1                | 0              | -2.947986               | 1.192312  | -0.038296 |
| 8                | 6                | 0              | -3.737512               | -0.810164 | -0.034080 |
| 9                | 6                | 0              | -0.050289               | 2.032420  | -0.001201 |
| 10               | 8                | 0              | -4.902535               | -0.496741 | -0.064560 |
| 11               | 8                | 0              | 0.989844                | 2.670036  | -0.001166 |
| 12               | 8                | 0              | -3.337538               | -2.099670 | -0.002401 |
| 13               | 8                | 0              | -1.240072               | 2.633615  | 0.007142  |
| 14               | 6                | 0              | -4.386728               | -3.074981 | -0.011029 |
| 15               | 1                | 0              | -5.054705               | -2.883674 | 0.831570  |
| 16               | 1                | 0              | -4.968883               | -2.959460 | -0.928327 |
| 17               | 6                | 0              | -3.736258               | -4.437180 | 0.078436  |
| 18               | 1                | 0              | -4.501367               | -5.215694 | 0.070265  |
| 19               | 1                | 0              | -3.067072               | -4.601302 | -0.767663 |
| 20               | 1                | 0              | -3.160521               | -4.527663 | 1.000941  |
| 21               | 6                | 0              | -1.231200               | 4.071697  | 0.020332  |
| 22               | 1                | 0              | -0.701118               | 4.425004  | -0.866435 |
| 23               | 1                | 0              | -0.677702               | 4.408249  | 0.899180  |
| 24               | 6                | 0              | -2.674232               | 4.521226  | 0.043724  |
| 25               | 1                | 0              | -3.181051               | 4.141403  | 0.931987  |
| 26               | 1                | 0              | -2.721558               | 5.611441  | 0.056782  |
| 27               | 1                | 0              | -3.204398               | 4.161854  | -0.839460 |
| 28               | 7                | 0              | 2.305703                | 0.359826  | -0.004348 |
| 29               | 1                | 0              | 2.359123                | 1.376264  | -0.003740 |

|    |   |   |          |           |           |
|----|---|---|----------|-----------|-----------|
| 30 | 6 | 0 | 3.509469 | -0.364253 | -0.002865 |
| 31 | 6 | 0 | 4.698153 | 0.371218  | -0.005789 |
| 32 | 6 | 0 | 3.568016 | -1.759179 | 0.001667  |
| 33 | 6 | 0 | 5.923944 | -0.276659 | -0.004526 |
| 34 | 1 | 0 | 4.651340 | 1.454817  | -0.009175 |
| 35 | 6 | 0 | 4.803073 | -2.396691 | 0.002564  |
| 36 | 1 | 0 | 2.668914 | -2.360935 | 0.004861  |
| 37 | 6 | 0 | 5.986069 | -1.666734 | -0.000496 |
| 38 | 1 | 0 | 6.834606 | 0.310258  | -0.006780 |
| 39 | 1 | 0 | 4.834710 | -3.479665 | 0.005996  |
| 40 | 1 | 0 | 6.942351 | -2.174015 | 0.000408  |

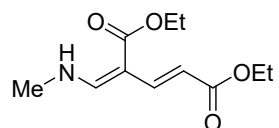

E = -784.9612451 a.u.

| Center Number | Atomic Number | Atomic Type | Coordinates (Angstroms) |           |           |
|---------------|---------------|-------------|-------------------------|-----------|-----------|
|               |               |             | X                       | Y         | Z         |
| 1             | 6             | 0           | 2.478031                | -1.521482 | 0.000004  |
| 2             | 1             | 0           | 2.142420                | -2.556348 | -0.000020 |
| 3             | 6             | 0           | 1.506610                | -0.538337 | 0.000014  |
| 4             | 6             | 0           | 0.129388                | -0.987657 | -0.000008 |
| 5             | 1             | 0           | 0.014962                | -2.071431 | -0.000056 |
| 6             | 6             | 0           | -1.029907               | -0.308411 | 0.000022  |
| 7             | 1             | 0           | -1.103245               | 0.767099  | 0.000071  |
| 8             | 6             | 0           | -2.283753               | -1.079604 | -0.000026 |
| 9             | 6             | 0           | 1.944952                | 0.856264  | 0.000034  |
| 10            | 8             | 0           | -2.387724               | -2.283780 | -0.000110 |
| 11            | 8             | 0           | 3.113476                | 1.211934  | 0.000061  |
| 12            | 8             | 0           | -3.357223               | -0.262325 | 0.000033  |
| 13            | 8             | 0           | 0.944395                | 1.743035  | 0.000010  |

|    |   |   |           |           |           |
|----|---|---|-----------|-----------|-----------|
| 14 | 6 | 0 | -4.633158 | -0.912178 | -0.000055 |
| 15 | 1 | 0 | -4.702780 | -1.553811 | -0.881632 |
| 16 | 1 | 0 | -4.702768 | -1.554087 | 0.881322  |
| 17 | 6 | 0 | -5.690385 | 0.168846  | 0.000124  |
| 18 | 1 | 0 | -6.684305 | -0.282664 | -0.000001 |
| 19 | 1 | 0 | -5.596010 | 0.798991  | 0.885842  |
| 20 | 1 | 0 | -5.595949 | 0.799349  | -0.885333 |
| 21 | 6 | 0 | 1.316934  | 3.129132  | 0.000000  |
| 22 | 1 | 0 | 1.927610  | 3.329962  | -0.882715 |
| 23 | 1 | 0 | 1.927491  | 3.330006  | 0.882788  |
| 24 | 6 | 0 | 0.032494  | 3.927315  | -0.000105 |
| 25 | 1 | 0 | -0.561618 | 3.696929  | 0.885658  |
| 26 | 1 | 0 | 0.257480  | 4.995242  | -0.000122 |
| 27 | 1 | 0 | -0.561503 | 3.696878  | -0.885933 |
| 28 | 7 | 0 | 3.798916  | -1.367187 | 0.000019  |
| 29 | 1 | 0 | 4.133506  | -0.407891 | 0.000041  |
| 30 | 6 | 0 | 4.740205  | -2.468243 | 0.000000  |
| 31 | 1 | 0 | 5.374440  | -2.436299 | -0.888198 |
| 32 | 1 | 0 | 5.374383  | -2.436385 | 0.888242  |
| 33 | 1 | 0 | 4.191609  | -3.410011 | -0.000065 |

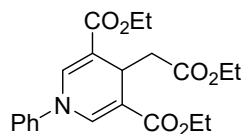

E = -1321.2537305 a.u.

| Center Number | Atomic Number | Atomic Type | Coordinates (Angstroms) |           |           |
|---------------|---------------|-------------|-------------------------|-----------|-----------|
|               |               |             | X                       | Y         | Z         |
| 1             | 6             | 0           | -1.166877               | 0.865172  | -0.552527 |
| 2             | 6             | 0           | -1.200649               | -0.373564 | -1.069681 |
| 3             | 6             | 0           | 0.031225                | -1.245432 | -1.160194 |
| 4             | 6             | 0           | 1.258429                | -0.372826 | -1.014217 |
| 5             | 6             | 0           | 1.203460                | 0.867357  | -0.500457 |
| 6             | 7             | 0           | 0.010839                | 1.483329  | -0.182581 |

|    |   |   |           |           |           |
|----|---|---|-----------|-----------|-----------|
| 7  | 1 | 0 | -2.061778 | 1.464852  | -0.450203 |
| 8  | 1 | 0 | 2.099318  | 1.443168  | -0.312407 |
| 9  | 6 | 0 | 0.009493  | -2.403226 | -0.145751 |
| 10 | 1 | 0 | -0.860240 | -3.038475 | -0.336010 |
| 11 | 1 | 0 | 0.890304  | -3.034757 | -0.287879 |
| 12 | 6 | 0 | -0.034496 | -1.979085 | 1.300694  |
| 13 | 6 | 0 | 2.549211  | -0.957918 | -1.410128 |
| 14 | 6 | 0 | -2.467570 | -0.948401 | -1.547949 |
| 15 | 8 | 0 | 2.669311  | -2.077787 | -1.847760 |
| 16 | 8 | 0 | -2.565317 | -2.063483 | -2.003338 |
| 17 | 8 | 0 | -0.087075 | -0.851431 | 1.719640  |
| 18 | 8 | 0 | 3.598064  | -0.127304 | -1.245080 |
| 19 | 8 | 0 | -0.011570 | -3.051729 | 2.108833  |
| 20 | 8 | 0 | -3.522132 | -0.117623 | -1.429843 |
| 21 | 6 | 0 | -4.781946 | -0.646229 | -1.866569 |
| 22 | 1 | 0 | -4.698435 | -0.933912 | -2.916786 |
| 23 | 1 | 0 | -5.004914 | -1.547757 | -1.291518 |
| 24 | 6 | 0 | -5.819465 | 0.433253  | -1.655028 |
| 25 | 1 | 0 | -6.798116 | 0.075360  | -1.979693 |
| 26 | 1 | 0 | -5.882452 | 0.706045  | -0.600442 |
| 27 | 1 | 0 | -5.568435 | 1.325281  | -2.230953 |
| 28 | 6 | 0 | 4.878018  | -0.663273 | -1.608304 |
| 29 | 1 | 0 | 5.070676  | -1.555801 | -1.008722 |
| 30 | 1 | 0 | 4.847762  | -0.967438 | -2.656767 |
| 31 | 6 | 0 | 5.904662  | 0.418851  | -1.360857 |
| 32 | 1 | 0 | 6.898184  | 0.055991  | -1.629999 |
| 33 | 1 | 0 | 5.684105  | 1.301924  | -1.962651 |
| 34 | 1 | 0 | 5.914497  | 0.707749  | -0.308674 |
| 35 | 6 | 0 | -0.050414 | -2.781377 | 3.517468  |
| 36 | 1 | 0 | 0.808950  | -2.160202 | 3.779868  |
| 37 | 1 | 0 | -0.954489 | -2.210938 | 3.742171  |
| 38 | 6 | 0 | -0.027592 | -4.113557 | 4.231836  |
| 39 | 1 | 0 | -0.049945 | -3.956190 | 5.311705  |
| 40 | 1 | 0 | -0.892857 | -4.715317 | 3.950115  |
| 41 | 1 | 0 | 0.877079  | -4.668703 | 3.980064  |
| 42 | 1 | 0 | 0.051904  | -1.727386 | -2.142344 |
| 43 | 6 | 0 | -0.018153 | 2.716598  | 0.524141  |

|    |   |   |           |          |           |
|----|---|---|-----------|----------|-----------|
| 44 | 6 | 0 | 0.827367  | 3.763429 | 0.161138  |
| 45 | 6 | 0 | -0.908582 | 2.869131 | 1.584913  |
| 46 | 6 | 0 | 0.779625  | 4.960123 | 0.865790  |
| 47 | 1 | 0 | 1.500555  | 3.648264 | -0.680247 |
| 48 | 6 | 0 | -0.963205 | 4.077315 | 2.269077  |
| 49 | 1 | 0 | -1.526326 | 2.029582 | 1.882189  |
| 50 | 6 | 0 | -0.118105 | 5.124117 | 1.916156  |
| 51 | 1 | 0 | 1.435437  | 5.773655 | 0.579837  |
| 52 | 1 | 0 | -1.656568 | 4.192237 | 3.093504  |
| 53 | 1 | 0 | -0.156981 | 6.061591 | 2.457003  |

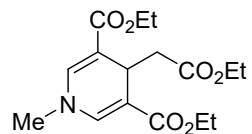

E = -1129.542389 a.u.

| Center Number | Atomic Number | Atomic Type | Coordinates (Angstroms) |           |           |
|---------------|---------------|-------------|-------------------------|-----------|-----------|
|               |               |             | X                       | Y         | Z         |
| 1             | 6             | 0           | 1.152457                | -1.247045 | 1.128232  |
| 2             | 6             | 0           | 1.206843                | -0.891144 | -0.167529 |
| 3             | 6             | 0           | -0.017632               | -0.419051 | -0.921660 |
| 4             | 6             | 0           | -1.253881               | -0.857691 | -0.166387 |
| 5             | 6             | 0           | -1.208287               | -1.215915 | 1.128884  |
| 6             | 7             | 0           | -0.029260               | -1.353989 | 1.819239  |
| 7             | 1             | 0           | 2.046679                | -1.505919 | 1.681708  |
| 8             | 1             | 0           | -2.108721               | -1.451814 | 1.682492  |
| 9             | 6             | 0           | -0.028892               | -1.399213 | 3.271350  |
| 10            | 1             | 0           | 0.847118                | -1.949450 | 3.615951  |
| 11            | 1             | 0           | -0.010332               | -0.389731 | 3.690922  |
| 12            | 1             | 0           | -0.923649               | -1.917261 | 3.617407  |
| 13            | 6             | 0           | 0.004237                | 1.096589  | -1.186890 |
| 14            | 1             | 0           | 0.879137                | 1.352641  | -1.790747 |
| 15            | 1             | 0           | -0.871440               | 1.378961  | -1.778318 |
| 16            | 6             | 0           | 0.025633                | 1.961537  | 0.048555  |

|    |   |   |           |           |           |
|----|---|---|-----------|-----------|-----------|
| 17 | 6 | 0 | -2.531607 | -0.829932 | -0.891355 |
| 18 | 6 | 0 | 2.484104  | -0.899747 | -0.893858 |
| 19 | 8 | 0 | -2.641583 | -0.481834 | -2.043523 |
| 20 | 8 | 0 | 2.602654  | -0.556101 | -2.046454 |
| 21 | 8 | 0 | 0.003056  | 1.589119  | 1.193858  |
| 22 | 8 | 0 | -3.587657 | -1.225918 | -0.150629 |
| 23 | 8 | 0 | 0.075141  | 3.261472  | -0.287823 |
| 24 | 8 | 0 | 3.529268  | -1.324948 | -0.153766 |
| 25 | 6 | 0 | 4.801788  | -1.320145 | -0.814034 |
| 26 | 1 | 0 | 4.741489  | -1.950382 | -1.703885 |
| 27 | 1 | 0 | 5.025672  | -0.302451 | -1.142149 |
| 28 | 6 | 0 | 5.822759  | -1.833506 | 0.176312  |
| 29 | 1 | 0 | 6.813034  | -1.843447 | -0.282546 |
| 30 | 1 | 0 | 5.856769  | -1.194419 | 1.060116  |
| 31 | 1 | 0 | 5.576640  | -2.849166 | 0.489997  |
| 32 | 6 | 0 | -4.859873 | -1.184812 | -0.810218 |
| 33 | 1 | 0 | -5.054292 | -0.161129 | -1.138599 |
| 34 | 1 | 0 | -4.817887 | -1.816626 | -1.699982 |
| 35 | 6 | 0 | -5.894923 | -1.668306 | 0.180418  |
| 36 | 1 | 0 | -6.885267 | -1.648157 | -0.277995 |
| 37 | 1 | 0 | -5.679161 | -2.691083 | 0.493392  |
| 38 | 1 | 0 | -5.909720 | -1.029059 | 1.064643  |
| 39 | 6 | 0 | 0.102376  | 4.195919  | 0.800300  |
| 40 | 1 | 0 | -0.804927 | 4.069377  | 1.395763  |
| 41 | 1 | 0 | 0.956375  | 3.964560  | 1.440721  |
| 42 | 6 | 0 | 0.199873  | 5.580932  | 0.201744  |
| 43 | 1 | 0 | 0.227321  | 6.328136  | 0.997047  |
| 44 | 1 | 0 | 1.107357  | 5.676160  | -0.396162 |
| 45 | 1 | 0 | -0.659643 | 5.785366  | -0.438104 |
| 46 | 1 | 0 | -0.024628 | -0.882323 | -1.912854 |

---

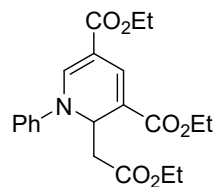

E = -1321.2538851 a.u.

| Center Number | Atomic Number | Atomic Type | Coordinates (Angstroms) |           |           |
|---------------|---------------|-------------|-------------------------|-----------|-----------|
|               |               |             | X                       | Y         | Z         |
| 1             | 6             | 0           | 0.268974                | 0.579547  | 0.068972  |
| 2             | 6             | 0           | -0.994990               | 1.353920  | -0.215184 |
| 3             | 6             | 0           | -2.184777               | 0.721803  | -0.188397 |
| 4             | 6             | 0           | -2.239025               | -0.712110 | -0.093984 |
| 5             | 6             | 0           | -1.081552               | -1.410424 | -0.315056 |
| 6             | 7             | 0           | 0.115680                | -0.807467 | -0.428451 |
| 7             | 1             | 0           | -3.100284               | 1.289983  | -0.306657 |
| 8             | 1             | 0           | -1.118584               | -2.481018 | -0.482615 |
| 9             | 6             | 0           | -3.485956               | -1.483874 | -0.006819 |
| 10            | 8             | 0           | -3.555387               | -2.690381 | -0.013628 |
| 11            | 8             | 0           | -4.565719               | -0.689253 | 0.086883  |
| 12            | 6             | 0           | -5.830531               | -1.360564 | 0.182640  |
| 13            | 1             | 0           | -5.809517               | -2.025391 | 1.048737  |
| 14            | 1             | 0           | -5.969470               | -1.977289 | -0.708071 |
| 15            | 6             | 0           | -6.894674               | -0.294088 | 0.309488  |
| 16            | 1             | 0           | -7.877992               | -0.760123 | 0.395099  |
| 17            | 1             | 0           | -6.721186               | 0.315943  | 1.197160  |
| 18            | 1             | 0           | -6.893754               | 0.357578  | -0.565420 |
| 19            | 6             | 0           | -0.948084               | 2.814136  | -0.412729 |
| 20            | 8             | 0           | -1.900155               | 3.530433  | -0.591087 |
| 21            | 8             | 0           | 0.318253                | 3.280823  | -0.355354 |
| 22            | 6             | 0           | 0.470222                | 4.698235  | -0.522739 |
| 23            | 1             | 0           | -0.096612               | 5.205732  | 0.260879  |
| 24            | 1             | 0           | 0.040047                | 4.986553  | -1.484205 |
| 25            | 6             | 0           | 1.948929                | 5.003662  | -0.443915 |
| 26            | 1             | 0           | 2.491921                | 4.484212  | -1.235108 |



|    |   |   |           |           |           |
|----|---|---|-----------|-----------|-----------|
| 27 | 1 | 0 | 2.112659  | 6.076604  | -0.558658 |
| 28 | 1 | 0 | 2.355937  | 4.691443  | 0.519114  |
| 29 | 1 | 0 | 1.119244  | 1.028542  | -0.439419 |
| 30 | 6 | 0 | 0.563956  | 0.565502  | 1.583494  |
| 31 | 1 | 0 | 0.717386  | 1.600692  | 1.899330  |
| 32 | 1 | 0 | -0.278411 | 0.136904  | 2.127781  |
| 33 | 6 | 0 | 1.798839  | -0.243905 | 1.892814  |
| 34 | 8 | 0 | 1.829062  | -1.235220 | 2.571378  |
| 35 | 8 | 0 | 2.869393  | 0.258723  | 1.261254  |
| 36 | 6 | 0 | 4.066769  | -0.535723 | 1.318310  |
| 37 | 1 | 0 | 4.350259  | -0.671681 | 2.364013  |
| 38 | 1 | 0 | 3.842681  | -1.517876 | 0.893157  |
| 39 | 6 | 0 | 5.126988  | 0.194171  | 0.526328  |
| 40 | 1 | 0 | 6.052736  | -0.384253 | 0.526897  |
| 41 | 1 | 0 | 4.803020  | 0.327869  | -0.507093 |
| 42 | 1 | 0 | 5.328912  | 1.174553  | 0.960979  |
| 43 | 6 | 0 | 1.275870  | -1.555668 | -0.797140 |
| 44 | 6 | 0 | 1.504359  | -2.814109 | -0.242334 |
| 45 | 6 | 0 | 2.180757  | -1.026867 | -1.717677 |
| 46 | 6 | 0 | 2.615926  | -3.552299 | -0.633339 |
| 47 | 1 | 0 | 0.832595  | -3.197258 | 0.516533  |
| 48 | 6 | 0 | 3.299678  | -1.763022 | -2.086739 |
| 49 | 1 | 0 | 1.999383  | -0.051745 | -2.154541 |
| 50 | 6 | 0 | 3.518130  | -3.030911 | -1.554216 |
| 51 | 1 | 0 | 2.784109  | -4.529091 | -0.195988 |
| 52 | 1 | 0 | 3.995277  | -1.349342 | -2.807594 |
| 53 | 1 | 0 | 4.387454  | -3.604738 | -1.851380 |

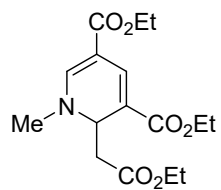

E = -1129.5397447 a.u.

| Center<br>Number | Atomic<br>Number | Atomic<br>Type | Coordinates (Angstroms) |           |           |
|------------------|------------------|----------------|-------------------------|-----------|-----------|
|                  |                  |                | X                       | Y         | Z         |
| 1                | 6                | 0              | 0.716345                | -0.112141 | -0.279751 |
| 2                | 6                | 0              | -0.314957               | 0.991885  | -0.235364 |
| 3                | 6                | 0              | -1.627738               | 0.690860  | -0.159270 |
| 4                | 6                | 0              | -2.072713               | -0.665017 | -0.306622 |
| 5                | 6                | 0              | -1.163577               | -1.577864 | -0.781348 |
| 6                | 7                | 0              | 0.132094                | -1.291662 | -0.940809 |
| 7                | 1                | 0              | -2.353781               | 1.487647  | -0.044969 |
| 8                | 1                | 0              | -1.500491               | -2.559272 | -1.100275 |
| 9                | 6                | 0              | 1.037066                | -2.244237 | -1.568353 |
| 10               | 1                | 0              | 1.773377                | -1.699070 | -2.161516 |
| 11               | 1                | 0              | 1.560850                | -2.857287 | -0.828810 |
| 12               | 1                | 0              | 0.468077                | -2.898309 | -2.227891 |
| 13               | 6                | 0              | -3.470943               | -1.091114 | -0.196182 |
| 14               | 8                | 0              | -3.873147               | -2.213804 | -0.397373 |
| 15               | 8                | 0              | -4.280941               | -0.078579 | 0.161175  |
| 16               | 6                | 0              | -5.671533               | -0.404908 | 0.292286  |
| 17               | 1                | 0              | -5.778942               | -1.191467 | 1.042400  |
| 18               | 1                | 0              | -6.031827               | -0.801074 | -0.659567 |
| 19               | 6                | 0              | -6.393042               | 0.862835  | 0.689996  |
| 20               | 1                | 0              | -7.459704               | 0.661962  | 0.805198  |
| 21               | 1                | 0              | -6.007402               | 1.243956  | 1.636779  |
| 22               | 1                | 0              | -6.265067               | 1.633373  | -0.071705 |
| 23               | 6                | 0              | 0.113156                | 2.399300  | -0.164198 |
| 24               | 8                | 0              | -0.615190               | 3.357445  | -0.102338 |
| 25               | 8                | 0              | 1.461177                | 2.505145  | -0.157441 |
| 26               | 6                | 0              | 1.983620                | 3.838878  | -0.074600 |
| 27               | 1                | 0              | 1.588832                | 4.314063  | 0.826012  |
| 28               | 1                | 0              | 1.627761                | 4.410057  | -0.934878 |
| 29               | 6                | 0              | 3.491581                | 3.729770  | -0.046851 |
| 30               | 1                | 0              | 3.861028                | 3.253516  | -0.956315 |
| 31               | 1                | 0              | 3.934130                | 4.724687  | 0.028071  |
| 32               | 1                | 0              | 3.818285                | 3.140069  | 0.811336  |
| 33               | 1                | 0              | 1.582078                | 0.194984  | -0.868213 |
| 34               | 6                | 0              | 1.195974                | -0.450550 | 1.148256  |

|    |   |   |          |           |           |
|----|---|---|----------|-----------|-----------|
| 35 | 1 | 0 | 1.581683 | 0.475814  | 1.583279  |
| 36 | 1 | 0 | 0.361345 | -0.811805 | 1.750393  |
| 37 | 6 | 0 | 2.294106 | -1.481680 | 1.183369  |
| 38 | 8 | 0 | 2.266225 | -2.515633 | 1.794981  |
| 39 | 8 | 0 | 3.332590 | -1.112642 | 0.412277  |
| 40 | 6 | 0 | 4.425593 | -2.041869 | 0.340576  |
| 41 | 1 | 0 | 4.824429 | -2.193443 | 1.345656  |
| 42 | 1 | 0 | 4.044204 | -3.003411 | -0.013302 |
| 43 | 6 | 0 | 5.453405 | -1.457225 | -0.600914 |
| 44 | 1 | 0 | 6.304817 | -2.134555 | -0.686265 |
| 45 | 1 | 0 | 5.026768 | -1.310618 | -1.594678 |
| 46 | 1 | 0 | 5.811121 | -0.495170 | -0.231517 |

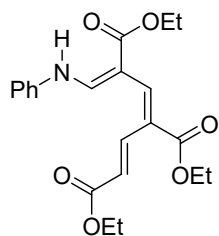

E = -1321.2314655 a.u.

| Center<br>Number | Atomic<br>Number | Atomic<br>Type | Coordinates (Angstroms) |           |           |
|------------------|------------------|----------------|-------------------------|-----------|-----------|
|                  |                  |                | X                       | Y         | Z         |
| 1                | 6                | 0              | -1.388259               | 0.970376  | -0.297672 |
| 2                | 1                | 0              | -0.379020               | 0.919005  | -0.690004 |
| 3                | 6                | 0              | -2.072625               | -0.208823 | -0.070531 |
| 4                | 6                | 0              | -1.464980               | -1.501193 | -0.285615 |
| 5                | 1                | 0              | -2.144876               | -2.306341 | -0.544149 |
| 6                | 6                | 0              | -0.148696               | -1.838103 | -0.209174 |
| 7                | 6                | 0              | 0.166208                | -3.240792 | -0.610694 |
| 8                | 6                | 0              | -3.491481               | -0.133483 | 0.299778  |
| 9                | 8                | 0              | -0.642946               | -4.032541 | -1.026155 |
| 10               | 8                | 0              | -4.107565               | 0.903648  | 0.474635  |
| 11               | 8                | 0              | 1.460987                | -3.552835 | -0.449900 |

|    |   |   |           |           |           |
|----|---|---|-----------|-----------|-----------|
| 12 | 8 | 0 | -4.069088 | -1.331753 | 0.434902  |
| 13 | 6 | 0 | 1.828015  | -4.898251 | -0.790098 |
| 14 | 1 | 0 | 1.253202  | -5.585686 | -0.165918 |
| 15 | 1 | 0 | 1.553799  | -5.085287 | -1.830535 |
| 16 | 6 | 0 | 3.316595  | -5.026121 | -0.558256 |
| 17 | 1 | 0 | 3.642519  | -6.040545 | -0.794945 |
| 18 | 1 | 0 | 3.867864  | -4.329830 | -1.192426 |
| 19 | 1 | 0 | 3.562599  | -4.815713 | 0.483620  |
| 20 | 6 | 0 | -5.464006 | -1.329012 | 0.779899  |
| 21 | 1 | 0 | -6.013108 | -0.780594 | 0.011677  |
| 22 | 1 | 0 | -5.588172 | -0.797291 | 1.725462  |
| 23 | 6 | 0 | -5.902244 | -2.772427 | 0.874242  |
| 24 | 1 | 0 | -5.333196 | -3.298113 | 1.642054  |
| 25 | 1 | 0 | -6.961587 | -2.819634 | 1.133032  |
| 26 | 1 | 0 | -5.753986 | -3.282474 | -0.078501 |
| 27 | 7 | 0 | -1.857541 | 2.209676  | -0.140839 |
| 28 | 1 | 0 | -2.832681 | 2.290217  | 0.140180  |
| 29 | 6 | 0 | 0.858609  | -0.911575 | 0.294728  |
| 30 | 1 | 0 | 0.476269  | -0.154283 | 0.978015  |
| 31 | 6 | 0 | 2.171582  | -0.846148 | 0.036772  |
| 32 | 1 | 0 | 2.692700  | -1.539535 | -0.606540 |
| 33 | 6 | 0 | 2.958773  | 0.241996  | 0.649929  |
| 34 | 8 | 0 | 2.511373  | 1.167130  | 1.288791  |
| 35 | 8 | 0 | 4.268564  | 0.102799  | 0.393960  |
| 36 | 6 | 0 | 5.125354  | 1.121615  | 0.929308  |
| 37 | 1 | 0 | 4.806232  | 2.089970  | 0.536735  |
| 38 | 1 | 0 | 5.004293  | 1.146871  | 2.014458  |
| 39 | 6 | 0 | 6.540206  | 0.780247  | 0.520717  |
| 40 | 1 | 0 | 6.631853  | 0.757523  | -0.566113 |
| 41 | 1 | 0 | 7.230739  | 1.529458  | 0.912071  |
| 42 | 1 | 0 | 6.828392  | -0.195650 | 0.913800  |
| 43 | 6 | 0 | -1.084746 | 3.377638  | -0.330659 |
| 44 | 6 | 0 | -1.721819 | 4.539053  | -0.766664 |
| 45 | 6 | 0 | 0.283701  | 3.382699  | -0.060644 |
| 46 | 6 | 0 | -0.984452 | 5.700396  | -0.951648 |
| 47 | 1 | 0 | -2.786934 | 4.521153  | -0.968817 |
| 48 | 6 | 0 | 1.012135  | 4.548490  | -0.265718 |

|    |   |   |           |          |           |
|----|---|---|-----------|----------|-----------|
| 49 | 1 | 0 | 0.777187  | 2.506601 | 0.348066  |
| 50 | 6 | 0 | 0.386771  | 5.707957 | -0.712061 |
| 51 | 1 | 0 | -1.482761 | 6.600089 | -1.292217 |
| 52 | 1 | 0 | 2.073519  | 4.548596 | -0.047789 |
| 53 | 1 | 0 | 0.959492  | 6.614946 | -0.860866 |

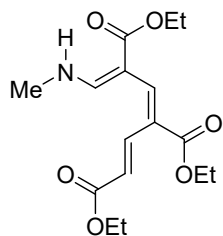

E = -1129.5164056 a.u.

| Center Number | Atomic Number | Atomic Type | Coordinates (Angstroms) |           |           |
|---------------|---------------|-------------|-------------------------|-----------|-----------|
|               |               |             | X                       | Y         | Z         |
| 1             | 6             | 0           | -1.364810               | -1.813386 | 0.721149  |
| 2             | 1             | 0           | -0.370648               | -1.660288 | 1.130303  |
| 3             | 6             | 0           | -2.074287               | -0.702828 | 0.285997  |
| 4             | 6             | 0           | -1.504168               | 0.620761  | 0.296818  |
| 5             | 1             | 0           | -2.209164               | 1.437589  | 0.412863  |
| 6             | 6             | 0           | -0.193944               | 0.978162  | 0.181905  |
| 7             | 6             | 0           | 0.078582                | 2.432417  | 0.365862  |
| 8             | 6             | 0           | -3.477694               | -0.882706 | -0.092305 |
| 9             | 8             | 0           | -0.762875               | 3.266595  | 0.592213  |
| 10            | 8             | 0           | -4.046859               | -1.960125 | -0.153836 |
| 11            | 8             | 0           | 1.379500                | 2.740380  | 0.244457  |
| 12            | 8             | 0           | -4.105835               | 0.264651  | -0.376684 |
| 13            | 6             | 0           | 1.710227                | 4.130253  | 0.376785  |
| 14            | 1             | 0           | 1.193455                | 4.688229  | -0.407088 |
| 15            | 1             | 0           | 1.342155                | 4.490663  | 1.339528  |
| 16            | 6             | 0           | 3.213493                | 4.243291  | 0.259130  |
| 17            | 1             | 0           | 3.514150                | 5.289546  | 0.338743  |
| 18            | 1             | 0           | 3.706256                | 3.681406  | 1.054465  |

|    |   |   |           |           |           |
|----|---|---|-----------|-----------|-----------|
| 19 | 1 | 0 | 3.554641  | 3.855982  | -0.702103 |
| 20 | 6 | 0 | -5.488585 | 0.155590  | -0.748802 |
| 21 | 1 | 0 | -6.030960 | -0.342826 | 0.057258  |
| 22 | 1 | 0 | -5.561143 | -0.472558 | -1.639223 |
| 23 | 6 | 0 | -5.994967 | 1.558047  | -0.996246 |
| 24 | 1 | 0 | -5.428121 | 2.036852  | -1.795774 |
| 25 | 1 | 0 | -7.046600 | 1.525017  | -1.286950 |
| 26 | 1 | 0 | -5.902630 | 2.164792  | -0.094435 |
| 27 | 7 | 0 | -1.779297 | -3.071849 | 0.738840  |
| 28 | 1 | 0 | -2.714643 | -3.241826 | 0.378809  |
| 29 | 6 | 0 | -0.985337 | -4.171283 | 1.252664  |
| 30 | 1 | 0 | -0.871267 | -4.942774 | 0.489696  |
| 31 | 1 | 0 | 0.005219  | -3.803638 | 1.519092  |
| 32 | 1 | 0 | -1.452853 | -4.610067 | 2.136603  |
| 33 | 6 | 0 | 0.835208  | 0.012016  | -0.180612 |
| 34 | 1 | 0 | 0.460841  | -0.860949 | -0.713177 |
| 35 | 6 | 0 | 2.158955  | 0.022413  | 0.030279  |
| 36 | 1 | 0 | 2.685439  | 0.821851  | 0.529665  |
| 37 | 6 | 0 | 2.947885  | -1.136419 | -0.433015 |
| 38 | 8 | 0 | 2.502415  | -2.156857 | -0.903598 |
| 39 | 8 | 0 | 4.264871  | -0.935609 | -0.248476 |
| 40 | 6 | 0 | 5.125227  | -2.006510 | -0.659101 |
| 41 | 1 | 0 | 4.857896  | -2.906749 | -0.100776 |
| 42 | 1 | 0 | 4.952522  | -2.210099 | -1.718216 |
| 43 | 6 | 0 | 6.547731  | -1.571876 | -0.388451 |
| 44 | 1 | 0 | 6.692984  | -1.368273 | 0.673428  |
| 45 | 1 | 0 | 7.239872  | -2.360680 | -0.688720 |
| 46 | 1 | 0 | 6.786839  | -0.668184 | -0.950828 |

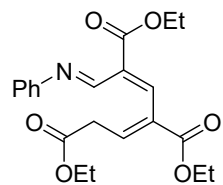

E = -1321.2107736 a.u.

| Center<br>Number | Atomic<br>Number | Atomic<br>Type | Coordinates (Angstroms) |           |           |
|------------------|------------------|----------------|-------------------------|-----------|-----------|
|                  |                  |                | X                       | Y         | Z         |
| 1                | 6                | 0              | -0.958330               | 1.484186  | 1.216759  |
| 2                | 6                | 0              | -1.865002               | 0.987400  | 0.362814  |
| 3                | 6                | 0              | -2.104164               | -0.440609 | 0.097174  |
| 4                | 6                | 0              | -1.153839               | -1.328181 | -0.234413 |
| 5                | 6                | 0              | 0.252306                | -0.940445 | -0.453359 |
| 6                | 7                | 0              | 1.201434                | -1.739270 | -0.182118 |
| 7                | 1                | 0              | -3.135859               | -0.772941 | 0.142495  |
| 8                | 1                | 0              | 0.428902                | 0.078153  | -0.821006 |
| 9                | 6                | 0              | -1.529155               | -2.751535 | -0.520585 |
| 10               | 8                | 0              | -0.965469               | -3.454126 | -1.311999 |
| 11               | 8                | 0              | -2.606004               | -3.135727 | 0.181406  |
| 12               | 6                | 0              | -3.090175               | -4.458978 | -0.102520 |
| 13               | 1                | 0              | -2.283536               | -5.171622 | 0.080533  |
| 14               | 1                | 0              | -3.351787               | -4.514585 | -1.161613 |
| 15               | 6                | 0              | -4.282601               | -4.702219 | 0.793626  |
| 16               | 1                | 0              | -4.687430               | -5.698744 | 0.608482  |
| 17               | 1                | 0              | -3.993966               | -4.635235 | 1.843543  |
| 18               | 1                | 0              | -5.066633               | -3.968536 | 0.600382  |
| 19               | 6                | 0              | -2.816434               | 1.898547  | -0.349001 |
| 20               | 8                | 0              | -3.733903               | 1.494934  | -1.016147 |
| 21               | 8                | 0              | -2.552029               | 3.197560  | -0.169584 |
| 22               | 6                | 0              | -3.440347               | 4.112594  | -0.834543 |
| 23               | 1                | 0              | -4.451088               | 3.955178  | -0.452063 |
| 24               | 1                | 0              | -3.445759               | 3.879885  | -1.901150 |
| 25               | 6                | 0              | -2.936080               | 5.509690  | -0.556532 |
| 26               | 1                | 0              | -1.925121               | 5.638570  | -0.945638 |
| 27               | 1                | 0              | -3.588538               | 6.239559  | -1.038872 |
| 28               | 1                | 0              | -2.926298               | 5.710491  | 0.515658  |
| 29               | 1                | 0              | -0.905226               | 2.564134  | 1.308230  |
| 30               | 6                | 0              | -0.060768               | 0.704014  | 2.124018  |
| 31               | 1                | 0              | -0.241316               | 1.019694  | 3.157085  |
| 32               | 1                | 0              | -0.246240               | -0.369980 | 2.085083  |
| 33               | 6                | 0              | 1.428686                | 0.919299  | 1.898928  |

|    |   |   |          |           |           |
|----|---|---|----------|-----------|-----------|
| 34 | 8 | 0 | 2.276217 | 0.467009  | 2.616989  |
| 35 | 8 | 0 | 1.678206 | 1.683817  | 0.830915  |
| 36 | 6 | 0 | 3.066251 | 1.987843  | 0.576575  |
| 37 | 1 | 0 | 3.459395 | 2.528945  | 1.440532  |
| 38 | 1 | 0 | 3.617331 | 1.052577  | 0.479573  |
| 39 | 6 | 0 | 3.115705 | 2.812834  | -0.687756 |
| 40 | 1 | 0 | 4.154955 | 3.033139  | -0.939665 |
| 41 | 1 | 0 | 2.672263 | 2.259160  | -1.516899 |
| 42 | 1 | 0 | 2.578308 | 3.754533  | -0.563308 |
| 43 | 6 | 0 | 2.522936 | -1.348737 | -0.474098 |
| 44 | 6 | 0 | 2.865304 | -0.698990 | -1.664166 |
| 45 | 6 | 0 | 3.524185 | -1.684527 | 0.441253  |
| 46 | 6 | 0 | 4.191551 | -0.365021 | -1.917607 |
| 47 | 1 | 0 | 2.097314 | -0.497612 | -2.402747 |
| 48 | 6 | 0 | 4.843005 | -1.334778 | 0.188311  |
| 49 | 1 | 0 | 3.242983 | -2.199745 | 1.351372  |
| 50 | 6 | 0 | 5.182538 | -0.673353 | -0.991226 |
| 51 | 1 | 0 | 4.451444 | 0.127341  | -2.847719 |
| 52 | 1 | 0 | 5.610752 | -1.582943 | 0.911403  |
| 53 | 1 | 0 | 6.215546 | -0.416462 | -1.193422 |

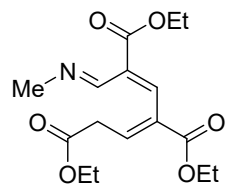

E = -1129.491794 a.u.

| Center Number | Atomic Number | Atomic Type | Coordinates (Angstroms) |           |           |
|---------------|---------------|-------------|-------------------------|-----------|-----------|
|               |               |             | X                       | Y         | Z         |
| 1             | 6             | 0           | 1.177211                | 0.489742  | 1.081582  |
| 2             | 6             | 0           | 0.317305                | 1.251207  | 0.390168  |
| 3             | 6             | 0           | -1.104196               | 0.948814  | 0.149641  |
| 4             | 6             | 0           | -1.562325               | -0.203665 | -0.357230 |



|    |   |   |           |           |           |
|----|---|---|-----------|-----------|-----------|
| 5  | 6 | 0 | -0.665828 | -1.292851 | -0.810313 |
| 6  | 7 | 0 | -0.947720 | -2.502143 | -0.582034 |
| 7  | 1 | 0 | -1.810115 | 1.742138  | 0.370352  |
| 8  | 1 | 0 | 0.257107  | -0.987831 | -1.323970 |
| 9  | 6 | 0 | -0.031995 | -3.512317 | -1.066266 |
| 10 | 1 | 0 | 0.322466  | -4.099181 | -0.214409 |
| 11 | 1 | 0 | -0.579167 | -4.190383 | -1.724747 |
| 12 | 1 | 0 | 0.825372  | -3.092241 | -1.610340 |
| 13 | 6 | 0 | -3.030477 | -0.391464 | -0.594336 |
| 14 | 8 | 0 | -3.493715 | -1.120767 | -1.426702 |
| 15 | 8 | 0 | -3.774647 | 0.386185  | 0.207104  |
| 16 | 6 | 0 | 0.746484  | 2.586678  | -0.134657 |
| 17 | 8 | 0 | -0.015101 | 3.364149  | -0.649419 |
| 18 | 8 | 0 | 2.051497  | 2.835141  | 0.030185  |
| 19 | 1 | 0 | 2.194329  | 0.855780  | 1.174785  |
| 20 | 6 | 0 | 0.867267  | -0.775230 | 1.817737  |
| 21 | 1 | 0 | 1.116497  | -0.637525 | 2.875535  |
| 22 | 1 | 0 | -0.187273 | -1.049421 | 1.775169  |
| 23 | 6 | 0 | 1.670935  | -1.987744 | 1.378923  |
| 24 | 8 | 0 | 1.650012  | -3.042245 | 1.950179  |
| 25 | 8 | 0 | 2.421976  | -1.744124 | 0.295859  |
| 26 | 6 | 0 | -5.193034 | 0.323240  | -0.011910 |
| 27 | 1 | 0 | -5.398676 | 0.581202  | -1.053057 |
| 28 | 1 | 0 | -5.524277 | -0.704862 | 0.149238  |
| 29 | 6 | 0 | -5.839600 | 1.289611  | 0.953875  |
| 30 | 1 | 0 | -5.485636 | 2.306125  | 0.775628  |
| 31 | 1 | 0 | -6.923145 | 1.272233  | 0.824359  |
| 32 | 1 | 0 | -5.608750 | 1.016067  | 1.984441  |
| 33 | 6 | 0 | 3.289913  | -2.811241 | -0.128903 |
| 34 | 1 | 0 | 2.702967  | -3.724862 | -0.231696 |
| 35 | 1 | 0 | 4.035121  | -2.977939 | 0.652379  |
| 36 | 6 | 0 | 3.917315  | -2.381651 | -1.434922 |
| 37 | 1 | 0 | 3.150574  | -2.218863 | -2.194699 |
| 38 | 1 | 0 | 4.479189  | -1.455424 | -1.307095 |
| 39 | 1 | 0 | 4.598688  | -3.155915 | -1.791456 |
| 40 | 6 | 0 | 2.510628  | 4.108116  | -0.455587 |
| 41 | 1 | 0 | 1.961395  | 4.897693  | 0.061318  |

|    |   |   |          |          |           |
|----|---|---|----------|----------|-----------|
| 42 | 1 | 0 | 2.277252 | 4.179660 | -1.519853 |
| 43 | 6 | 0 | 3.996801 | 4.179662 | -0.190591 |
| 44 | 1 | 0 | 4.389613 | 5.133206 | -0.547838 |
| 45 | 1 | 0 | 4.202514 | 4.099104 | 0.877754  |
| 46 | 1 | 0 | 4.519407 | 3.374088 | -0.708492 |

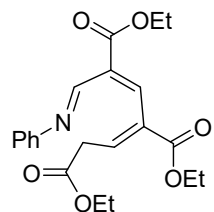

E = -1321.2130765 a.u.

| Center Number | Atomic Number | Atomic Type | Coordinates (Angstroms) |           |           |
|---------------|---------------|-------------|-------------------------|-----------|-----------|
|               |               |             | X                       | Y         | Z         |
| 1             | 6             | 0           | -0.087380               | 1.439241  | 1.270400  |
| 2             | 6             | 0           | -1.110164               | 1.419481  | 0.405769  |
| 3             | 6             | 0           | -2.065523               | 0.315246  | 0.220107  |
| 4             | 6             | 0           | -1.819111               | -0.967919 | -0.107679 |
| 5             | 6             | 0           | -0.520956               | -1.547935 | -0.508073 |
| 6             | 7             | 0           | 0.564939                | -0.892015 | -0.453721 |
| 7             | 1             | 0           | -3.108830               | 0.601297  | 0.312088  |
| 8             | 1             | 0           | -0.570183               | -2.565874 | -0.906635 |
| 9             | 6             | 0           | -2.967075               | -1.923440 | -0.235937 |
| 10            | 8             | 0           | -2.845635               | -3.059782 | -0.618519 |
| 11            | 8             | 0           | -4.142425               | -1.395353 | 0.119617  |
| 12            | 6             | 0           | -5.285462               | -2.256765 | -0.016488 |
| 13            | 1             | 0           | -5.144614               | -3.126213 | 0.629175  |
| 14            | 1             | 0           | -5.335009               | -2.609407 | -1.048493 |
| 15            | 6             | 0           | -6.502301               | -1.447839 | 0.370019  |
| 16            | 1             | 0           | -7.397998               | -2.065939 | 0.287409  |
| 17            | 1             | 0           | -6.419348               | -1.094230 | 1.398644  |
| 18            | 1             | 0           | -6.613946               | -0.584759 | -0.287654 |

|    |   |   |           |           |           |
|----|---|---|-----------|-----------|-----------|
| 19 | 6 | 0 | -1.469357 | 2.642356  | -0.373922 |
| 20 | 8 | 0 | -2.475817 | 2.733207  | -1.030623 |
| 21 | 8 | 0 | -0.566675 | 3.625718  | -0.273137 |
| 22 | 6 | 0 | -0.864304 | 4.824255  | -1.008013 |
| 23 | 1 | 0 | -1.806813 | 5.234824  | -0.639435 |
| 24 | 1 | 0 | -1.001419 | 4.564271  | -2.059617 |
| 25 | 6 | 0 | 0.291534  | 5.775799  | -0.800889 |
| 26 | 1 | 0 | 1.220107  | 5.340046  | -1.172370 |
| 27 | 1 | 0 | 0.104679  | 6.706224  | -1.339833 |
| 28 | 1 | 0 | 0.414979  | 6.007978  | 0.257893  |
| 29 | 1 | 0 | 0.506460  | 2.344625  | 1.330955  |
| 30 | 6 | 0 | 0.261872  | 0.339689  | 2.215663  |
| 31 | 1 | 0 | 0.255341  | 0.746018  | 3.235511  |
| 32 | 1 | 0 | -0.451115 | -0.481927 | 2.186045  |
| 33 | 6 | 0 | 1.641872  | -0.267507 | 2.038428  |
| 34 | 8 | 0 | 1.919975  | -1.379726 | 2.396682  |
| 35 | 8 | 0 | 2.519413  | 0.588006  | 1.509556  |
| 36 | 6 | 0 | 3.866879  | 0.095453  | 1.362147  |
| 37 | 1 | 0 | 4.268402  | -0.108996 | 2.357568  |
| 38 | 1 | 0 | 3.839646  | -0.842981 | 0.805057  |
| 39 | 6 | 0 | 4.654749  | 1.160720  | 0.636299  |
| 40 | 1 | 0 | 5.681008  | 0.819484  | 0.487461  |
| 41 | 1 | 0 | 4.211077  | 1.356986  | -0.340977 |
| 42 | 1 | 0 | 4.674975  | 2.090274  | 1.207702  |
| 43 | 6 | 0 | 1.762819  | -1.488479 | -0.888217 |
| 44 | 6 | 0 | 2.173069  | -2.750455 | -0.451763 |
| 45 | 6 | 0 | 2.603770  | -0.728873 | -1.706272 |
| 46 | 6 | 0 | 3.408668  | -3.249609 | -0.849595 |
| 47 | 1 | 0 | 1.548671  | -3.301918 | 0.241415  |
| 48 | 6 | 0 | 3.826978  | -1.242311 | -2.113603 |
| 49 | 1 | 0 | 2.277092  | 0.259717  | -2.007449 |
| 50 | 6 | 0 | 4.236420  | -2.503100 | -1.682948 |
| 51 | 1 | 0 | 3.731225  | -4.221061 | -0.494068 |
| 52 | 1 | 0 | 4.469702  | -0.652730 | -2.757411 |
| 53 | 1 | 0 | 5.198646  | -2.896199 | -1.988147 |

---

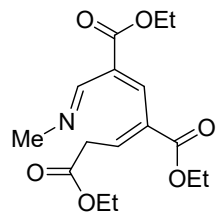

E = -1129.4841736 a.u.

| Center<br>Number | Atomic<br>Number | Atomic<br>Type | Coordinates (Angstroms) |           |           |
|------------------|------------------|----------------|-------------------------|-----------|-----------|
|                  |                  |                | X                       | Y         | Z         |
| 1                | 6                | 0              | -1.069537               | -0.090012 | -0.356031 |
| 2                | 6                | 0              | -0.089159               | 0.823365  | -0.294607 |
| 3                | 6                | 0              | 1.329738                | 0.417909  | -0.297338 |
| 4                | 6                | 0              | 1.857876                | -0.545498 | 0.469525  |
| 5                | 6                | 0              | 1.131466                | -1.332279 | 1.513646  |
| 6                | 7                | 0              | 0.473196                | -0.903955 | 2.506567  |
| 7                | 1                | 0              | 1.984267                | 0.960086  | -0.972321 |
| 8                | 1                | 0              | 1.223481                | -2.415417 | 1.416308  |
| 9                | 6                | 0              | 0.349579                | 0.516480  | 2.767618  |
| 10               | 1                | 0              | -0.659686               | 0.837185  | 2.487662  |
| 11               | 1                | 0              | 0.447486                | 0.671060  | 3.843198  |
| 12               | 1                | 0              | 1.075629                | 1.146468  | 2.242398  |
| 13               | 6                | 0              | 3.284986                | -0.954501 | 0.303649  |
| 14               | 8                | 0              | 3.794174                | -1.833419 | 0.951032  |
| 15               | 8                | 0              | 3.938702                | -0.254824 | -0.631236 |
| 16               | 6                | 0              | 5.324499                | -0.593410 | -0.809087 |
| 17               | 1                | 0              | 5.392477                | -1.644278 | -1.098383 |
| 18               | 1                | 0              | 5.836596                | -0.475974 | 0.148115  |
| 19               | 6                | 0              | 5.878242                | 0.328697  | -1.870678 |
| 20               | 1                | 0              | 6.934788                | 0.109911  | -2.034905 |
| 21               | 1                | 0              | 5.346652                | 0.194747  | -2.813775 |
| 22               | 1                | 0              | 5.783552                | 1.370619  | -1.562027 |
| 23               | 6                | 0              | -0.282166               | 2.303183  | -0.270873 |
| 24               | 8                | 0              | 0.623431                | 3.087287  | -0.393605 |
| 25               | 8                | 0              | -1.554320               | 2.673075  | -0.078393 |
| 26               | 6                | 0              | -1.798838               | 4.091642  | -0.038543 |

|    |   |   |           |           |           |
|----|---|---|-----------|-----------|-----------|
| 27 | 1 | 0 | -1.453514 | 4.529602  | -0.977097 |
| 28 | 1 | 0 | -1.206287 | 4.523093  | 0.770763  |
| 29 | 6 | 0 | -3.283362 | 4.281659  | 0.171630  |
| 30 | 1 | 0 | -3.601835 | 3.828967  | 1.111881  |
| 31 | 1 | 0 | -3.517930 | 5.346900  | 0.204510  |
| 32 | 1 | 0 | -3.850389 | 3.828402  | -0.643094 |
| 33 | 1 | 0 | -0.759227 | -1.129681 | -0.386431 |
| 34 | 6 | 0 | -2.551770 | 0.134313  | -0.379125 |
| 35 | 1 | 0 | -2.882814 | 0.494044  | 0.603262  |
| 36 | 1 | 0 | -2.845137 | 0.914587  | -1.080159 |
| 37 | 6 | 0 | -3.391512 | -1.087977 | -0.685825 |
| 38 | 8 | 0 | -4.512526 | -1.023932 | -1.112179 |
| 39 | 8 | 0 | -2.775063 | -2.237577 | -0.393668 |
| 40 | 6 | 0 | -3.541799 | -3.438458 | -0.598826 |
| 41 | 1 | 0 | -4.442448 | -3.382758 | 0.015931  |
| 42 | 1 | 0 | -3.851445 | -3.477155 | -1.645084 |
| 43 | 6 | 0 | -2.658649 | -4.603428 | -0.216357 |
| 44 | 1 | 0 | -3.202695 | -5.539651 | -0.351914 |
| 45 | 1 | 0 | -1.764408 | -4.630448 | -0.840894 |
| 46 | 1 | 0 | -2.352249 | -4.527626 | 0.827806  |

Ph-TS

E = -1321.1987921 a.u.

| Center<br>Number | Atomic<br>Number | Atomic<br>Type | Coordinates (Angstroms) |           |           |
|------------------|------------------|----------------|-------------------------|-----------|-----------|
|                  |                  |                | X                       | Y         | Z         |
| 1                | 6                | 0              | 0.163859                | 0.997951  | 0.902755  |
| 2                | 6                | 0              | -1.027147               | 1.479651  | 0.393054  |
| 3                | 6                | 0              | -2.159615               | 0.635064  | 0.225531  |
| 4                | 6                | 0              | -2.025793               | -0.689176 | -0.111690 |
| 5                | 6                | 0              | -0.781096               | -1.244077 | -0.606353 |
| 6                | 7                | 0              | 0.385358                | -0.776226 | -0.350710 |
| 7                | 1                | 0              | -3.148855               | 1.080512  | 0.198074  |
| 8                | 1                | 0              | -0.900287               | -2.068877 | -1.313745 |
| 9                | 6                | 0              | -3.219341               | -1.536110 | -0.363296 |

|    |   |   |           |           |           |
|----|---|---|-----------|-----------|-----------|
| 10 | 8 | 0 | -3.184450 | -2.613426 | -0.906356 |
| 11 | 8 | 0 | -4.350613 | -0.981935 | 0.091091  |
| 12 | 6 | 0 | -5.551336 | -1.739729 | -0.130591 |
| 13 | 1 | 0 | -5.434043 | -2.721562 | 0.332489  |
| 14 | 1 | 0 | -5.676516 | -1.889654 | -1.205156 |
| 15 | 6 | 0 | -6.693860 | -0.955351 | 0.472226  |
| 16 | 1 | 0 | -7.630646 | -1.495806 | 0.325821  |
| 17 | 1 | 0 | -6.539455 | -0.812053 | 1.542572  |
| 18 | 1 | 0 | -6.781677 | 0.023760  | -0.000862 |
| 19 | 6 | 0 | -1.132619 | 2.844136  | -0.165254 |
| 20 | 8 | 0 | -2.163985 | 3.349033  | -0.534530 |
| 21 | 8 | 0 | 0.050942  | 3.486224  | -0.212630 |
| 22 | 6 | 0 | 0.017014  | 4.812680  | -0.760260 |
| 23 | 1 | 0 | -0.644090 | 5.428452  | -0.146826 |
| 24 | 1 | 0 | -0.406984 | 4.767369  | -1.765596 |
| 25 | 6 | 0 | 1.436492  | 5.332964  | -0.763145 |
| 26 | 1 | 0 | 2.077875  | 4.699065  | -1.377614 |
| 27 | 1 | 0 | 1.459159  | 6.345307  | -1.170270 |
| 28 | 1 | 0 | 1.839712  | 5.358588  | 0.250297  |
| 29 | 1 | 0 | 1.053761  | 1.600842  | 0.742994  |
| 30 | 6 | 0 | 0.241191  | 0.086938  | 2.095342  |
| 31 | 1 | 0 | 0.297336  | 0.737620  | 2.978593  |
| 32 | 1 | 0 | -0.638418 | -0.545006 | 2.196157  |
| 33 | 6 | 0 | 1.467841  | -0.799588 | 2.104184  |
| 34 | 8 | 0 | 1.469322  | -1.958794 | 2.415738  |
| 35 | 8 | 0 | 2.563954  | -0.123418 | 1.738979  |
| 36 | 6 | 0 | 3.780531  | -0.888350 | 1.642152  |
| 37 | 1 | 0 | 3.958291  | -1.382957 | 2.599053  |
| 38 | 1 | 0 | 3.642836  | -1.657751 | 0.878137  |
| 39 | 6 | 0 | 4.885614  | 0.076376  | 1.280771  |
| 40 | 1 | 0 | 5.825697  | -0.466274 | 1.165701  |
| 41 | 1 | 0 | 4.658121  | 0.575773  | 0.337914  |
| 42 | 1 | 0 | 5.012673  | 0.831664  | 2.058219  |
| 43 | 6 | 0 | 1.535379  | -1.281475 | -0.989489 |
| 44 | 6 | 0 | 1.797524  | -2.653543 | -1.015145 |
| 45 | 6 | 0 | 2.470902  | -0.382678 | -1.506219 |
| 46 | 6 | 0 | 2.981571  | -3.118137 | -1.576558 |

|    |   |   |          |           |           |
|----|---|---|----------|-----------|-----------|
| 47 | 1 | 0 | 1.092506 | -3.339341 | -0.559681 |
| 48 | 6 | 0 | 3.647157 | -0.858517 | -2.069939 |
| 49 | 1 | 0 | 2.260165 | 0.680014  | -1.459454 |
| 50 | 6 | 0 | 3.909343 | -2.226375 | -2.106076 |
| 51 | 1 | 0 | 3.183683 | -4.182630 | -1.586192 |
| 52 | 1 | 0 | 4.366209 | -0.157420 | -2.478154 |
| 53 | 1 | 0 | 4.832415 | -2.593433 | -2.537841 |

-----

### Me-TS

E = -1129.480488 a.u.

| Center<br>Number | Atomic<br>Number | Atomic<br>Type | Coordinates (Angstroms) |           |           |
|------------------|------------------|----------------|-------------------------|-----------|-----------|
|                  |                  |                | X                       | Y         | Z         |
| 1                | 6                | 0              | -0.947347               | 0.272385  | -0.553526 |
| 2                | 6                | 0              | 0.111221                | 1.143077  | -0.395246 |
| 3                | 6                | 0              | 1.450320                | 0.667255  | -0.278461 |
| 4                | 6                | 0              | 1.730494                | -0.508360 | 0.367074  |
| 5                | 6                | 0              | 0.757846                | -1.177292 | 1.216927  |
| 6                | 7                | 0              | -0.511714               | -1.131348 | 1.073500  |
| 7                | 1                | 0              | 2.271821                | 1.318494  | -0.557776 |
| 8                | 1                | 0              | 1.197620                | -1.681716 | 2.082430  |
| 9                | 6                | 0              | -1.369592               | -1.615013 | 2.139410  |
| 10               | 1                | 0              | -2.060160               | -0.817711 | 2.422447  |
| 11               | 1                | 0              | -1.962147               | -2.455732 | 1.769790  |
| 12               | 1                | 0              | -0.805522               | -1.930438 | 3.023554  |
| 13               | 6                | 0              | 3.133688                | -0.951654 | 0.564411  |
| 14               | 8                | 0              | 3.474111                | -1.805665 | 1.346599  |
| 15               | 8                | 0              | 3.995568                | -0.305485 | -0.232227 |
| 16               | 6                | 0              | -0.097348               | 2.587519  | -0.165881 |
| 17               | 8                | 0              | 0.792959                | 3.399086  | -0.095830 |
| 18               | 8                | 0              | -1.397759               | 2.924250  | -0.056089 |
| 19               | 1                | 0              | -1.943413               | 0.659539  | -0.358506 |
| 20               | 6                | 0              | -0.905041               | -0.900658 | -1.490290 |
| 21               | 1                | 0              | -1.220620               | -0.527503 | -2.474745 |
| 22               | 1                | 0              | 0.093982                | -1.317230 | -1.596234 |

|    |   |   |           |           |           |
|----|---|---|-----------|-----------|-----------|
| 23 | 6 | 0 | -1.847190 | -2.022706 | -1.127021 |
| 24 | 8 | 0 | -1.611434 | -3.190241 | -1.271901 |
| 25 | 8 | 0 | -3.020292 | -1.559950 | -0.662283 |
| 26 | 6 | 0 | 5.378351  | -0.662971 | -0.077937 |
| 27 | 1 | 0 | 5.676086  | -0.470063 | 0.955030  |
| 28 | 1 | 0 | 5.484561  | -1.733997 | -0.262129 |
| 29 | 6 | 0 | 6.168045  | 0.167927  | -1.063132 |
| 30 | 1 | 0 | 6.031641  | 1.232021  | -0.865232 |
| 31 | 1 | 0 | 7.230285  | -0.067649 | -0.977274 |
| 32 | 1 | 0 | 5.847920  | -0.039849 | -2.085092 |
| 33 | 6 | 0 | -4.014375 | -2.552651 | -0.362593 |
| 34 | 1 | 0 | -3.584770 | -3.291100 | 0.317843  |
| 35 | 1 | 0 | -4.278163 | -3.071588 | -1.286930 |
| 36 | 6 | 0 | -5.196758 | -1.835733 | 0.247482  |
| 37 | 1 | 0 | -4.904959 | -1.327755 | 1.168261  |
| 38 | 1 | 0 | -5.597676 | -1.094795 | -0.445652 |
| 39 | 1 | 0 | -5.984857 | -2.553342 | 0.481927  |
| 40 | 6 | 0 | -1.661074 | 4.314364  | 0.182382  |
| 41 | 1 | 0 | -1.285066 | 4.893333  | -0.664092 |
| 42 | 1 | 0 | -1.111198 | 4.629810  | 1.071488  |
| 43 | 6 | 0 | -3.155604 | 4.465666  | 0.353964  |
| 44 | 1 | 0 | -3.403151 | 5.512907  | 0.536677  |
| 45 | 1 | 0 | -3.682466 | 4.136524  | -0.542925 |
| 46 | 1 | 0 | -3.506799 | 3.874372  | 1.201101  |

---
